# Supplementary material for: The population genetics of collateral resistance and sensitivity
Source: eLife journal article supplement (doi:10.7554/elife.73250), 2021-12-10
Supplement: supp [file elife-73250-supp-v1.zip]

Archive with 9 entries (9 files):
- elife_poa_e73250_Figure_1_source_data_1.csv
- elife_poa_e73250_Figure_1_source_data_2.csv
- elife_poa_e73250_Figure_3_source_data_1.csv
- elife_poa_e73250_Transparent_Reporting_File.docx
- elife_poa_e73250_Figure_1_figure_supplement_1.pdf
- elife_poa_e73250_Figure_2_figure_supplement_1.pdf
- elife_poa_e73250_Figure_3_figure_supplement_1.pdf
- elife_poa_e73250_Figure_4_figure_supplement_1.pdf
- elife_poa_e73250_Figure_5_figure_supplement_1.pdf
