# Supplementary material for: The population genetics of collateral resistance and sensitivity
Source: eLife journal article supplement (doi:10.7554/elife.73250), 2021-12-10
Supplement: supp [file elife-73250-supp-v1.zip › elife_poa_e73250_Figure_1_source_data_2.csv]

	geneNames	call_AMP39	call_AMP156	call_AMP625	call_AMP2500	p_CRAmp_39	p_CRAmp_156	p_CRAmp_625	p_CRAmp_2500	p_CSAmp_39	p_CSAmp_156	p_CSAmp_625	p_CSAmp_2500
1	H26E	Collaterally Sensitive	Collaterally Neutral	Collaterally Neutral	Collaterally Sensitive	0.897738099680523	0.743120028548994	0.842824091963853	0.993755999628882	0.102261900319477	0.256879971451006	0.157175908036147	0.00624400037111762
2	H26P	Collaterally Sensitive	Collaterally Sensitive	Collaterally Sensitive	Collaterally Sensitive	0.89298501946447	0.999990518591453	0.911807590525706	1	0.10701498053553	9.48140854708634e-06	0.0881924094742935	6.70965152828396e-17
3	H26Q	Collaterally Sensitive	Collaterally Neutral	Collaterally Neutral	Collaterally Sensitive	0.999619330687475	0.304159923040187	0.75206450861458	0.970419075282855	0.000380669312524975	0.695840076959813	0.24793549138542	0.0295809247171449
4	H26R	Collaterally Neutral	Collaterally Resistant	Collaterally Neutral	Collaterally Neutral	0.623882148455455	0.116974575223297	0.56156865192113	0.621174333498034	0.376117851544545	0.883025424776703	0.43843134807887	0.378825666501966
5	H26S	Collaterally Sensitive	Collaterally Neutral	Collaterally Sensitive	Collaterally Neutral	0.999999999999687	0.663544912584759	0.999999840535434	0.211727263324013	3.12935437270712e-13	0.336455087415241	1.59464565578371e-07	0.788272736675987
6	P27A	Collaterally Neutral	Collaterally Neutral	Collaterally Sensitive	Collaterally Sensitive	0.484960632908364	0.532222422011789	0.985477865425873	0.999999978927635	0.515039367091636	0.467777577988211	0.0145221345741274	2.10723645133372e-08
7	P27C	Collaterally Resistant	Collaterally Neutral	Collaterally Neutral	Collaterally Sensitive	1.33267028540329e-05	0.652813231533709	0.427825361556288	0.93666836404012	0.999986673297146	0.347186768466291	0.572174638443712	0.0633316359598801
8	P27D	Collaterally Neutral	Collaterally Sensitive	Collaterally Sensitive	Collaterally Neutral	0.175628578679527	1	0.998687215861618	0.671817028950403	0.824371421320473	2.11573718570711e-49	0.00131278413838202	0.328182971049597
9	P27E	Collaterally Neutral	Collaterally Neutral	Collaterally Sensitive	Collaterally Resistant	0.301379598610276	0.504856155192695	0.997721754166039	0	0.698620401389724	0.495143844807305	0.00227824583396105	1
10	P27F	Collaterally Neutral	Collaterally Resistant	Collaterally Resistant	Collaterally Sensitive	0.742996359795732	1.05678799044995e-11	0.0058183312237825	0.98838095223355	0.257003640204268	0.999999999989432	0.994181668776217	0.0116190477664499
11	P27G	Collaterally Neutral	Collaterally Neutral	Collaterally Sensitive	Collaterally Sensitive	0.392432448671706	0.142550191330738	0.937164469071519	0.983844168137941	0.607567551328294	0.857449808669262	0.0628355309284809	0.016155831862059
12	P27H	Collaterally Neutral	Collaterally Resistant	Collaterally Neutral	Collaterally Neutral	0.20069518204251	0.0112008810709104	0.212982180368953	0.297523716372067	0.79930481795749	0.98879911892909	0.787017819631047	0.702476283627933
13	P27I	Collaterally Resistant	Collaterally Neutral	Collaterally Neutral	Collaterally Sensitive	0.00185707557171588	0.415426753009667	0.223240710456381	0.976730008101953	0.998142924428284	0.584573246990333	0.776759289543619	0.0232699918980475
14	P27K	Collaterally Resistant	Collaterally Neutral	Collaterally Neutral	Collaterally Resistant	0	0.421825194665722	0.26559741739367	5.78146449603523e-08	1	0.578174805334278	0.73440258260633	0.999999942185355
15	P27L	Collaterally Neutral	Collaterally Neutral	Collaterally Neutral	Collaterally Sensitive	0.210472292756231	0.278119134853201	0.437004582024497	0.953541732320678	0.789527707243769	0.721880865146799	0.562995417975503	0.0464582676793219
16	P27M	Collaterally Neutral	Collaterally Neutral	Collaterally Neutral	Collaterally Neutral	0.169395162762629	0.46605676799897	0.359184269437398	0.699368250506551	0.830604837237371	0.53394323200103	0.640815730562602	0.300631749493449
17	P27N	Collaterally Neutral	Collaterally Resistant	Collaterally Neutral	Collaterally Resistant	0.355280898390606	0.1020150132115	0.287750013127753	0.0111898812771047	0.644719101609394	0.8979849867885	0.712249986872247	0.988810118722895
18	P27Q	Collaterally Neutral	Collaterally Neutral	Collaterally Resistant	Collaterally Sensitive	0.196266690756175	0.148979607579909	0.0407664580629775	0.991953937528817	0.803733309243825	0.851020392420091	0.959233541937022	0.00804606247118336
19	P27R	Collaterally Neutral	Collaterally Neutral	Collaterally Neutral	Collaterally Neutral	0.439859758593169	0.764924699395735	0.731629267996198	0.250937616156373	0.560140241406831	0.235075300604265	0.268370732003802	0.749062383843627
20	P27S	Collaterally Neutral	Collaterally Neutral	Collaterally Neutral	Collaterally Sensitive	0.459522069159147	0.548404248862224	0.697675068217862	1	0.540477930840853	0.451595751137776	0.302324931782138	4.54848550093622e-35
21	P27T	Collaterally Neutral	Collaterally Sensitive	Collaterally Neutral	Collaterally Sensitive	0.689859129999019	0.987171245903294	0.477004089193774	0.940704408144915	0.310140870000981	0.0128287540967056	0.522995910806226	0.0592955918550853
22	P27V	Collaterally Resistant	Collaterally Resistant	Collaterally Sensitive	Collaterally Resistant	0.0545699947230127	0.0200363931112296	1	0	0.945430005276987	0.97996360688877	1.14192441046818e-78	1
23	P27W	Collaterally Resistant	Collaterally Neutral	Collaterally Resistant	Collaterally Sensitive	0.00137987105340087	0.145876422986419	0.0911308004435295	0.908271291583943	0.998620128946599	0.854123577013581	0.90886919955647	0.0917287084160569
24	E28A	Collaterally Neutral	Collaterally Resistant	Collaterally Neutral	Collaterally Neutral	0.299122363763076	0.0152518909268932	0.149598797449105	0.365187374027507	0.700877636236924	0.984748109073107	0.850401202550895	0.634812625972493
25	E28D	Collaterally Neutral	Collaterally Neutral	Collaterally Neutral	Collaterally Sensitive	0.664975884392411	0.137233450074352	0.2979900222424	1	0.335024115607589	0.862766549925648	0.7020099777576	9.78089889677488e-122
26	E28H	Collaterally Resistant	Collaterally Resistant	Collaterally Resistant	Collaterally Resistant	0.0395230466778125	0	0	0.00177416142960463	0.960476953322188	1	1	0.998225838570395
27	E28K	Collaterally Neutral	Collaterally Neutral	Collaterally Neutral	Collaterally Neutral	0.367041513232289	0.249891854043396	0.182957545470387	0.206231937128701	0.632958486767711	0.750108145956604	0.817042454529613	0.793768062871299
28	E28R	Collaterally Neutral	Collaterally Neutral	Collaterally Neutral	Collaterally Sensitive	0.235959144587452	0.144119007208762	0.170881952812841	1	0.764040855412548	0.855880992791238	0.829118047187159	3.21907635629854e-33
29	E28V	Collaterally Resistant	Collaterally Resistant	Collaterally Resistant	Collaterally Sensitive	0.0939852936709231	0	9.54265055153058e-06	0.999971673075575	0.906014706329077	1	0.999990457349448	2.83269244254106e-05
30	E28Y	Collaterally Resistant	Collaterally Resistant	Collaterally Neutral	Collaterally Sensitive	0.0702341641644817	0.000339172258699949	0.122570490644571	0.936473294459895	0.929765835835518	0.9996608277413	0.877429509355429	0.0635267055401048
31	T29A	Collaterally Neutral	Collaterally Resistant	Collaterally Neutral	Collaterally Sensitive	0.203469994417261	5.52423662369961e-10	0.354447087201242	1	0.796530005582739	0.999999999447576	0.645552912798758	3.62662602455567e-16
32	T29D	Collaterally Sensitive	Collaterally Sensitive	Collaterally Sensitive	Collaterally Sensitive	0.911203230654681	0.981553126084892	0.967274417135958	0.999999442385321	0.0887967693453194	0.0184468739151077	0.0327255828640417	5.57614679475641e-07
33	T29I	Collaterally Neutral	Collaterally Resistant	Collaterally Neutral	Collaterally Sensitive	0.271901962608279	0.107277287563314	0.359911378603498	0.998546931479668	0.728098037391721	0.892722712436686	0.640088621396502	0.0014530685203323
34	T29K	Collaterally Resistant	Collaterally Resistant	Collaterally Sensitive	Collaterally Sensitive	0.0011089045927748	0.0799083020522562	0.938137619471501	0.998562310826897	0.998891095407225	0.920091697947744	0.0618623805284986	0.00143768917310336
35	T29L	Collaterally Resistant	Collaterally Neutral	Collaterally Neutral	Collaterally Sensitive	0.00100627731806524	0.326143010018618	0.553773215543777	0.987228211396823	0.998993722681935	0.673856989981382	0.446226784456223	0.0127717886031773
36	T29P	Collaterally Resistant	Collaterally Resistant	Collaterally Sensitive	Collaterally Sensitive	8.92250723849575e-06	0.064237938777765	0.999834184554421	0.999999999998254	0.999991077492762	0.935762061222235	0.000165815445579007	1.74562935258087e-12
37	T29Q	Collaterally Resistant	Collaterally Neutral	Collaterally Neutral	Collaterally Sensitive	0.0579381281020844	0.194966782369426	0.632569969480106	1	0.942061871897916	0.805033217630574	0.367430030519894	1.47127442833533e-29
38	T29R	Collaterally Neutral	Collaterally Resistant	Collaterally Sensitive	Collaterally Sensitive	0.331175477065143	0	0.992601565392927	0.999999998739809	0.668824522934857	1	0.00739843460707304	1.26019126756513e-09
39	T29V	Collaterally Resistant	Collaterally Neutral	Collaterally Neutral	Collaterally Neutral	0	0.269935664614281	0.233782019184525	0.238914540487991	1	0.730064335385719	0.766217980815475	0.761085459512009
40	L30A	Collaterally Neutral	Collaterally Neutral	Collaterally Resistant	Collaterally Sensitive	0.228401488084247	0.559092758051146	0.0640875439529055	0.999999756115042	0.771598511915753	0.440907241948854	0.935912456047094	2.43884957528436e-07
41	L30C	Collaterally Neutral	Collaterally Neutral	Collaterally Resistant	Collaterally Sensitive	0.839165474454841	0.754906790362058	0.0212123449997959	0.98991248880413	0.160834525545159	0.245093209637942	0.978787655000204	0.0100875111958702
42	L30D	Collaterally Neutral	Collaterally Neutral	Collaterally Sensitive	Collaterally Sensitive	0.263819055216482	0.387056727648552	0.99973393521325	1	0.736180944783518	0.612943272351448	0.000266064786750084	1.42556868759114e-36
43	L30E	Collaterally Sensitive	Collaterally Neutral	Collaterally Resistant	Collaterally Sensitive	0.960130908757864	0.468040929934784	2.86587420683659e-07	0.999999999999045	0.0398690912421361	0.531959070065216	0.999999713412579	9.5524635515292e-13
44	L30G	Collaterally Sensitive	Collaterally Neutral	Collaterally Neutral	Collaterally Sensitive	0.996745625606723	0.472734719724228	0.152940500033114	1	0.00325437439327673	0.527265280275772	0.847059499966886	2.61026617732708e-36
45	L30K	Collaterally Neutral	Collaterally Resistant	Collaterally Resistant	Collaterally Resistant	0.52656161239507	0.000191753083752744	0	0.01788397913199	0.47343838760493	0.999808246916247	1	0.98211602086801
46	L30M	Collaterally Neutral	Collaterally Neutral	Collaterally Neutral	Collaterally Sensitive	0.803773111735577	0.438638428840221	0.565288466247194	0.988889182126726	0.196226888264423	0.561361571159779	0.434711533752806	0.0111108178732743
47	L30N	Collaterally Resistant	Collaterally Neutral	Collaterally Resistant	Collaterally Sensitive	1.48965690776048e-05	0.159284312078893	2.14680051513483e-10	0.999598190112601	0.999985103430922	0.840715687921107	0.99999999978532	0.00040180988739887
48	L30P	Collaterally Neutral	Collaterally Neutral	Collaterally Sensitive	Collaterally Sensitive	0.470153125666131	0.577754019314087	0.937052104222596	1	0.529846874333869	0.422245980685913	0.0629478957774037	9.56681249186791e-24
49	L30Q	Collaterally Neutral	Collaterally Neutral	Collaterally Resistant	Collaterally Sensitive	0.445007103319112	0.638394258054827	0	0.995735734447577	0.554992896680888	0.361605741945173	1	0.00426426555242316
50	L30S	Collaterally Neutral	Collaterally Neutral	Collaterally Neutral	Collaterally Sensitive	0.648109415473258	0.701135901266427	0.550070802127142	0.999998649431575	0.351890584526742	0.298864098733573	0.449929197872858	1.35056842519883e-06
51	L30V	Collaterally Neutral	Collaterally Neutral	Collaterally Neutral	Collaterally Resistant	0.433792159063618	0.603110503350406	0.138416450307083	0.0372212678186153	0.566207840936382	0.396889496649594	0.861583549692917	0.962778732181385
52	L30Y	Collaterally Resistant	Collaterally Neutral	Collaterally Resistant	Collaterally Sensitive	0	0.229512931381651	0.0912077015472514	0.98010662846378	1	0.770487068618349	0.908792298452749	0.0198933715362196
53	V31A	Collaterally Neutral	Collaterally Resistant	Collaterally Neutral	Collaterally Resistant	0.617353398187539	0	0.23493919802093	0.0523510162952929	0.382646601812461	1	0.76506080197907	0.947648983704707
54	V31C	Collaterally Resistant	Collaterally Neutral	Collaterally Resistant	Collaterally Neutral	0.0402522016730562	0.129557513871554	2.11524946025499e-06	0.247326153590365	0.959747798326944	0.870442486128446	0.99999788475054	0.752673846409635
55	V31G	Collaterally Resistant	Collaterally Resistant	Collaterally Neutral	Collaterally Resistant	0.00749395710870115	5.32928745577976e-09	0.269220764823343	0.0196434810920149	0.992506042891299	0.999999994670713	0.730779235176657	0.980356518907985
56	V31R	Collaterally Neutral	Collaterally Resistant	Collaterally Neutral	Collaterally Resistant	0.640137744284667	0.0874619956803212	0.293971903963964	0	0.359862255715333	0.912538004319679	0.706028096036036	1
57	V31W	Collaterally Neutral	Collaterally Resistant	Collaterally Neutral	Collaterally Resistant	0.422346895294916	0.0558218402869004	0.370230105847259	0.00910711612276438	0.577653104705084	0.9441781597131	0.629769894152741	0.990892883877236
58	V33C	Collaterally Sensitive	Collaterally Neutral	Collaterally Sensitive	Collaterally Sensitive	0.999999113933667	0.76412903015102	1	0.992167199925244	8.86066333169935e-07	0.235870969848981	1.74618903246655e-84	0.00783280007475591
59	V33D	Collaterally Sensitive	Collaterally Sensitive	Collaterally Sensitive	Collaterally Sensitive	0.999192750710626	0.999999999999993	1	1	0.000807249289373753	7.45829118098917e-15	0	0
60	V33G	Collaterally Neutral	Collaterally Sensitive	Collaterally Sensitive	Collaterally Sensitive	0.707361626380623	0.980186507089013	1	1	0.292638373619377	0.0198134929109867	8.28222360172895e-83	0
61	V33Q	Collaterally Sensitive	Collaterally Sensitive	Collaterally Sensitive	Collaterally Sensitive	0.998632195192987	1	0.999999994980933	0.999999999999172	0.00136780480701257	4.198968770316e-28	5.01906716534003e-09	8.28421061403504e-13
62	K34D	Collaterally Neutral	Collaterally Neutral	Collaterally Sensitive	Collaterally Sensitive	0.59264183010473	0.563011063873661	1	0.999712271872859	0.40735816989527	0.436988936126339	5.86027754692086e-24	0.000287728127140723
63	K34E	Collaterally Neutral	Collaterally Neutral	Collaterally Neutral	Collaterally Neutral	0.453639747956403	0.575369566551051	0.216872407196587	0.876797524348502	0.546360252043597	0.424630433448949	0.783127592803413	0.123202475651498
64	K34F	Collaterally Neutral	Collaterally Neutral	Collaterally Resistant	Collaterally Sensitive	0.199062660786312	0.452768984221584	0.00742568224779971	0.999373856677768	0.800937339213688	0.547231015778416	0.9925743177522	0.00062614332223187
65	K34G	Collaterally Neutral	Collaterally Neutral	Collaterally Neutral	Collaterally Sensitive	0.500767493709135	0.637566595884108	0.445340748898779	0.999777722843653	0.499232506290865	0.362433404115892	0.554659251101221	0.000222277156346555
66	K34H	Collaterally Neutral	Collaterally Neutral	Collaterally Neutral	Collaterally Neutral	0.474634392942278	0.673466468633205	0.455676023537858	0.448787562384125	0.525365607057722	0.326533531366795	0.544323976462142	0.551212437615875
67	K34I	Collaterally Neutral	Collaterally Neutral	Collaterally Neutral	Collaterally Sensitive	0.523472335296341	0.394727410026204	0.546745468093022	0.999992059681533	0.476527664703659	0.605272589973796	0.453254531906978	7.94031846729637e-06
68	K34L	Collaterally Neutral	Collaterally Neutral	Collaterally Neutral	Collaterally Sensitive	0.537173116334101	0.593156166579119	0.536858044158174	0.999952592505712	0.462826883665899	0.406843833420881	0.463141955841826	4.74074942876092e-05
69	K34M	Collaterally Resistant	Collaterally Neutral	Collaterally Resistant	Collaterally Neutral	0.115675422238739	0.441632805615872	0.120630822182455	0.545191738488498	0.884324577761261	0.558367194384128	0.879369177817545	0.454808261511502
70	K34P	Collaterally Neutral	Collaterally Sensitive	Collaterally Sensitive	Collaterally Sensitive	0.82549961008325	1	1	0.999998620210448	0.17450038991675	1.69469115414567e-78	8.27173188486521e-113	1.37978955164123e-06
71	K34Q	Collaterally Neutral	Collaterally Resistant	Collaterally Neutral	Collaterally Resistant	0.154440553945524	0	0.482588144403961	0.00228066617839229	0.845559446054476	1	0.517411855596039	0.997719333821608
72	K34T	Collaterally Neutral	Collaterally Neutral	Collaterally Resistant	Collaterally Sensitive	0.233786201787503	0.294379485775007	0.0279672575066396	0.999723331015276	0.766213798212497	0.705620514224993	0.97203274249336	0.000276668984724253
73	K34W	Collaterally Neutral	Collaterally Neutral	Collaterally Neutral	Collaterally Sensitive	0.502866440168921	0.307485804598084	0.414459616338309	0.97673661359509	0.497133559831079	0.692514195401916	0.585540383661691	0.0232633864049105
74	K34Y	Collaterally Neutral	Collaterally Neutral	Collaterally Resistant	Collaterally Sensitive	0.447578995161538	0.308884012853866	1.49880108324396e-14	0.982066609941371	0.552421004838462	0.691115987146134	0.999999999999985	0.0179333900586293
75	D35A	Collaterally Neutral	Collaterally Neutral	Collaterally Sensitive	Collaterally Sensitive	0.675644737188659	0.601882765282408	0.998097804571023	0.905275763749132	0.324355262811341	0.398117234717592	0.00190219542897671	0.0947242362508685
76	D35C	Collaterally Sensitive	Collaterally Neutral	Collaterally Sensitive	Collaterally Sensitive	0.976089638296425	0.860699116891128	0.993053557667254	0.994793470381422	0.0239103617035748	0.139300883108872	0.00694644233274603	0.00520652961857813
77	D35E	Collaterally Sensitive	Collaterally Neutral	Collaterally Sensitive	Collaterally Sensitive	0.999462692161401	0.581760041433229	0.928950989063373	0.959758409508783	0.000537307838598771	0.418239958566771	0.0710490109366267	0.0402415904912168
78	D35H	Collaterally Neutral	Collaterally Neutral	Collaterally Sensitive	Collaterally Sensitive	0.67243910533479	0.530610754832558	0.999987539273897	0.888256678603247	0.32756089466521	0.469389245167442	1.2460726102511e-05	0.111743321396753
79	D35K	Collaterally Neutral	Collaterally Neutral	Collaterally Sensitive	Collaterally Sensitive	0.692762599908374	0.639489828934374	0.942234994433886	0.999999987150395	0.307237400091626	0.360510171065626	0.0577650055661144	1.28496046131236e-08
80	D35Q	Collaterally Neutral	Collaterally Resistant	Collaterally Neutral	Collaterally Resistant	0.391551405695733	1.01665578622345e-07	0.623570044025842	0.0171183704702501	0.608448594304267	0.999999898334421	0.376429955974158	0.98288162952975
81	D35R	Collaterally Sensitive	Collaterally Neutral	Collaterally Sensitive	Collaterally Neutral	0.999999999999998	0.679666223721541	0.962360914150979	0.782460749626541	1.9258762025521e-15	0.320333776278459	0.0376390858490213	0.217539250373459
82	A36E	Collaterally Neutral	Collaterally Sensitive	Collaterally Sensitive	Collaterally Sensitive	0.346158023336671	0.896951355325705	1	1	0.653841976663329	0.103048644674295	6.60894746600116e-53	1.33037821650946e-24
83	A36G	Collaterally Sensitive	Collaterally Neutral	Collaterally Neutral	Collaterally Sensitive	0.968673152889787	0.808646957585666	0.442318925691094	0.998804052881392	0.0313268471102134	0.191353042414334	0.557681074308906	0.001195947118608
84	A36K	Collaterally Neutral	Collaterally Sensitive	Collaterally Sensitive	Collaterally Sensitive	0.692102804465074	1	0.99991385636016	1	0.307897195534926	3.06393667021016e-139	8.6143639840369e-05	2.7417541475323e-86
85	A36L	Collaterally Sensitive	Collaterally Neutral	Collaterally Neutral	Collaterally Sensitive	0.987431598178463	0.457641263057749	0.636625676309187	0.993601226647561	0.0125684018215374	0.542358736942251	0.363374323690813	0.00639877335243909
86	A36M	Collaterally Sensitive	Collaterally Neutral	Collaterally Neutral	Collaterally Neutral	0.993052099566743	0.130456466152098	0.269071128626048	0.479838149798748	0.00694790043325697	0.869543533847902	0.730928871373952	0.520161850201252
87	A36P	Collaterally Neutral	Collaterally Sensitive	Collaterally Sensitive	Collaterally Sensitive	0.581640491311716	0.979646741079117	1	1	0.418359508688284	0.0203532589208825	1.43177456118044e-83	0
88	A36Q	Collaterally Neutral	Collaterally Neutral	Collaterally Neutral	Collaterally Sensitive	0.224318550612339	0.273257505642951	0.131495408828472	0.99999863898678	0.775681449387661	0.726742494357049	0.868504591171528	1.36101321959247e-06
89	A36R	Collaterally Neutral	Collaterally Sensitive	Collaterally Sensitive	Collaterally Sensitive	0.742684526726627	0.999298619371584	1	0.999999742477739	0.257315473273373	0.000701380628416234	0	2.57522260578026e-07
90	A36T	Collaterally Sensitive	Collaterally Neutral	Collaterally Resistant	Collaterally Sensitive	0.976945169028998	0.682572434887426	0	0.999495686657657	0.0230548309710023	0.317427565112574	1	0.000504313342342658
91	A36V	Collaterally Sensitive	Collaterally Neutral	Collaterally Neutral	Collaterally Neutral	0.886282410261696	0.252364309820005	0.51459009615068	0.859345763684166	0.113717589738304	0.747635690179995	0.48540990384932	0.140654236315834
92	A36W	Collaterally Sensitive	Collaterally Neutral	Collaterally Neutral	Collaterally Sensitive	1	0.813043021267238	0.588075819896575	0.999919867765465	4.4367545890227e-55	0.186956978732762	0.411924180103425	8.01322345346556e-05
93	E37A	Collaterally Neutral	Collaterally Resistant	Collaterally Resistant	Collaterally Sensitive	0.664882129374491	0.0876919894746816	9.55346240809618e-05	0.999999486815483	0.335117870625509	0.912308010525318	0.999904465375919	5.13184517268278e-07
94	E37C	Collaterally Neutral	Collaterally Neutral	Collaterally Sensitive	Collaterally Sensitive	0.52528211649187	0.591075634652417	0.96444218535141	1	0.47471788350813	0.408924365347583	0.0355578146485902	1.6955524090232e-120
95	E37D	Collaterally Neutral	Collaterally Resistant	Collaterally Sensitive	Collaterally Sensitive	0.703452989935849	0.0558114903780909	0.927401871121958	1	0.296547010064151	0.944188509621909	0.0725981288780422	1.74683289943713e-36
96	E37H	Collaterally Neutral	Collaterally Sensitive	Collaterally Sensitive	Collaterally Sensitive	0.497476312062333	0.986279128461425	1	1	0.502523687937667	0.0137208715385754	8.64884414956286e-241	5.62992493668839e-19
97	E37I	Collaterally Neutral	Collaterally Resistant	Collaterally Sensitive	Collaterally Sensitive	0.53530573997357	0.00399523906911792	0.991776947923693	1	0.46469426002643	0.996004760930882	0.0082230520763074	6.36734811139709e-295
98	E37M	Collaterally Neutral	Collaterally Resistant	Collaterally Sensitive	Collaterally Sensitive	0.579904072627572	1.41155864774589e-10	0.901311722274998	1	0.420095927372428	0.999999999858844	0.0986882777250025	0
99	E37P	Collaterally Sensitive	Collaterally Sensitive	Collaterally Sensitive	Collaterally Sensitive	0.989434998650275	1	1	0.99999999999595	0.0105650013497247	1.47464285134025e-159	3.47146211481756e-207	4.04979310571499e-12
100	E37Q	Collaterally Neutral	Collaterally Sensitive	Collaterally Neutral	Collaterally Sensitive	0.676579150221013	0.898993604124592	0.432388470927981	0.998368132092377	0.323420849778986	0.101006395875408	0.567611529072019	0.00163186790762317
101	E37R	Collaterally Sensitive	Collaterally Neutral	Collaterally Sensitive	Collaterally Sensitive	0.98373929281772	0.473347926125026	0.999639001350309	1	0.01626070718228	0.526652073874974	0.000360998649690586	1.30057790274836e-36
102	E37S	Collaterally Neutral	Collaterally Neutral	Collaterally Sensitive	Collaterally Sensitive	0.494758656511321	0.227178488023051	0.966406711115317	0.999999993944107	0.505241343488679	0.772821511976949	0.033593288884683	6.05589303199577e-09
103	E37T	Collaterally Neutral	Collaterally Sensitive	Collaterally Sensitive	Collaterally Sensitive	0.732015743734071	1	0.999992642376247	0.999488766731491	0.267984256265929	2.16263542455452e-28	7.3576237531655e-06	0.000511233268509237
104	E37V	Collaterally Neutral	Collaterally Neutral	Collaterally Sensitive	Collaterally Sensitive	0.682882226629985	0.370114295894831	0.932505591507098	0.999999999972081	0.317117773370015	0.629885704105169	0.0674944084929024	2.79193262096892e-11
105	D38C	Collaterally Sensitive	Collaterally Neutral	Collaterally Neutral	Collaterally Sensitive	0.915226832820667	0.428414335388493	0.133357790967288	0.977443603228104	0.084773167179333	0.571585664611507	0.866642209032712	0.0225563967718965
106	D38G	Collaterally Neutral	Collaterally Neutral	Collaterally Neutral	Collaterally Resistant	0.731311726117625	0.472769675952293	0.362147600770701	0.103134296906934	0.268688273882375	0.527230324047707	0.637852399229299	0.896865703093066
107	D38H	Collaterally Sensitive	Collaterally Neutral	Collaterally Neutral	Collaterally Neutral	1	0.615369892871166	0.394229471617282	0.801145352229546	4.24818661076088e-62	0.384630107128834	0.605770528382718	0.198854647770454
108	D38K	Collaterally Neutral	Collaterally Neutral	Collaterally Neutral	Collaterally Neutral	0.673253841254227	0.289066840498708	0.311758757124534	0.519329213089379	0.326746158745773	0.710933159501292	0.688241242875466	0.480670786910621
109	D38L	Collaterally Neutral	Collaterally Neutral	Collaterally Neutral	Collaterally Neutral	0.762947116211032	0.532650897432395	0.566487758855593	0.694261845504016	0.237052883788968	0.467349102567605	0.433512241144407	0.305738154495984
110	D38M	Collaterally Neutral	Collaterally Neutral	Collaterally Resistant	Collaterally Resistant	0.836760621912404	0.282478235851393	0	0.100432300115899	0.163239378087596	0.717521764148607	1	0.899567699884101
111	D38R	Collaterally Neutral	Collaterally Neutral	Collaterally Neutral	Collaterally Resistant	0.837771698632232	0.298290771406697	0.223667101093259	4.63126776384382e-06	0.162228301367768	0.701709228593303	0.776332898906741	0.999995368732236
112	D38V	Collaterally Neutral	Collaterally Neutral	Collaterally Resistant	Collaterally Neutral	0.840304785799683	0.251869465401275	0	0.496874161622698	0.159695214200317	0.748130534598725	1	0.503125838377302
113	D38W	Collaterally Sensitive	Collaterally Neutral	Collaterally Neutral	Collaterally Resistant	0.995880396094592	0.392073210408435	0.2133985738269	0	0.00411960390540828	0.607926789591565	0.7866014261731	1
114	Q39C	Collaterally Neutral	Collaterally Neutral	Collaterally Neutral	Collaterally Sensitive	0.62984257631227	0.261932566313391	0.512840006248075	0.878071813217174	0.37015742368773	0.738067433686609	0.487159993751925	0.121928186782826
115	Q39D	Collaterally Sensitive	Collaterally Neutral	Collaterally Neutral	Collaterally Sensitive	0.99999992055097	0.372617360422977	0.507709594269753	0.974016866088708	7.94490299389898e-08	0.627382639577023	0.492290405730247	0.0259831339112923
116	Q39E	Collaterally Sensitive	Collaterally Neutral	Collaterally Neutral	Collaterally Neutral	0.954379931426863	0.447303553906333	0.33719139701583	0.362800585679002	0.0456200685731371	0.552696446093667	0.66280860298417	0.637199414320998
117	Q39F	Collaterally Neutral	Collaterally Neutral	Collaterally Neutral	Collaterally Neutral	0.246339576653633	0.609445914243667	0.430884876320328	0.602815064980897	0.753660423346367	0.390554085756333	0.569115123679672	0.397184935019103
118	Q39G	Collaterally Neutral	Collaterally Neutral	Collaterally Neutral	Collaterally Sensitive	0.655135492516253	0.533912105096932	0.595801080384482	0.97919824186402	0.344864507483747	0.466087894903068	0.404198919615518	0.0208017581359797
119	Q39I	Collaterally Neutral	Collaterally Neutral	Collaterally Neutral	Collaterally Neutral	0.575970063575489	0.315127723864826	0.415621412958765	0.314856992434672	0.424029936424511	0.684872276135174	0.584378587041235	0.685143007565328
120	Q39K	Collaterally Sensitive	Collaterally Neutral	Collaterally Neutral	Collaterally Neutral	1	0.385785902274268	0.39196785548916	0.4193248647978	1.58603486568118e-247	0.614214097725732	0.60803214451084	0.5806751352022
121	Q39M	Collaterally Sensitive	Collaterally Neutral	Collaterally Neutral	Collaterally Resistant	0.99999999975174	0.398573784641357	0.364499307049732	0.0917004540660041	2.48259563785204e-10	0.601426215358643	0.635500692950268	0.908299545933996
122	Q39N	Collaterally Neutral	Collaterally Neutral	Collaterally Neutral	Collaterally Neutral	0.745405467740878	0.452236405275878	0.48917593606599	0.379937956337553	0.254594532259122	0.547763594724122	0.51082406393401	0.620062043662447
123	Q39R	Collaterally Sensitive	Collaterally Neutral	Collaterally Neutral	Collaterally Resistant	0.99483625677386	0.462483782521556	0.360540603941483	2.03224685968451e-08	0.00516374322614042	0.537516217478444	0.639459396058517	0.999999979677531
124	L40A	Collaterally Neutral	Collaterally Neutral	Collaterally Neutral	Collaterally Sensitive	0.672314702631488	0.849998343244269	0.79909112471636	0.99979533197257	0.327685297368512	0.150001656755731	0.20090887528364	0.000204668027430428
125	L40C	Collaterally Resistant	Collaterally Neutral	Collaterally Sensitive	Collaterally Sensitive	0.00246195456243092	0.168186336383127	1	0.999999999999999	0.997538045437569	0.831813663616873	3.92804863842198e-237	8.90674785148727e-16
126	L40D	Collaterally Neutral	Collaterally Neutral	Collaterally Resistant	Collaterally Sensitive	0.379431657549877	0.355483180693172	0	1	0.620568342450123	0.644516819306828	1	4.61119912080991e-16
127	L40E	Collaterally Resistant	Collaterally Neutral	Collaterally Resistant	Collaterally Sensitive	2.41362485553509e-13	0.414585804097397	3.82392479791882e-06	0.999999998487967	0.999999999999759	0.585414195902603	0.999996176075202	1.51203352726947e-09
128	L40F	Collaterally Sensitive	Collaterally Neutral	Collaterally Neutral	Collaterally Sensitive	0.937044109939543	0.235382864028971	0.8175929266783	0.977562288249563	0.0629558900604572	0.764617135971029	0.1824070733217	0.0224377117504372
129	L40G	Collaterally Neutral	Collaterally Neutral	Collaterally Sensitive	Collaterally Sensitive	0.286224995401308	0.736826408073864	0.917994374120659	0.993164565996765	0.713775004598692	0.263173591926136	0.0820056258793408	0.00683543400323518
130	L40H	Collaterally Resistant	Collaterally Neutral	Collaterally Neutral	Collaterally Sensitive	0.000887818254724948	0.586131556766231	0.785879078075144	0.999984904894482	0.999112181745275	0.413868443233769	0.214120921924856	1.50951055180321e-05
131	L40K	Collaterally Resistant	Collaterally Neutral	Collaterally Neutral	Collaterally Sensitive	0.0330516885493094	0.404054575107346	0.86079936498606	0.99995608813447	0.966948311450691	0.595945424892654	0.13920063501394	4.39118655296441e-05
132	L40M	Collaterally Neutral	Collaterally Sensitive	Collaterally Neutral	Collaterally Neutral	0.670009481145685	1	0.768876466420396	0.363544106514084	0.329990518854315	7.61052236786783e-145	0.231123533579604	0.636455893485916
133	L40N	Collaterally Resistant	Collaterally Sensitive	Collaterally Resistant	Collaterally Sensitive	0.0530757678158255	0.886371048511356	0.00603245142945841	0.999995128026019	0.946924232184175	0.113628951488644	0.993967548570542	4.87197398073903e-06
134	L40P	Collaterally Sensitive	Collaterally Sensitive	Collaterally Sensitive	Collaterally Sensitive	0.945235185665637	0.988435583540149	0.999999998373184	1	0.0547648143343633	0.0115644164598512	1.62681551709762e-09	4.39231326138257e-29
135	L40Q	Collaterally Neutral	Collaterally Neutral	Collaterally Neutral	Collaterally Sensitive	0.453702634493474	0.783749233572905	0.234476500055435	1	0.546297365506526	0.216250766427094	0.765523499944565	2.75760257965357e-25
136	L40R	Collaterally Neutral	Collaterally Neutral	Collaterally Sensitive	Collaterally Sensitive	0.47794264157121	0.669332204525789	0.999880743486348	1	0.52205735842879	0.330667795474211	0.000119256513652322	9.94381809449142e-29
137	L40S	Collaterally Neutral	Collaterally Sensitive	Collaterally Sensitive	Collaterally Sensitive	0.44767174498954	0.99997982373798	1	0.996963510712452	0.55232825501046	2.01762620202467e-05	2.5087931424237e-17	0.00303648928754832
138	L40T	Collaterally Neutral	Collaterally Neutral	Collaterally Sensitive	Collaterally Sensitive	0.205071843215409	0.693477163634647	0.973140058202893	1	0.794928156784591	0.306522836365353	0.026859941797107	5.95823638101896e-29
139	L40V	Collaterally Neutral	Collaterally Sensitive	Collaterally Neutral	Collaterally Sensitive	0.821753646040056	0.999938770048498	0.836064267823578	0.999643911547822	0.178246353959944	6.12299515017643e-05	0.163935732176422	0.000356088452178063
140	L40W	Collaterally Neutral	Collaterally Neutral	Collaterally Neutral	Collaterally Sensitive	0.357971035120808	0.350095803270969	0.835542644904359	0.996639759720441	0.642028964879192	0.649904196729031	0.16445735509564	0.00336024027955882
141	L40Y	Collaterally Neutral	Collaterally Neutral	Collaterally Neutral	Collaterally Sensitive	0.407113256424227	0.224475039765969	0.42112813583603	0.989526049591649	0.592886743575773	0.775524960234031	0.57887186416397	0.0104739504083506
142	G41A	Collaterally Neutral	Collaterally Neutral	Collaterally Sensitive	Collaterally Sensitive	0.632823376587736	0.3177250403725	1	0.940160193456646	0.367176623412264	0.6822749596275	3.51863742431802e-20	0.0598398065433539
143	G41C	Collaterally Sensitive	Collaterally Neutral	Collaterally Neutral	Collaterally Sensitive	0.900903254819318	0.751513672050366	0.855835749261062	0.958006538392111	0.0990967451806819	0.248486327949634	0.144164250738938	0.0419934616078891
144	G41F	Collaterally Neutral	Collaterally Neutral	Collaterally Neutral	Collaterally Sensitive	0.759395386419321	0.867005690962312	0.173307991501233	0.988747902285574	0.240604613580679	0.132994309037688	0.826692008498767	0.0112520977144263
145	G41R	Collaterally Neutral	Collaterally Neutral	Collaterally Neutral	Collaterally Sensitive	0.82912915841084	0.41423328654645	0.5301467658538	0.997681800922078	0.17087084158916	0.58576671345355	0.4698532341462	0.00231819907792235
146	G41S	Collaterally Neutral	Collaterally Resistant	Collaterally Neutral	Collaterally Neutral	0.822352860247515	0.0967396785070038	0.396664182252716	0.873490372208999	0.177647139752485	0.903260321492996	0.603335817747284	0.126509627791001
147	G41V	Collaterally Sensitive	Collaterally Neutral	Collaterally Resistant	Collaterally Sensitive	0.970460348175326	0.563885185787716	0.036472874652987	0.999999999968998	0.0295396518246743	0.436114814212284	0.963527125347013	3.10016716331982e-11
148	G41W	Collaterally Sensitive	Collaterally Neutral	Collaterally Neutral	Collaterally Sensitive	0.92323809898887	0.206250426578389	0.35494040541976	0.999861426713182	0.0767619010111297	0.793749573421611	0.64505959458024	0.000138573286818056
149	A42C	Collaterally Sensitive	Collaterally Sensitive	Collaterally Sensitive	Collaterally Sensitive	0.919914080211226	0.87882294457441	0.999999979395941	1	0.0800859197887743	0.12117705542559	2.06040588791611e-08	2.28709353735765e-46
150	A42D	Collaterally Neutral	Collaterally Sensitive	Collaterally Sensitive	Collaterally Sensitive	0.438967465723606	0.999999999999536	0.961422000312411	0.999999999999977	0.561032534276394	4.6386264164751e-13	0.0385779996875892	2.29592495609829e-14
151	A42G	Collaterally Neutral	Collaterally Sensitive	Collaterally Neutral	Collaterally Resistant	0.431524782928813	0.985316968365089	0.292021039684552	0.0660410001050608	0.568475217071187	0.0146830316349108	0.707978960315448	0.933958999894939
152	A42H	Collaterally Neutral	Collaterally Neutral	Collaterally Sensitive	Collaterally Sensitive	0.186245211636986	0.848656300825175	0.949311765029668	0.999999522055372	0.813754788363014	0.151343699174825	0.0506882349703324	4.77944627582102e-07
153	A42K	Collaterally Neutral	Collaterally Neutral	Collaterally Sensitive	Collaterally Sensitive	0.440704182130619	0.860937350060471	0.987981296012759	1	0.559295817869381	0.139062649939529	0.0120187039872407	2.95392429110391e-78
154	A42M	Collaterally Neutral	Collaterally Neutral	Collaterally Sensitive	Collaterally Sensitive	0.58341623849785	0.843940188386942	0.91587079553216	0.994303790915758	0.41658376150215	0.156059811613058	0.08412920446784	0.00569620908424221
155	A42N	Collaterally Neutral	Collaterally Neutral	Collaterally Neutral	Collaterally Sensitive	0.708961651489525	0.854230929282697	0.772862783918256	1	0.291038348510475	0.145769070717303	0.227137216081744	0
156	A42Q	Collaterally Neutral	Collaterally Sensitive	Collaterally Neutral	Collaterally Sensitive	0.766352138368039	0.994295390851985	0.814097726333943	0.988335943778776	0.233647861631961	0.00570460914801495	0.185902273666057	0.0116640562212241
157	A42R	Collaterally Sensitive	Collaterally Sensitive	Collaterally Sensitive	Collaterally Sensitive	0.991072520009856	0.999754277634611	0.999824830299033	1	0.00892747999014435	0.000245722365388525	0.000175169700967261	1.84215032018281e-156
158	A42S	Collaterally Neutral	Collaterally Sensitive	Collaterally Neutral	Collaterally Sensitive	0.783232505117747	0.999991897811387	0.617558634963966	0.982568496344598	0.216767494882253	8.1021886130224e-06	0.382441365036034	0.0174315036554021
159	A42T	Collaterally Sensitive	Collaterally Sensitive	Collaterally Resistant	Collaterally Sensitive	0.9886894156073	0.993640803574387	0.000504242999508242	0.999498417350042	0.0113105843926999	0.00635919642561297	0.999495757000492	0.000501582649958305
160	A42W	Collaterally Neutral	Collaterally Sensitive	Collaterally Sensitive	Collaterally Sensitive	0.188880295744202	0.971362710543602	0.957523873364963	1	0.811119704255798	0.0286372894563975	0.0424761266350367	2.35023525457128e-38
161	A42Y	Collaterally Sensitive	Collaterally Neutral	Collaterally Sensitive	Collaterally Sensitive	0.999997588162211	0.300987460918397	0.996106711863957	0.999999903217776	2.41183778860268e-06	0.699012539081603	0.00389328813604258	9.67822240647805e-08
162	R43C	Collaterally Neutral	Collaterally Neutral	Collaterally Sensitive	Collaterally Sensitive	0.221112396237403	0.207035722166316	0.90674865338024	1	0.778887603762597	0.792964277833684	0.0932513466197595	3.04355263262559e-210
163	V44A	Collaterally Sensitive	Collaterally Neutral	Collaterally Neutral	Collaterally Sensitive	0.997742491462319	0.854549582770934	0.792740596913645	1	0.00225750853768078	0.145450417229066	0.207259403086355	3.64844555117825e-19
164	V44D	Collaterally Sensitive	Collaterally Sensitive	Collaterally Sensitive	Collaterally Sensitive	1	1	0.999027032887014	1	3.60333102545087e-132	0	0.000972967112985636	0
165	V44E	Collaterally Sensitive	Collaterally Sensitive	Collaterally Sensitive	Collaterally Sensitive	1	1	1	1	5.12919386462863e-17	0	1.05186273136591e-22	7.14243752703863e-35
166	V44Q	Collaterally Sensitive	Collaterally Sensitive	Collaterally Sensitive	Collaterally Sensitive	0.993270574526104	0.999999910145084	0.999999226058829	0.999999999999352	0.00672942547389575	8.98549158862857e-08	7.73941170590638e-07	6.48243364908185e-13
167	V44R	Collaterally Sensitive	Collaterally Sensitive	Collaterally Sensitive	Collaterally Sensitive	1	1	1	0.999732839294619	5.63154103228745e-47	0	0	0.000267160705380567
168	V44T	Collaterally Sensitive	Collaterally Sensitive	Collaterally Neutral	Collaterally Sensitive	1	0.995223665359729	0.705850446494775	0.999999868716559	3.36124687678422e-71	0.00477633464027095	0.294149553505225	1.31283441283578e-07
169	G45C	Collaterally Neutral	Collaterally Sensitive	Collaterally Sensitive	Collaterally Sensitive	0.447670988384255	0.985782055149683	0.999987916783727	0.999999996785271	0.552329011615745	0.0142179448503166	1.20832162732932e-05	3.21472930599535e-09
170	G45E	Collaterally Sensitive	Collaterally Sensitive	Collaterally Sensitive	Collaterally Sensitive	0.999999999999745	1	0.999999999944154	0.999999898181207	2.54552429451578e-13	5.07976974551311e-45	5.58456526349039e-11	1.01818792871735e-07
171	G45F	Collaterally Sensitive	Collaterally Sensitive	Collaterally Sensitive	Collaterally Sensitive	0.999995097193901	1	0.999999999882425	1	4.9028060986578e-06	0	1.17574807456332e-10	0
172	G45H	Collaterally Sensitive	Collaterally Sensitive	Collaterally Sensitive	Collaterally Sensitive	0.999999957448068	1	1	1	4.25519324649711e-08	1.16121691344906e-62	1.63709364478257e-174	8.85819791149733e-128
173	G45L	Collaterally Sensitive	Collaterally Sensitive	Collaterally Sensitive	Collaterally Sensitive	0.999999999999998	1	0.999997690612123	1	1.63127691908191e-15	2.28205017371705e-247	2.30938787702044e-06	3.3188515157683e-187
174	G45M	Collaterally Sensitive	Collaterally Sensitive	Collaterally Sensitive	Collaterally Sensitive	1	1	1	1	3.55328903356169e-21	0	6.29071658922627e-25	3.85599770518865e-30
175	G45N	Collaterally Sensitive	Collaterally Sensitive	Collaterally Sensitive	Collaterally Sensitive	0.999988668502389	0.999989323084799	1	0.999999999973129	1.13314976109413e-05	1.06769152009673e-05	2.89965903423377e-37	2.68709588114972e-11
176	G45Q	Collaterally Sensitive	Collaterally Sensitive	Collaterally Sensitive	Collaterally Sensitive	1	0.999998203760435	1	1	1.29922911056372e-59	1.79623956498538e-06	1.87709740076795e-162	1.08000372722142e-103
177	G45R	Collaterally Sensitive	Collaterally Sensitive	Collaterally Sensitive	Collaterally Sensitive	1	1	1	1	0	9.87848165596902e-21	1.6200864095185e-81	0
178	G45T	Collaterally Sensitive	Collaterally Sensitive	Collaterally Sensitive	Collaterally Sensitive	0.999678493791714	1	1	1	0.00032150620828562	3.53159886279082e-24	3.09590922040602e-49	2.8152537826982e-28
179	G45W	Collaterally Sensitive	Collaterally Sensitive	Collaterally Sensitive	Collaterally Sensitive	0.999999999980422	0.999999999975957	1	0.999999999997929	1.95779427194097e-11	2.40431612312299e-11	0	2.0705108296801e-12
180	Y46A	Collaterally Neutral	Collaterally Sensitive	Collaterally Sensitive	Collaterally Sensitive	0.836309895744764	0.945986680550594	1	0.999998351643305	0.163690104255236	0.0540133194494063	3.87854052708965e-27	1.64835669476048e-06
181	Y46C	Collaterally Sensitive	Collaterally Sensitive	Collaterally Sensitive	Collaterally Sensitive	1	0.999999996121373	1	0.999999999999947	3.98702663807698e-21	3.87862678784122e-09	0	5.32405887123569e-14
182	Y46D	Collaterally Sensitive	Collaterally Sensitive	Collaterally Sensitive	Collaterally Sensitive	1	0.999999999999977	1	1	8.14153565198534e-20	2.25144934966198e-14	7.31878000483596e-91	1.51698023141146e-22
183	Y46E	Collaterally Sensitive	Collaterally Sensitive	Collaterally Sensitive	Collaterally Sensitive	0.990941424078108	1	1	1	0.00905857592189179	1.29435610680849e-33	0	3.12832598362468e-228
184	Y46G	Collaterally Neutral	Collaterally Sensitive	Collaterally Sensitive	Collaterally Sensitive	0.841845865919119	0.999730903984878	1	1	0.158154134080881	0.000269096015121582	2.89756585745545e-36	8.22831952807214e-25
185	Y46H	Collaterally Neutral	Collaterally Neutral	Collaterally Sensitive	Collaterally Sensitive	0.84404787328472	0.454883786192549	0.999768710501311	0.999911723385112	0.15595212671528	0.545116213807451	0.000231289498688577	8.827661488845e-05
186	Y46K	Collaterally Sensitive	Collaterally Sensitive	Collaterally Sensitive	Collaterally Sensitive	1	1	1	1	5.65843843286831e-22	0	2.21882999476382e-73	0
187	Y46L	Collaterally Neutral	Collaterally Neutral	Collaterally Neutral	Collaterally Sensitive	0.695978042350318	0.520426041315375	0.688175184926991	0.999999674991925	0.304021957649682	0.479573958684625	0.311824815073009	3.25008074816948e-07
188	Y46M	Collaterally Resistant	Collaterally Neutral	Collaterally Neutral	Collaterally Sensitive	0.05967032844984	0.384783457267939	0.437682319740763	0.999432483002234	0.94032967155016	0.615216542732061	0.562317680259237	0.000567516997766057
189	Y46N	Collaterally Sensitive	Collaterally Sensitive	Collaterally Sensitive	Collaterally Sensitive	1	1	0.999989944077217	1	0	1.11853985788795e-32	1.00559227827391e-05	1.60995580312677e-24
190	Y46P	Collaterally Sensitive	Collaterally Sensitive	Collaterally Sensitive	Collaterally Sensitive	1	1	1	0.999999999999691	0	0	0	3.09084149006609e-13
191	Y46Q	Collaterally Sensitive	Collaterally Sensitive	Collaterally Sensitive	Collaterally Sensitive	0.981158403563545	1	1	1	0.0188415964364555	6.32417314623257e-95	3.01275416976589e-31	6.59892093871631e-122
192	Y46R	Collaterally Sensitive	Collaterally Sensitive	Collaterally Sensitive	Collaterally Sensitive	1	1	1	1	3.60091359365802e-120	1.79574976611458e-212	6.78034193364922e-27	1.74163865499855e-23
193	Y46S	Collaterally Sensitive	Collaterally Sensitive	Collaterally Sensitive	Collaterally Sensitive	0.967280785063417	1	0.999999999873809	0.999957210883645	0.0327192149365834	5.98608783865001e-297	1.2619118039735e-10	4.2789116354631e-05
194	Y46T	Collaterally Sensitive	Collaterally Sensitive	Collaterally Sensitive	Collaterally Sensitive	0.986526538990713	0.999992975264987	1	0.999998938099888	0.0134734610092866	7.02473501268016e-06	0	1.06190011213418e-06
195	Y46V	Collaterally Neutral	Collaterally Neutral	Collaterally Neutral	Collaterally Sensitive	0.417036856279432	0.468629488943909	0.665884254488614	0.999999999932006	0.582963143720568	0.531370511056091	0.334115745511386	6.79943920399856e-11
196	Y46W	Collaterally Resistant	Collaterally Sensitive	Collaterally Sensitive	Collaterally Sensitive	0.00190645301686077	1	0.999999635798169	0.999999999988862	0.998093546983139	5.94727699581359e-75	3.64201831464171e-07	1.11380946893848e-11
197	I47C	Collaterally Neutral	Collaterally Neutral	Collaterally Resistant	Collaterally Neutral	0.365437559293512	0.13425272734888	0.0247418057541059	0.742558396025116	0.634562440706488	0.86574727265112	0.975258194245894	0.257441603974884
198	I47D	Collaterally Neutral	Collaterally Sensitive	Collaterally Sensitive	Collaterally Sensitive	0.84303259984459	0.999609949972879	1	1	0.15696740015541	0.000390050027121297	2.20947213611292e-56	9.98045930163786e-45
199	I47E	Collaterally Sensitive	Collaterally Neutral	Collaterally Sensitive	Collaterally Sensitive	0.999999904157659	0.800241220646955	0.998669692939168	1	9.58423404695452e-08	0.199758779353045	0.00133030706083217	5.30540215353603e-122
200	I47N	Collaterally Neutral	Collaterally Sensitive	Collaterally Sensitive	Collaterally Sensitive	0.333590899179948	0.971708161552753	1	1	0.666409100820052	0.0282918384472468	1.37381889100287e-18	7.38523073033155e-47
201	E48A	Collaterally Neutral	Collaterally Neutral	Collaterally Resistant	Collaterally Neutral	0.232204305556748	0.328252982464874	0.0624315681778937	0.779842485275867	0.767795694443252	0.671747017535126	0.937568431822106	0.220157514724133
202	E48C	Collaterally Neutral	Collaterally Neutral	Collaterally Neutral	Collaterally Sensitive	0.385637649853064	0.696782227628149	0.860355611298611	1	0.614362350146936	0.303217772371851	0.139644388701389	3.77940212919478e-137
203	E48D	Collaterally Resistant	Collaterally Neutral	Collaterally Resistant	Collaterally Sensitive	0.103741984946542	0.739891335709825	0.00334466470768324	0.998476066848951	0.896258015053458	0.260108664290175	0.996655335292317	0.00152393315104917
204	E48G	Collaterally Resistant	Collaterally Sensitive	Collaterally Sensitive	Collaterally Sensitive	0.072131003201013	0.903673559998505	0.992745677697892	1	0.927868996798987	0.0963264400014952	0.00725432230210762	2.55541746292491e-74
205	E48I	Collaterally Resistant	Collaterally Resistant	Collaterally Resistant	Collaterally Sensitive	0.0304971980825591	0.000789643166775433	0.00107568592391916	0.999999975819413	0.969502801917441	0.999210356833225	0.998924314076081	2.41805867782375e-08
206	E48K	Collaterally Neutral	Collaterally Neutral	Collaterally Resistant	Collaterally Sensitive	0.464023681201834	0.757635952922373	0.114472298547878	0.999914583444256	0.535976318798166	0.242364047077627	0.885527701452122	8.54165557437806e-05
207	E48M	Collaterally Neutral	Collaterally Neutral	Collaterally Resistant	Collaterally Sensitive	0.297159663790294	0.560199455039041	0.0987050348349151	1	0.702840336209706	0.439800544960959	0.901294965165085	5.00068805070566e-35
208	E48N	Collaterally Neutral	Collaterally Sensitive	Collaterally Resistant	Collaterally Neutral	0.261723143044319	0.999993945646463	0.0737502545170251	0.483712048587017	0.738276856955681	6.05435353715656e-06	0.926249745482975	0.516287951412983
209	E48P	Collaterally Sensitive	Collaterally Sensitive	Collaterally Sensitive	Collaterally Sensitive	1	0.999999999999764	1	1	0	2.35987254524817e-13	2.40787036160701e-26	2.00442853414783e-109
210	E48R	Collaterally Neutral	Collaterally Sensitive	Collaterally Sensitive	Collaterally Sensitive	0.399690371297912	0.999999999978215	0.93657393468394	0.999909829507884	0.600309628702088	2.17847312946423e-11	0.0634260653160598	9.0170492116297e-05
211	E48S	Collaterally Neutral	Collaterally Sensitive	Collaterally Resistant	Collaterally Sensitive	0.497713538007297	0.999999999998566	0.00253645847973027	0.99565168006074	0.502286461992703	1.43379335715567e-12	0.99746354152027	0.00434831993925994
212	E48T	Collaterally Neutral	Collaterally Sensitive	Collaterally Resistant	Collaterally Sensitive	0.380721769059437	0.881636213209936	0.0034323004846446	0.999999999980772	0.619278230940563	0.118363786790064	0.996567699515355	1.92276206001549e-11
213	E48W	Collaterally Resistant	Collaterally Neutral	Collaterally Sensitive	Collaterally Sensitive	7.15901327108526e-09	0.575223465718722	0.983793061167698	1	0.999999992840987	0.424776534281278	0.0162069388323023	8.10203603108418e-40
214	L49A	Collaterally Neutral	Collaterally Neutral	Collaterally Neutral	Collaterally Sensitive	0.434784474764457	0.653790783190793	0.440714778590193	0.980701954112345	0.565215525235543	0.346209216809207	0.559285221409807	0.0192980458876553
215	L49C	Collaterally Neutral	Collaterally Neutral	Collaterally Neutral	Collaterally Sensitive	0.525430506443728	0.618354473046266	0.60259243606473	0.999129194995705	0.474569493556272	0.381645526953734	0.39740756393527	0.000870805004294869
216	L49D	Collaterally Sensitive	Collaterally Sensitive	Collaterally Sensitive	Collaterally Sensitive	0.923280807707254	0.999999115357394	1	0.999999999999728	0.0767191922927458	8.84642606167132e-07	3.28177309734808e-17	2.7233509993666e-13
217	L49E	Collaterally Neutral	Collaterally Resistant	Collaterally Neutral	Collaterally Sensitive	0.191755093937092	0	0.804446210760516	1	0.808244906062908	1	0.195553789239484	2.60623549427933e-17
218	L49F	Collaterally Resistant	Collaterally Neutral	Collaterally Neutral	Collaterally Sensitive	0.000196645025686837	0.52915050806189	0.757122259589919	0.999884033811092	0.999803354974313	0.47084949193811	0.242877740410081	0.000115966188907529
219	L49G	Collaterally Neutral	Collaterally Neutral	Collaterally Sensitive	Collaterally Sensitive	0.333049608429348	0.713698696892883	0.999999118008004	0.999999999187648	0.666950391570652	0.286301303107117	8.81991995710465e-07	8.12351888695167e-10
220	L49H	Collaterally Resistant	Collaterally Neutral	Collaterally Sensitive	Collaterally Sensitive	0.121009667156888	0.709206753155714	0.999999897312849	1	0.878990332843112	0.290793246844286	1.02687151376085e-07	4.23003398578032e-95
221	L49I	Collaterally Sensitive	Collaterally Neutral	Collaterally Neutral	Collaterally Neutral	0.919472664897762	0.487037716339845	0.454181505041654	0.388531582646698	0.0805273351022378	0.512962283660155	0.545818494958346	0.611468417353302
222	L49K	Collaterally Resistant	Collaterally Sensitive	Collaterally Sensitive	Collaterally Sensitive	0.0494026514353476	1	0.972686687423092	1	0.950597348564652	9.32486200338276e-104	0.0273133125769083	4.63447036208993e-150
223	L49M	Collaterally Neutral	Collaterally Neutral	Collaterally Sensitive	Collaterally Neutral	0.646459709379681	0.462138811544961	0.992255567569128	0.177401943074112	0.353540290620319	0.537861188455039	0.00774443243087208	0.822598056925888
224	L49N	Collaterally Resistant	Collaterally Sensitive	Collaterally Sensitive	Collaterally Sensitive	0.0208882353405531	0.988641185968724	0.999976123351253	1	0.979111764659447	0.0113588140312755	2.38766487466903e-05	3.05353513043775e-16
225	L49P	Collaterally Sensitive	Collaterally Sensitive	Collaterally Sensitive	Collaterally Sensitive	1	1	0.999999999999996	1	0	1.11986028736609e-27	3.9188659226577e-15	3.4960335860467e-23
226	L49Q	Collaterally Neutral	Collaterally Neutral	Collaterally Sensitive	Collaterally Sensitive	0.439820056912325	0.696072623308569	0.998829375766693	0.96895742772792	0.560179943087675	0.303927376691431	0.00117062423330663	0.0310425722720804
227	L49R	Collaterally Resistant	Collaterally Neutral	Collaterally Sensitive	Collaterally Sensitive	0.00926277162401956	0.810996033973305	0.999938458674439	0.99999444577181	0.99073722837598	0.189003966026695	6.1541325561416e-05	5.55422819012621e-06
228	L49S	Collaterally Neutral	Collaterally Neutral	Collaterally Neutral	Collaterally Sensitive	0.768617209654589	0.802411235134163	0.593051572386854	0.999999999981502	0.231382790345411	0.197588764865837	0.406948427613146	1.8497858910995e-11
229	L49T	Collaterally Neutral	Collaterally Sensitive	Collaterally Neutral	Collaterally Sensitive	0.668467385357597	0.946022351401583	0.779625913108629	0.983163051568549	0.331532614642403	0.0539776485984173	0.220374086891371	0.016836948431451
230	L49V	Collaterally Neutral	Collaterally Neutral	Collaterally Sensitive	Collaterally Neutral	0.338490591476154	0.557950612159307	0.998657565755876	0.165363171445291	0.661509408523846	0.442049387840693	0.00134243424412369	0.834636828554709
231	L49W	Collaterally Resistant	Collaterally Neutral	Collaterally Sensitive	Collaterally Sensitive	0.0782018197454365	0.762416724651851	0.998764881356432	1	0.921798180254564	0.237583275348149	0.00123511864356841	1.12317276091526e-95
232	L49Y	Collaterally Neutral	Collaterally Neutral	Collaterally Neutral	Collaterally Sensitive	0.454738889840795	0.858499904686281	0.840397707693095	0.999994944283868	0.545261110159205	0.141500095313719	0.159602292306905	5.05571613214657e-06
233	D50A	Collaterally Sensitive	Collaterally Sensitive	Collaterally Neutral	Collaterally Sensitive	0.897990398292371	0.944079574618	0.726037229596454	0.99653309339572	0.102009601707629	0.0559204253820002	0.273962770403546	0.00346690660427995
234	D50C	Collaterally Neutral	Collaterally Neutral	Collaterally Sensitive	Collaterally Sensitive	0.474022993575735	0.207492122939268	0.997574004983871	1	0.525977006424265	0.792507877060732	0.00242599501612936	8.58399179870322e-50
235	D50E	Collaterally Sensitive	Collaterally Sensitive	Collaterally Sensitive	Collaterally Sensitive	0.912289746391422	1	0.958559553840242	0.999999999999995	0.0877102536085777	1.08868660361351e-66	0.0414404461597575	4.52311967009234e-15
236	D50F	Collaterally Neutral	Collaterally Sensitive	Collaterally Sensitive	Collaterally Sensitive	0.833844383648755	0.89852523429054	1	1	0.166155616351245	0.10147476570946	9.41386983586422e-301	1.01870459945854e-100
237	D50G	Collaterally Sensitive	Collaterally Sensitive	Collaterally Sensitive	Collaterally Sensitive	1	0.998749352461028	0.999999998223187	1	0	0.00125064753897244	1.77681350615998e-09	4.66080385967399e-31
238	D50M	Collaterally Sensitive	Collaterally Sensitive	Collaterally Sensitive	Collaterally Sensitive	0.999986016736792	0.999999627636342	1	0.999999773285491	1.39832632076188e-05	3.7236365828765e-07	0	2.26714509023698e-07
239	D50Q	Collaterally Sensitive	Collaterally Sensitive	Collaterally Sensitive	Collaterally Sensitive	0.997531330070068	0.958810330732571	0.91765065639716	1	0.00246866992993243	0.0411896692674292	0.0823493436028397	2.62723450542999e-16
240	D50R	Collaterally Sensitive	Collaterally Sensitive	Collaterally Sensitive	Collaterally Sensitive	0.987474427503367	0.98067080633462	1	1	0.0125255724966332	0.0193291936653803	1.72608842067286e-23	2.60658161386332e-25
241	D50S	Collaterally Sensitive	Collaterally Sensitive	Collaterally Sensitive	Collaterally Sensitive	0.900955073294683	0.999999994334235	0.986462560515154	0.997977853409375	0.0990449267053168	5.66576454828201e-09	0.0135374394848464	0.0020221465906255
242	D50T	Collaterally Sensitive	Collaterally Neutral	Collaterally Sensitive	Collaterally Sensitive	0.999983923691757	0.653446566050319	0.999999596566996	0.99990312139555	1.60763082425779e-05	0.346553433949681	4.03433004187457e-07	9.68786044503064e-05
243	D50W	Collaterally Neutral	Collaterally Sensitive	Collaterally Sensitive	Collaterally Sensitive	0.738957784659013	0.984359125997287	1	1	0.261042215340987	0.0156408740027132	1.17215787941447e-189	1.50640896521132e-17
244	D50Y	Collaterally Sensitive	Collaterally Sensitive	Collaterally Sensitive	Collaterally Sensitive	0.999998336955373	0.99997567891361	1	1	1.66304462721408e-06	2.43210863899956e-05	1.31791691034262e-17	3.28545872896855e-89
245	L51A	Collaterally Resistant	Collaterally Resistant	Collaterally Neutral	Collaterally Sensitive	0.104259694164392	0	0.191926169725365	0.999603639994562	0.895740305835608	1	0.808073830274635	0.000396360005437627
246	L51C	Collaterally Resistant	Collaterally Neutral	Collaterally Sensitive	Collaterally Sensitive	0.0816897506217307	0.807569430083819	0.999999999998867	1	0.918310249378269	0.192430569916181	1.13299485734658e-12	5.09010080473482e-50
247	L51D	Collaterally Neutral	Collaterally Sensitive	Collaterally Sensitive	Collaterally Sensitive	0.680844118606517	0.999736303273782	0.992060830195104	0.999844573237216	0.319155881393483	0.000263696726218374	0.00793916980489608	0.000155426762784301
248	L51E	Collaterally Neutral	Collaterally Sensitive	Collaterally Sensitive	Collaterally Sensitive	0.630466982514972	1	0.999999986440917	0.999999999999934	0.369533017485028	1.59628958690401e-162	1.3559082771633e-08	6.620620209495e-14
249	L51F	Collaterally Resistant	Collaterally Neutral	Collaterally Neutral	Collaterally Sensitive	0.0523996305759776	0.838248835931261	0.659215686027789	1	0.947600369424022	0.161751164068739	0.340784313972211	3.2968516046251e-23
250	L51G	Collaterally Neutral	Collaterally Neutral	Collaterally Sensitive	Collaterally Sensitive	0.394680021205249	0.513313125733528	0.914491520943493	0.999954139720695	0.605319978794751	0.486686874266472	0.0855084790565068	4.58602793046674e-05
251	L51H	Collaterally Resistant	Collaterally Neutral	Collaterally Sensitive	Collaterally Sensitive	7.88258347483861e-14	0.175011238673642	0.998493645964103	0.999750081880762	0.999999999999921	0.824988761326358	0.00150635403589723	0.000249918119237674
252	L51I	Collaterally Resistant	Collaterally Neutral	Collaterally Resistant	Collaterally Resistant	0.0169710453934057	0.359860028058663	0.06686446686458	0.0183675892268811	0.983028954606594	0.640139971941337	0.93313553313542	0.981632410773119
253	L51K	Collaterally Neutral	Collaterally Neutral	Collaterally Sensitive	Collaterally Sensitive	0.815098396772196	0.733324845002943	0.965151682049881	0.999999998487504	0.184901603227804	0.266675154997057	0.0348483179501192	1.51249576455911e-09
254	L51M	Collaterally Neutral	Collaterally Neutral	Collaterally Neutral	Collaterally Resistant	0.439686597468079	0.641999819937263	0.522341042456553	0.00111414379479524	0.560313402531921	0.358000180062737	0.477658957543447	0.998885856205205
255	L51N	Collaterally Resistant	Collaterally Sensitive	Collaterally Sensitive	Collaterally Sensitive	0.0417246752522679	0.933145025479076	0.937509998454268	1	0.958275324747732	0.0668549745209244	0.0624900015457321	2.44606590662055e-18
256	L51P	Collaterally Resistant	Collaterally Neutral	Collaterally Sensitive	Collaterally Sensitive	0	0.584014629588819	0.919388227722699	1	1	0.415985370411181	0.0806117722773009	4.51588326401213e-19
257	L51Q	Collaterally Neutral	Collaterally Sensitive	Collaterally Neutral	Collaterally Sensitive	0.632567927029239	0.929895288235499	0.709243921828361	0.999999999999884	0.367432072970761	0.0701047117645012	0.290756078171639	1.16443999242503e-13
258	L51R	Collaterally Neutral	Collaterally Neutral	Collaterally Sensitive	Collaterally Sensitive	0.400694635946394	0.750220567296596	0.999120064090409	0.994856934917892	0.599305364053606	0.249779432703404	0.000879935909591234	0.00514306508210804
259	L51S	Collaterally Neutral	Collaterally Neutral	Collaterally Neutral	Collaterally Sensitive	0.646573079666234	0.695002522038854	0.457512950782943	0.999824606073449	0.353426920333766	0.304997477961146	0.542487049217057	0.000175393926550978
260	L51T	Collaterally Neutral	Collaterally Neutral	Collaterally Neutral	Collaterally Sensitive	0.387078379954015	0.742459633239885	0.285664916427146	0.99993230431201	0.612921620045985	0.257540366760115	0.714335083572854	6.76956879896371e-05
261	L51V	Collaterally Resistant	Collaterally Neutral	Collaterally Neutral	Collaterally Neutral	0.0422712373142331	0.375427821814538	0.523596151055653	0.790288194058762	0.957728762685767	0.624572178185462	0.476403848944347	0.209711805941238
262	L51W	Collaterally Neutral	Collaterally Neutral	Collaterally Resistant	Collaterally Neutral	0.576187557153582	0.137995696364011	0.0307477547673063	0.816439139461179	0.423812442846418	0.862004303635989	0.969252245232694	0.183560860538821
263	L51Y	Collaterally Resistant	Collaterally Neutral	Collaterally Neutral	Collaterally Sensitive	0.0467863406483309	0.367756756341775	0.545568892414335	0.999613576214329	0.953213659351669	0.632243243658225	0.454431107585665	0.000386423785670582
264	N52C	Collaterally Sensitive	Collaterally Neutral	Collaterally Neutral	Collaterally Sensitive	0.958356800023435	0.609223175771797	0.264109015257774	0.990087545759613	0.041643199976565	0.390776824228203	0.735890984742226	0.00991245424038682
265	N52F	Collaterally Sensitive	Collaterally Sensitive	Collaterally Sensitive	Collaterally Sensitive	1	0.983550693930879	0.999757150842344	0.999999999992988	2.90988875021963e-45	0.016449306069121	0.000242849157655778	7.01198956870239e-12
266	N52L	Collaterally Sensitive	Collaterally Neutral	Collaterally Neutral	Collaterally Sensitive	0.91512050252514	0.2760745623998	0.305887664336503	1	0.0848794974748598	0.7239254376002	0.694112335663497	5.09027702720504e-36
267	N52P	Collaterally Sensitive	Collaterally Sensitive	Collaterally Neutral	Collaterally Sensitive	0.999573441172867	0.999423903904404	0.533907190762489	0.999999295771844	0.000426558827133194	0.000576096095595796	0.466092809237511	7.0422815610531e-07
268	N52W	Collaterally Neutral	Collaterally Neutral	Collaterally Resistant	Collaterally Neutral	0.348921675165246	0.333078478352878	0.0116276961186313	0.73369807579831	0.651078324834754	0.666921521647122	0.988372303881369	0.26630192420169
269	S53A	Collaterally Resistant	Collaterally Neutral	Collaterally Neutral	Collaterally Sensitive	0	0.535684539034089	0.391277746064612	0.987327652230975	1	0.464315460965911	0.608722253935388	0.0126723477690248
270	S53C	Collaterally Neutral	Collaterally Neutral	Collaterally Sensitive	Collaterally Sensitive	0.238930541608052	0.817296545180218	0.961622797670759	1	0.761069458391948	0.182703454819782	0.0383772023292414	6.68269611626468e-22
271	S53D	Collaterally Neutral	Collaterally Resistant	Collaterally Resistant	Collaterally Resistant	0.124280119463307	9.36284502706108e-07	0.00123259521970565	0	0.875719880536693	0.999999063715497	0.998767404780294	1
272	S53E	Collaterally Neutral	Collaterally Resistant	Collaterally Neutral	Collaterally Sensitive	0.43334609737594	0.000203391674352127	0.548334837292932	0.99999126207259	0.56665390262406	0.999796608325648	0.451665162707068	8.73792741031372e-06
273	S53F	Collaterally Resistant	Collaterally Neutral	Collaterally Neutral	Collaterally Sensitive	1.95091720556206e-11	0.351620368803358	0.662932743427583	1	0.999999999980491	0.648379631196642	0.337067256572417	0
274	S53G	Collaterally Neutral	Collaterally Sensitive	Collaterally Neutral	Collaterally Sensitive	0.689641293307349	0.883259308109381	0.519683231745009	0.99987312838625	0.310358706692651	0.116740691890619	0.480316768254991	0.000126871613750394
275	S53I	Collaterally Resistant	Collaterally Sensitive	Collaterally Neutral	Collaterally Sensitive	0.0474095246198775	0.975841129311524	0.803636900946589	1	0.952590475380123	0.0241588706884759	0.196363099053411	0
276	S53K	Collaterally Neutral	Collaterally Sensitive	Collaterally Sensitive	Collaterally Sensitive	0.434506627314457	0.932096107999701	0.999989579910506	0.983345391141507	0.565493372685543	0.0679038920002986	1.04200894943844e-05	0.016654608858493
277	S53L	Collaterally Neutral	Collaterally Neutral	Collaterally Neutral	Collaterally Sensitive	0.238670498576995	0.538225781440524	0.584115977261093	1	0.761329501423005	0.461774218559476	0.415884022738907	6.26631505991747e-32
278	S53P	Collaterally Sensitive	Collaterally Sensitive	Collaterally Sensitive	Collaterally Sensitive	1	0.999948961725604	1	1	5.02415344815694e-17	5.10382743962747e-05	2.92645660767424e-67	1.69168424230333e-219
279	S53Q	Collaterally Neutral	Collaterally Sensitive	Collaterally Sensitive	Collaterally Sensitive	0.790059461588497	0.974274820816049	0.998942053002489	0.960358403398718	0.209940538411503	0.0257251791839512	0.00105794699751128	0.0396415966012822
280	S53R	Collaterally Neutral	Collaterally Sensitive	Collaterally Neutral	Collaterally Sensitive	0.467821350455813	0.952103307721727	0.72377090084065	0.993209099116815	0.532178649544187	0.0478966922782726	0.27622909915935	0.00679090088318521
281	S53T	Collaterally Sensitive	Collaterally Neutral	Collaterally Neutral	Collaterally Resistant	0.999555513206339	0.820751168220862	0.456415130654232	1.12317613987223e-07	0.000444486793660949	0.179248831779138	0.543584869345768	0.999999887682386
282	S53V	Collaterally Resistant	Collaterally Neutral	Collaterally Neutral	Collaterally Sensitive	0.113659917917522	0.344732124567712	0.311315257653811	0.999997211898755	0.886340082082478	0.655267875432288	0.688684742346189	2.78810124539669e-06
283	S53W	Collaterally Neutral	Collaterally Neutral	Collaterally Sensitive	Collaterally Sensitive	0.464602535905964	0.513985197701422	0.999998894221194	0.999126136237765	0.535397464094036	0.486014802298578	1.10577880612092e-06	0.000873863762234769
284	S53Y	Collaterally Neutral	Collaterally Neutral	Collaterally Resistant	Collaterally Sensitive	0.594049457442851	0.131361596421074	6.37124827984614e-06	1	0.405950542557149	0.868638403578926	0.99999362875172	2.1425068709105e-25
285	G54C	Collaterally Neutral	Collaterally Sensitive	Collaterally Sensitive	Collaterally Sensitive	0.426859690379001	0.93850104817791	1	0.999999994076385	0.573140309620999	0.0614989518220904	1.17769285019356e-99	5.92361528990352e-09
286	G54D	Collaterally Sensitive	Collaterally Resistant	Collaterally Neutral	Collaterally Sensitive	0.912058458895163	0.00810005187222862	0.872023351141148	0.999996591562239	0.0879415411048366	0.991899948127771	0.127976648858852	3.40843776105574e-06
287	G54I	Collaterally Sensitive	Collaterally Sensitive	Collaterally Sensitive	Collaterally Sensitive	0.924188217627706	0.999999563275553	1	0.999999087971449	0.0758117823722939	4.36724446613707e-07	3.6680078112254e-17	9.12028551484949e-07
288	G54W	Collaterally Neutral	Collaterally Neutral	Collaterally Sensitive	Collaterally Sensitive	0.755732878473136	0.464737302432088	0.995914796821201	0.999999999999797	0.244267121526864	0.535262697567912	0.00408520317879882	2.03010514546947e-13
289	K55C	Collaterally Neutral	Collaterally Neutral	Collaterally Resistant	Collaterally Sensitive	0.318154095668566	0.667129572920574	3.31290550548147e-13	0.999499536430087	0.681845904331434	0.332870427079426	0.999999999999669	0.000500463569913422
290	K55F	Collaterally Neutral	Collaterally Neutral	Collaterally Neutral	Collaterally Sensitive	0.524689081247051	0.283121806093434	0.701362044186059	0.991300323531095	0.475310918752949	0.716878193906566	0.298637955813941	0.00869967646890551
291	K55G	Collaterally Neutral	Collaterally Neutral	Collaterally Neutral	Collaterally Neutral	0.410255169947679	0.311779431667056	0.24132827569196	0.852421848681061	0.589744830052321	0.688220568332944	0.75867172430804	0.147578151318939
292	K55L	Collaterally Neutral	Collaterally Neutral	Collaterally Resistant	Collaterally Neutral	0.543369722035214	0.347360798514231	0.011330210457695	0.690029402802938	0.456630277964786	0.652639201485769	0.988669789542305	0.309970597197062
293	K55P	Collaterally Neutral	Collaterally Sensitive	Collaterally Sensitive	Collaterally Sensitive	0.620023191041616	0.987275640350739	1	0.997366907997636	0.379976808958384	0.0127243596492613	1.04478001042448e-17	0.00263309200236399
294	K55S	Collaterally Neutral	Collaterally Neutral	Collaterally Neutral	Collaterally Neutral	0.599551421461738	0.528069863659503	0.181136915513859	0.735585044375191	0.400448578538262	0.471930136340497	0.818863084486141	0.264414955624809
295	K55W	Collaterally Neutral	Collaterally Neutral	Collaterally Neutral	Collaterally Sensitive	0.805961350818438	0.634071514421017	0.540191274378489	0.962367183659847	0.194038649181562	0.365928485578983	0.459808725621511	0.0376328163401534
296	K55Y	Collaterally Neutral	Collaterally Neutral	Collaterally Resistant	Collaterally Sensitive	0.352682421691256	0.302930090729811	0.0919827727969409	0.985234082527381	0.647317578308744	0.697069909270189	0.908017227203059	0.0147659174726187
297	I56A	Collaterally Sensitive	Collaterally Neutral	Collaterally Resistant	Collaterally Sensitive	1	0.582709495672896	0.0659828859890197	0.984154132991089	0	0.417290504327104	0.93401711401098	0.0158458670089109
298	I56C	Collaterally Sensitive	Collaterally Sensitive	Collaterally Neutral	Collaterally Sensitive	0.998568477091008	0.999805998203461	0.617409199115211	0.999566264439975	0.00143152290899159	0.000194001796539043	0.382590800884789	0.000433735560024525
299	I56E	Collaterally Neutral	Collaterally Neutral	Collaterally Neutral	Collaterally Sensitive	0.730887089956407	0.779349755525309	0.316074314760692	0.989978717490354	0.269112910043593	0.22065024447469	0.683925685239308	0.0100212825096456
300	I56G	Collaterally Neutral	Collaterally Sensitive	Collaterally Sensitive	Collaterally Sensitive	0.838480919365779	1	0.998513919767081	1	0.161519080634221	1.54222147554686e-22	0.00148608023291847	3.85916835018828e-29
301	I56K	Collaterally Resistant	Collaterally Neutral	Collaterally Neutral	Collaterally Sensitive	0.000546994284152169	0.528349106771543	0.227416470414182	0.999980735929286	0.999453005715848	0.471650893228457	0.772583529585818	1.92640707143726e-05
302	I56N	Collaterally Neutral	Collaterally Neutral	Collaterally Neutral	Collaterally Sensitive	0.543575302149049	0.397941103560284	0.367367547276266	1	0.456424697850951	0.602058896439716	0.632632452723734	2.09970270955308e-40
303	I56P	Collaterally Neutral	Collaterally Neutral	Collaterally Neutral	Collaterally Sensitive	0.702496382997179	0.418386129185144	0.341543475977003	0.999200424208642	0.297503617002821	0.581613870814856	0.658456524022997	0.000799575791358013
304	I56Q	Collaterally Sensitive	Collaterally Neutral	Collaterally Resistant	Collaterally Sensitive	0.999998968592876	0.5251137075416	0.0341996038095105	0.982200375906749	1.03140712354985e-06	0.4748862924584	0.96580039619049	0.017799624093251
305	I56R	Collaterally Neutral	Collaterally Neutral	Collaterally Neutral	Collaterally Sensitive	0.714691734567923	0.576477936869002	0.409514276863787	0.978578699158692	0.285308265432077	0.423522063130998	0.590485723136213	0.0214213008413082
306	I56S	Collaterally Neutral	Collaterally Neutral	Collaterally Neutral	Collaterally Sensitive	0.638884499299803	0.651331950006239	0.47725097761762	0.999995861715808	0.361115500700197	0.348668049993761	0.52274902238238	4.13828419178554e-06
307	L57C	Collaterally Neutral	Collaterally Neutral	Collaterally Neutral	Collaterally Sensitive	0.49069980273065	0.487732328464539	0.528554705537289	1	0.50930019726935	0.512267671535461	0.471445294462711	8.54948073715684e-42
308	L57E	Collaterally Neutral	Collaterally Sensitive	Collaterally Sensitive	Collaterally Sensitive	0.599492636733615	0.980466261350995	0.995755170083693	0.999999999999814	0.400507363266385	0.0195337386490049	0.00424482991630679	1.85781473294933e-13
309	L57G	Collaterally Neutral	Collaterally Neutral	Collaterally Neutral	Collaterally Sensitive	0.405369675652981	0.513623848936342	0.441463272806714	1	0.594630324347019	0.486376151063658	0.558536727193286	0
310	L57M	Collaterally Neutral	Collaterally Neutral	Collaterally Sensitive	Collaterally Neutral	0.57810059157594	0.768408958277078	0.956807993111099	0.817611960132081	0.42189940842406	0.231591041722922	0.0431920068889006	0.182388039867919
311	L57N	Collaterally Resistant	Collaterally Neutral	Collaterally Neutral	Collaterally Sensitive	6.12044557923852e-07	0.370841770171884	0.159632267847132	0.969369780610001	0.999999387955442	0.629158229828116	0.840367732152868	0.0306302193899994
312	L57P	Collaterally Sensitive	Collaterally Sensitive	Collaterally Sensitive	Collaterally Sensitive	0.957284670436607	1	1	1	0.0427153295633933	0	0	7.42649293815692e-20
313	L57Q	Collaterally Resistant	Collaterally Neutral	Collaterally Resistant	Collaterally Sensitive	4.14880171467624e-05	0.562880672801102	0.000390969572259481	0.99070226797051	0.999958511982853	0.437119327198898	0.999609030427741	0.00929773202949018
314	L57S	Collaterally Neutral	Collaterally Neutral	Collaterally Neutral	Collaterally Sensitive	0.545801771498269	0.456171425655751	0.732021857502804	0.997926009710738	0.454198228501731	0.543828574344249	0.267978142497196	0.00207399028926189
315	L57T	Collaterally Neutral	Collaterally Neutral	Collaterally Neutral	Collaterally Sensitive	0.382661531043965	0.425832037349687	0.872126338812635	0.957089686099454	0.617338468956035	0.574167962650313	0.127873661187365	0.042910313900546
316	E58C	Collaterally Neutral	Collaterally Sensitive	Collaterally Sensitive	Collaterally Sensitive	0.726308712019998	0.999583001481871	0.95643413736195	1	0.273691287980002	0.000416998518129534	0.0435658626380504	3.14804480706756e-56
317	E58K	Collaterally Neutral	Collaterally Sensitive	Collaterally Neutral	Collaterally Sensitive	0.302130774971743	0.96120069236348	0.449317675039457	0.965517622189469	0.697869225028257	0.0387993076365202	0.550682324960543	0.0344823778105311
318	E58P	Collaterally Sensitive	Collaterally Sensitive	Collaterally Sensitive	Collaterally Sensitive	0.999999999999996	0.999999999999949	0.999999989198074	1	3.52192499450969e-15	5.07183272905466e-14	1.08019263154994e-08	2.47585319837965e-37
319	E58V	Collaterally Neutral	Collaterally Sensitive	Collaterally Neutral	Collaterally Sensitive	0.757706828225555	0.991627581001194	0.528830677587647	0.999998928125233	0.242293171774445	0.00837241899880566	0.471169322412353	1.07187476669284e-06
320	E58W	Collaterally Neutral	Collaterally Sensitive	Collaterally Sensitive	Collaterally Sensitive	0.631945379901493	0.921901603534178	0.998844051692847	0.999999998925931	0.368054620098507	0.0780983964658216	0.00115594830715306	1.07406928267578e-09
321	E58Y	Collaterally Neutral	Collaterally Neutral	Collaterally Sensitive	Collaterally Sensitive	0.181712108194906	0.293170717312841	0.998817268355905	1	0.818287891805094	0.706829282687159	0.00118273164409546	8.83574816598815e-166
322	S59A	Collaterally Neutral	Collaterally Neutral	Collaterally Neutral	Collaterally Neutral	0.56001264599567	0.187129864190132	0.513416324729661	0.400920415558272	0.43998735400433	0.812870135809868	0.486583675270339	0.599079584441728
323	S59C	Collaterally Neutral	Collaterally Neutral	Collaterally Sensitive	Collaterally Sensitive	0.60725537269825	0.815911059484748	0.999999762336162	0.999997876959485	0.39274462730175	0.184088940515252	2.3766383846758e-07	2.12304051538854e-06
324	S59D	Collaterally Neutral	Collaterally Neutral	Collaterally Neutral	Collaterally Sensitive	0.853290091951819	0.597210732967987	0.623653681303874	0.9856814378298	0.146709908048181	0.402789267032013	0.376346318696126	0.0143185621702003
325	S59E	Collaterally Neutral	Collaterally Sensitive	Collaterally Neutral	Collaterally Neutral	0.748550772380689	0.981574713105087	0.769421077570397	0.472353337517961	0.251449227619311	0.0184252868949125	0.230578922429603	0.527646662482039
326	S59F	Collaterally Neutral	Collaterally Resistant	Collaterally Neutral	Collaterally Sensitive	0.294470046545752	0	0.126200570187271	0.998095797494732	0.705529953454248	1	0.873799429812729	0.00190420250526787
327	S59G	Collaterally Neutral	Collaterally Neutral	Collaterally Neutral	Collaterally Neutral	0.406223132109775	0.68573903052509	0.681473297021121	0.688989313877864	0.593776867890225	0.31426096947491	0.318526702978879	0.311010686122136
328	S59H	Collaterally Sensitive	Collaterally Neutral	Collaterally Neutral	Collaterally Sensitive	0.999994081026229	0.506123503403832	0.738434229126983	0.999958448845857	5.91897377062459e-06	0.493876496596168	0.261565770873017	4.15511541427904e-05
329	S59I	Collaterally Sensitive	Collaterally Sensitive	Collaterally Sensitive	Collaterally Sensitive	0.88870105676687	0.931241969297272	0.879022853927306	1	0.11129894323313	0.0687580307027277	0.120977146072694	2.22974573170211e-21
330	S59K	Collaterally Neutral	Collaterally Neutral	Collaterally Resistant	Collaterally Neutral	0.3596831185712	0.691252957426589	0.0507536908661195	0.672406664864376	0.6403168814288	0.308747042573411	0.949246309133881	0.327593335135624
331	S59L	Collaterally Neutral	Collaterally Neutral	Collaterally Sensitive	Collaterally Sensitive	0.70667511831656	0.668472757586937	0.882875645482028	0.992259843397321	0.29332488168344	0.331527242413063	0.117124354517972	0.00774015660267943
332	S59M	Collaterally Sensitive	Collaterally Sensitive	Collaterally Sensitive	Collaterally Sensitive	0.999954039502349	0.951750116668208	0.942879756172686	1	4.59604976513388e-05	0.0482498833317919	0.0571202438273143	5.45713353001608e-17
333	S59N	Collaterally Sensitive	Collaterally Sensitive	Collaterally Sensitive	Collaterally Sensitive	0.98499787856534	0.954875747069596	0.997604218808905	0.986989109446269	0.0150021214346598	0.0451242529304041	0.00239578119109516	0.0130108905537305
334	S59P	Collaterally Sensitive	Collaterally Sensitive	Collaterally Sensitive	Collaterally Sensitive	0.897829075370667	0.999999626905697	1	1	0.102170924629333	3.73094302760592e-07	2.68334506713014e-287	2.76179311200344e-100
335	S59R	Collaterally Sensitive	Collaterally Neutral	Collaterally Neutral	Collaterally Sensitive	0.939243224897895	0.719658397772141	0.500598776538606	1	0.0607567751021049	0.280341602227859	0.499401223461394	1.0877696504738e-30
336	S59T	Collaterally Neutral	Collaterally Neutral	Collaterally Neutral	Collaterally Neutral	0.86072532019914	0.45315131904256	0.505534807914855	0.858569068522295	0.13927467980086	0.54684868095744	0.494465192085145	0.141430931477705
337	S59V	Collaterally Neutral	Collaterally Resistant	Collaterally Resistant	Collaterally Sensitive	0.676997968430309	0.00089073418945218	0.0379479316767399	0.998322073620351	0.323002031569691	0.999109265810548	0.96205206832326	0.0016779263796492
338	S59Y	Collaterally Neutral	Collaterally Neutral	Collaterally Neutral	Collaterally Sensitive	0.563842664329127	0.873654282749774	0.853477739875941	0.998489303184876	0.436157335670873	0.126345717250226	0.146522260124059	0.00151069681512431
339	F60A	Collaterally Neutral	Collaterally Resistant	Collaterally Neutral	Collaterally Sensitive	0.232292950903283	4.66318270220256e-07	0.290516683310614	1	0.767707049096717	0.99999953368173	0.709483316689386	9.42097131086997e-26
340	F60C	Collaterally Resistant	Collaterally Resistant	Collaterally Resistant	Collaterally Sensitive	0.112535800832392	2.04991579266789e-12	0.000423808816843785	0.999999999882421	0.887464199167608	0.99999999999795	0.999576191183156	1.17579265846796e-10
341	F60D	Collaterally Resistant	Collaterally Sensitive	Collaterally Sensitive	Collaterally Sensitive	3.30610094653183e-05	0.999544399386014	1	1	0.999966938990535	0.000455600613985876	0	1.23774564107171e-121
342	F60E	Collaterally Neutral	Collaterally Neutral	Collaterally Sensitive	Collaterally Sensitive	0.328185514692419	0.779341617304697	0.937092364222461	1	0.671814485307581	0.220658382695303	0.0629076357775393	0
343	F60G	Collaterally Neutral	Collaterally Neutral	Collaterally Sensitive	Collaterally Sensitive	0.165401260360948	0.144336003732443	0.946534863222335	0.999999999999546	0.834598739639052	0.855663996267557	0.0534651367776648	4.54413792084585e-13
344	F60H	Collaterally Neutral	Collaterally Neutral	Collaterally Neutral	Collaterally Neutral	0.500856053910257	0.670033350762218	0.442611849701743	0.42061835125208	0.499143946089743	0.329966649237782	0.557388150298257	0.57938164874792
345	F60I	Collaterally Neutral	Collaterally Neutral	Collaterally Resistant	Collaterally Sensitive	0.281129529592194	0.336460879166759	6.8318922602506e-06	0.99999997606417	0.718870470407806	0.663539120833241	0.99999316810774	2.39358298122661e-08
346	F60K	Collaterally Resistant	Collaterally Resistant	Collaterally Resistant	Collaterally Sensitive	0.00507470831633661	0.00931190930535819	0	1	0.994925291683663	0.990688090694642	1	3.0767231031694e-17
347	F60L	Collaterally Neutral	Collaterally Neutral	Collaterally Resistant	Collaterally Sensitive	0.171675915460978	0.360160915674465	1.8349627783909e-07	0.970274696093561	0.828324084539022	0.639839084325535	0.999999816503722	0.0297253039064395
348	F60N	Collaterally Resistant	Collaterally Neutral	Collaterally Resistant	Collaterally Neutral	0.000212040724306251	0.2061160596904	0.0644885147966869	0.309650320116251	0.999787959275694	0.7938839403096	0.935511485203313	0.690349679883749
349	F60P	Collaterally Sensitive	Collaterally Sensitive	Collaterally Sensitive	Collaterally Sensitive	1	1	1	1	1.29232306688221e-17	6.86455431383652e-71	0	7.35249884231524e-111
350	F60Q	Collaterally Neutral	Collaterally Resistant	Collaterally Neutral	Collaterally Sensitive	0.261337026338505	0.0570051153411527	0.183989174636841	0.986509478813334	0.738662973661495	0.942994884658847	0.816010825363159	0.0134905211866663
351	F60R	Collaterally Resistant	Collaterally Neutral	Collaterally Resistant	Collaterally Sensitive	0.00221731432453465	0.415227992793393	0	0.994724152184632	0.997782685675465	0.584772007206607	1	0.00527584781536838
352	F60S	Collaterally Neutral	Collaterally Neutral	Collaterally Resistant	Collaterally Sensitive	0.180837869297274	0.80676267628309	0.0476385366208906	0.997699395499547	0.819162130702726	0.19323732371691	0.952361463379109	0.00230060450045292
353	F60T	Collaterally Neutral	Collaterally Sensitive	Collaterally Neutral	Collaterally Sensitive	0.331198447573781	0.993683191876752	0.1848015323582	0.999858318724536	0.668801552426219	0.00631680812324841	0.8151984676418	0.00014168127546351
354	F60V	Collaterally Resistant	Collaterally Neutral	Collaterally Resistant	Collaterally Sensitive	0	0.273592851536074	6.02451422082595e-12	0.969400597634343	1	0.726407148463926	0.999999999993975	0.0305994023656565
355	F60W	Collaterally Neutral	Collaterally Resistant	Collaterally Resistant	Collaterally Resistant	0.133791605313531	5.25231005502613e-05	0.00608731622007286	0	0.866208394686469	0.99994747689945	0.993912683779927	1
356	F60Y	Collaterally Neutral	Collaterally Neutral	Collaterally Neutral	Collaterally Neutral	0.515025240312856	0.713894751534464	0.158569511736848	0.607576064910583	0.484974759687144	0.286105248465536	0.841430488263152	0.392423935089417
357	R61A	Collaterally Neutral	Collaterally Neutral	Collaterally Sensitive	Collaterally Sensitive	0.56966642856442	0.789907531959387	0.903028391182973	0.999999994582529	0.43033357143558	0.210092468040613	0.0969716088170274	5.41747109725016e-09
358	R61C	Collaterally Neutral	Collaterally Sensitive	Collaterally Sensitive	Collaterally Sensitive	0.435227296831325	0.998774103150887	0.999999999918559	0.999999999994703	0.564772703168675	0.0012258968491126	8.1440889758823e-11	5.29712496512476e-12
359	R61D	Collaterally Sensitive	Collaterally Sensitive	Collaterally Sensitive	Collaterally Sensitive	0.913923508552907	0.999740601773388	1	0.999999997480849	0.0860764914470926	0.000259398226612021	2.30747632900367e-20	2.51915120922036e-09
360	R61E	Collaterally Resistant	Collaterally Sensitive	Collaterally Sensitive	Collaterally Sensitive	0.0403808565466811	0.982955134694194	0.999999999984427	0.999999926729751	0.959619143453319	0.0170448653058056	1.55730078122295e-11	7.32702485128e-08
361	R61G	Collaterally Neutral	Collaterally Neutral	Collaterally Sensitive	Collaterally Sensitive	0.492702064939702	0.445325757873581	0.999604086068671	1	0.507297935060298	0.554674242126419	0.000395913931328949	6.06349300953064e-80
362	R61I	Collaterally Sensitive	Collaterally Sensitive	Collaterally Sensitive	Collaterally Sensitive	0.973358977334242	0.999999617168597	0.999986939814926	0.999990872603082	0.0266410226657579	3.82831403421644e-07	1.30601850736735e-05	9.12739691817525e-06
363	R61K	Collaterally Neutral	Collaterally Neutral	Collaterally Neutral	Collaterally Sensitive	0.275779184009915	0.519560332072083	0.444516063459156	0.927684661599884	0.724220815990085	0.480439667927917	0.555483936540844	0.0723153384001157
364	R61L	Collaterally Neutral	Collaterally Sensitive	Collaterally Sensitive	Collaterally Sensitive	0.386474151611908	0.999999999914783	0.999890706760377	1	0.613525848388092	8.52173248910546e-11	0.000109293239622972	5.36529250867989e-54
365	R61M	Collaterally Neutral	Collaterally Neutral	Collaterally Sensitive	Collaterally Sensitive	0.382434196472566	0.276511404978252	0.999024671830923	1	0.617565803527434	0.723488595021748	0.000975328169076681	0
366	R61P	Collaterally Sensitive	Collaterally Sensitive	Collaterally Sensitive	Collaterally Sensitive	1	1	0.999999999585439	0.999999296682767	1.62488553710613e-36	1.76511214759777e-33	4.14560758705316e-10	7.03317232754412e-07
367	R61S	Collaterally Resistant	Collaterally Resistant	Collaterally Sensitive	Collaterally Sensitive	0.0228235255428046	0.00690913072669452	0.919823265843691	0.999999999993599	0.977176474457195	0.993090869273305	0.0801767341563089	6.40075274313603e-12
368	R61T	Collaterally Neutral	Collaterally Sensitive	Collaterally Sensitive	Collaterally Sensitive	0.360954461496543	0.995921668937434	0.999999999644116	0.999999972060325	0.639045538503457	0.00407833106256564	3.55883905447766e-10	2.79396746560739e-08
369	R61V	Collaterally Sensitive	Collaterally Sensitive	Collaterally Sensitive	Collaterally Sensitive	0.880351751157011	1	0.999959766667621	0.998344158632807	0.119648248842989	9.19543083084429e-48	4.02333323790464e-05	0.00165584136719267
370	R61W	Collaterally Resistant	Collaterally Neutral	Collaterally Sensitive	Collaterally Sensitive	6.22489066726128e-06	0.628926748973153	0.998643901497053	0.999999999999999	0.999993775109333	0.371073251026847	0.00135609850294693	8.67567855660133e-16
371	R61Y	Collaterally Neutral	Collaterally Resistant	Collaterally Sensitive	Collaterally Sensitive	0.216234332891666	0	0.984325345407012	0.999999312951172	0.783765667108334	1	0.0156746545929881	6.8704882804033e-07
372	P62A	Collaterally Neutral	Collaterally Neutral	Collaterally Neutral	Collaterally Neutral	0.586056379597322	0.514899608300451	0.422952892836315	0.513776385527799	0.413943620402678	0.485100391699549	0.577047107163685	0.486223614472201
373	P62D	Collaterally Neutral	Collaterally Neutral	Collaterally Resistant	Collaterally Neutral	0.310141537529615	0.202364495815678	0.00446861915988817	0.456688495137706	0.689858462470385	0.797635504184322	0.995531380840112	0.543311504862294
374	P62E	Collaterally Neutral	Collaterally Neutral	Collaterally Neutral	Collaterally Neutral	0.315197262923663	0.677159553431364	0.448706662899515	0.374839992342901	0.684802737076337	0.322840446568636	0.551293337100485	0.625160007657099
375	P62F	Collaterally Resistant	Collaterally Neutral	Collaterally Neutral	Collaterally Sensitive	0	0.422553966445458	0.370201250267695	0.959427389104788	1	0.577446033554542	0.629798749732305	0.0405726108952125
376	P62G	Collaterally Neutral	Collaterally Sensitive	Collaterally Neutral	Collaterally Neutral	0.416610534302839	0.959626785300347	0.203368686921	0.62570294932383	0.583389465697161	0.0403732146996535	0.796631313079	0.37429705067617
377	P62I	Collaterally Resistant	Collaterally Neutral	Collaterally Neutral	Collaterally Neutral	0.00372179965054309	0.318707644846866	0.322917631447249	0.766437919952014	0.996278200349457	0.681292355153134	0.677082368552751	0.233562080047986
378	P62K	Collaterally Neutral	Collaterally Neutral	Collaterally Neutral	Collaterally Sensitive	0.235899016960051	0.206442133361625	0.416334883141569	0.999546434787226	0.764100983039949	0.793557866638375	0.583665116858431	0.000453565212773712
379	P62L	Collaterally Resistant	Collaterally Neutral	Collaterally Neutral	Collaterally Sensitive	0.0328610625532474	0.378249420094706	0.21657836332157	0.958638468224372	0.967138937446753	0.621750579905294	0.78342163667843	0.0413615317756278
380	P62M	Collaterally Neutral	Collaterally Neutral	Collaterally Neutral	Collaterally Neutral	0.356719333582869	0.543122250567146	0.403912228911997	0.245071061302346	0.643280666417131	0.456877749432854	0.596087771088003	0.754928938697654
381	P62N	Collaterally Resistant	Collaterally Neutral	Collaterally Resistant	Collaterally Sensitive	0.000301007436012912	0.411453789535987	0.000132023168174289	0.98946557592661	0.999698992563987	0.588546210464013	0.999867976831826	0.0105344240733897
382	P62Q	Collaterally Neutral	Collaterally Sensitive	Collaterally Neutral	Collaterally Neutral	0.163652698553193	0.963092794105446	0.443493146832184	0.430552715774016	0.836347301446807	0.0369072058945537	0.556506853167816	0.569447284225984
383	P62R	Collaterally Resistant	Collaterally Resistant	Collaterally Neutral	Collaterally Neutral	0.0371260256062454	0.0401903983189589	0.1502140263807	0.731640571241407	0.962873974393755	0.959809601681041	0.8497859736193	0.268359428758593
384	P62S	Collaterally Resistant	Collaterally Neutral	Collaterally Resistant	Collaterally Neutral	1.42465333163866e-06	0.573577861511391	4.77212025167262e-05	0.233617931565397	0.999998575346668	0.426422138488609	0.999952278797483	0.766382068434603
385	P62T	Collaterally Resistant	Collaterally Neutral	Collaterally Resistant	Collaterally Sensitive	0.0831702691545342	0.613638163083292	1.25118579227257e-05	1	0.916829730845466	0.386361836916708	0.999987488142077	1.6249185352498e-93
386	P62V	Collaterally Neutral	Collaterally Sensitive	Collaterally Neutral	Collaterally Sensitive	0.403028058947493	0.999127775283166	0.472024195381319	0.992174557547303	0.596971941052507	0.000872224716833621	0.527975804618681	0.00782544245269741
387	P62W	Collaterally Neutral	Collaterally Neutral	Collaterally Resistant	Collaterally Sensitive	0.163094476056533	0.816474689734914	0.090939860098703	0.999851367251776	0.836905523943467	0.183525310265086	0.909060139901297	0.000148632748223939
388	P62Y	Collaterally Neutral	Collaterally Neutral	Collaterally Sensitive	Collaterally Sensitive	0.51292396482076	0.75993252003172	0.999998653823462	0.986836617469547	0.48707603517924	0.24006747996828	1.34617653773376e-06	0.0131633825304534
389	E63A	Collaterally Neutral	Collaterally Neutral	Collaterally Neutral	Collaterally Neutral	0.597633654149501	0.233281298486849	0.229342995049777	0.583651953144433	0.402366345850499	0.766718701513151	0.770657004950223	0.416348046855567
390	E63C	Collaterally Resistant	Collaterally Neutral	Collaterally Sensitive	Collaterally Sensitive	0	0.369986962989251	0.990285080197914	0.954569851532445	1	0.630013037010749	0.00971491980208559	0.0454301484675546
391	E63D	Collaterally Sensitive	Collaterally Neutral	Collaterally Neutral	Collaterally Resistant	0.901794683305544	0.34458994636746	0.315806719963224	0.102544681789225	0.098205316694456	0.65541005363254	0.684193280036776	0.897455318210775
392	E63F	Collaterally Neutral	Collaterally Neutral	Collaterally Resistant	Collaterally Neutral	0.505130097671139	0.513360778444064	0.033031351067863	0.173641127094424	0.494869902328861	0.486639221555936	0.966968648932137	0.826358872905576
393	E63G	Collaterally Sensitive	Collaterally Sensitive	Collaterally Neutral	Collaterally Neutral	0.999949206812539	0.974538456147359	0.628949726126577	0.380491206156455	5.07931874608198e-05	0.0254615438526411	0.371050273873423	0.619508793843545
394	E63I	Collaterally Neutral	Collaterally Neutral	Collaterally Neutral	Collaterally Sensitive	0.611465535204697	0.407149764566549	0.281279592304766	0.999819271247008	0.388534464795303	0.592850235433451	0.718720407695234	0.000180728752992151
395	E63K	Collaterally Neutral	Collaterally Resistant	Collaterally Neutral	Collaterally Neutral	0.356159884107168	6.94878134241961e-05	0.201038611339453	0.188902201155623	0.643840115892832	0.999930512186576	0.798961388660547	0.811097798844377
396	E63L	Collaterally Sensitive	Collaterally Sensitive	Collaterally Neutral	Collaterally Sensitive	0.999998813387559	0.962810905410208	0.324694186953524	0.935929664417397	1.18661244078397e-06	0.0371890945897917	0.675305813046476	0.0640703355826031
397	E63M	Collaterally Neutral	Collaterally Resistant	Collaterally Neutral	Collaterally Neutral	0.217485521506331	4.72647788685165e-08	0.233837372095022	0.288672547168704	0.782514478493669	0.999999952735221	0.766162627904978	0.711327452831296
398	E63N	Collaterally Neutral	Collaterally Neutral	Collaterally Neutral	Collaterally Neutral	0.699004797142096	0.359224583375755	0.575304073200179	0.621223965356285	0.300995202857904	0.640775416624245	0.424695926799821	0.378776034643715
399	E63P	Collaterally Sensitive	Collaterally Sensitive	Collaterally Sensitive	Collaterally Sensitive	1	1	1	1	5.07152178694105e-18	4.21375032613691e-66	0	1.00429525319384e-104
400	E63Q	Collaterally Resistant	Collaterally Neutral	Collaterally Neutral	Collaterally Neutral	9.71859957510368e-07	0.219589943600667	0.242197699325714	0.318203477985727	0.999999028140042	0.780410056399333	0.757802300674286	0.681796522014273
401	E63R	Collaterally Sensitive	Collaterally Neutral	Collaterally Neutral	Collaterally Sensitive	0.999999344253883	0.269438102546829	0.505568540915992	0.999998629007471	6.55746116478505e-07	0.730561897453171	0.494431459084008	1.3709925289571e-06
402	E63S	Collaterally Neutral	Collaterally Neutral	Collaterally Neutral	Collaterally Neutral	0.859176091458902	0.355303091980215	0.255236451067515	0.370320701768919	0.140823908541098	0.644696908019785	0.744763548932485	0.629679298231081
403	E63T	Collaterally Sensitive	Collaterally Resistant	Collaterally Neutral	Collaterally Neutral	0.99999241938354	0.00408051816903476	0.127364947337678	0.828767118446412	7.58061646013745e-06	0.995919481830965	0.872635052662322	0.171232881553588
404	E63V	Collaterally Neutral	Collaterally Resistant	Collaterally Neutral	Collaterally Sensitive	0.353044518967813	6.3948846218409e-14	0.230249550197552	0.999883885411016	0.646955481032187	0.999999999999936	0.769750449802448	0.000116114588984057
405	E63W	Collaterally Sensitive	Collaterally Neutral	Collaterally Sensitive	Collaterally Neutral	0.999999999999811	0.5677116325102	0.999999955132376	0.628811401479512	1.89378519834583e-13	0.4322883674898	4.48676237702329e-08	0.371188598520488
406	E63Y	Collaterally Neutral	Collaterally Sensitive	Collaterally Resistant	Collaterally Neutral	0.363511677880926	1	0.0263416216864804	0.255633683532237	0.636488322119074	5.48186406238383e-18	0.97365837831352	0.744366316467763
407	E64C	Collaterally Sensitive	Collaterally Neutral	Collaterally Sensitive	Collaterally Sensitive	0.888041870835255	0.581839162547633	0.977950989355013	0.999999999999026	0.111958129164745	0.418160837452367	0.0220490106449871	9.74098754979056e-13
408	E64G	Collaterally Neutral	Collaterally Neutral	Collaterally Sensitive	Collaterally Sensitive	0.718181861684255	0.306080601817479	1	1	0.281818138315745	0.693919398182521	5.82429456254402e-80	3.17783608089053e-268
409	E64I	Collaterally Neutral	Collaterally Neutral	Collaterally Sensitive	Collaterally Sensitive	0.676816561958531	0.790499621479411	1	1	0.323183438041469	0.209500378520589	1.06859929860788e-27	6.47487129905592e-51
410	E64K	Collaterally Neutral	Collaterally Sensitive	Collaterally Sensitive	Collaterally Sensitive	0.835912295281833	0.936186874320371	0.999805930070914	1	0.164087704718167	0.0638131256796289	0.000194069929086063	6.52403950789863e-38
411	E64N	Collaterally Neutral	Collaterally Neutral	Collaterally Sensitive	Collaterally Sensitive	0.700439755368526	0.754542849322031	0.999447535062702	0.996744526909168	0.299560244631474	0.245457150677969	0.000552464937297767	0.00325547309083184
412	E64P	Collaterally Sensitive	Collaterally Sensitive	Collaterally Sensitive	Collaterally Sensitive	0.999999990233593	1	1	1	9.76640696798323e-09	8.83443132168197e-35	2.4125087428836e-104	4.01114692255547e-86
413	E64R	Collaterally Neutral	Collaterally Neutral	Collaterally Sensitive	Collaterally Sensitive	0.653088803793983	0.496350627740623	0.998085604019564	0.99998456839439	0.346911196206017	0.503649372259377	0.00191439598043641	1.54316056103345e-05
414	E64V	Collaterally Sensitive	Collaterally Neutral	Collaterally Sensitive	Collaterally Sensitive	0.975679486630988	0.599259525680483	0.976796404043854	0.988146986388002	0.024320513369012	0.400740474319517	0.0232035959561458	0.0118530136119983
415	R65A	Collaterally Resistant	Collaterally Sensitive	Collaterally Sensitive	Collaterally Sensitive	0	0.979794314343458	0.892953110250422	0.999190631416821	1	0.0202056856565417	0.107046889749578	0.000809368583179104
416	R65C	Collaterally Neutral	Collaterally Resistant	Collaterally Sensitive	Collaterally Sensitive	0.1912922530631	0.000736990753451461	0.999990168375361	1	0.8087077469369	0.999263009246549	9.83162463871286e-06	0
417	R65D	Collaterally Neutral	Collaterally Sensitive	Collaterally Sensitive	Collaterally Sensitive	0.189578309235684	0.999580147634915	0.99993551903245	0.999999999999999	0.810421690764316	0.000419852365085417	6.44809675496455e-05	1.373484297067e-15
418	R65E	Collaterally Neutral	Collaterally Neutral	Collaterally Neutral	Collaterally Sensitive	0.198472922561533	0.798699304640943	0.750231559692434	0.999999999941964	0.801527077438467	0.201300695359058	0.249768440307566	5.80358344554232e-11
419	R65G	Collaterally Resistant	Collaterally Neutral	Collaterally Sensitive	Collaterally Sensitive	0.0315228243090123	0.771321152410374	0.972427439037978	0.999999999984788	0.968477175690988	0.228678847589626	0.0275725609620216	1.5212249687765e-11
420	R65H	Collaterally Neutral	Collaterally Sensitive	Collaterally Sensitive	Collaterally Sensitive	0.669029818723308	1	0.982042660308872	0.999668056053376	0.330970181276692	0	0.0179573396911284	0.000331943946624389
421	R65I	Collaterally Neutral	Collaterally Neutral	Collaterally Neutral	Collaterally Sensitive	0.506580345255344	0.138096053154748	0.685831819560212	0.935252265873548	0.493419654744656	0.861903946845252	0.314168180439788	0.0647477341264521
422	R65K	Collaterally Resistant	Collaterally Neutral	Collaterally Neutral	Collaterally Sensitive	0.0121035948379604	0.610381943915222	0.733956196258475	0.999999999996783	0.98789640516204	0.389618056084778	0.266043803741525	3.21676588647788e-12
423	R65M	Collaterally Resistant	Collaterally Neutral	Collaterally Neutral	Collaterally Sensitive	0.00114769765150458	0.616336883498564	0.79834731964563	0.999999999999321	0.998852302348495	0.383663116501436	0.20165268035437	6.78640835585711e-13
424	R65Q	Collaterally Resistant	Collaterally Neutral	Collaterally Neutral	Collaterally Sensitive	0.000220578861849896	0.706287497222366	0.67561420549063	0.996974324086741	0.99977942113815	0.293712502777634	0.32438579450937	0.00302567591325889
425	R65S	Collaterally Resistant	Collaterally Sensitive	Collaterally Sensitive	Collaterally Sensitive	0.00158589872572301	0.995315097079528	0.950464480842756	0.999566509696858	0.998414101274277	0.00468490292047148	0.0495355191572443	0.000433490303142305
426	R65T	Collaterally Resistant	Collaterally Resistant	Collaterally Neutral	Collaterally Sensitive	2.81083426922901e-06	0.0153641222483113	0.36984249775186	0.99758965469978	0.999997189165731	0.984635877751689	0.63015750224814	0.00241034530022033
427	F66A	Collaterally Sensitive	Collaterally Sensitive	Collaterally Sensitive	Collaterally Sensitive	1	1	1	0.999977258614715	2.71150124245007e-16	2.99429414019289e-91	1.07303671497912e-158	2.27413852845332e-05
428	F66C	Collaterally Sensitive	Collaterally Sensitive	Collaterally Sensitive	Collaterally Sensitive	0.931806660704053	1	0.998999206967404	0.999999999999968	0.0681933392959467	4.8471167822718e-19	0.00100079303259584	3.17020865729798e-14
429	F66D	Collaterally Sensitive	Collaterally Sensitive	Collaterally Sensitive	Collaterally Sensitive	1	1	1	0.999882782603437	1.16334019166544e-147	1.58625374093601e-27	7.05003952189958e-21	0.000117217396563232
430	F66E	Collaterally Sensitive	Collaterally Sensitive	Collaterally Sensitive	Collaterally Sensitive	1	1	1	0.999999998757805	1.6970063452551e-101	1.95017391240809e-75	2.24111915822095e-116	1.24219530599423e-09
431	F66G	Collaterally Sensitive	Collaterally Sensitive	Collaterally Sensitive	Collaterally Sensitive	1	1	1	0.999999999999301	4.49001306969288e-18	1.44141722537459e-21	4.14844238465605e-63	6.99209726266903e-13
432	F66H	Collaterally Sensitive	Collaterally Sensitive	Collaterally Sensitive	Collaterally Sensitive	0.998162791737872	1	1	1	0.00183720826212815	2.37091905751994e-34	1.82027192137719e-18	1.48936860580268e-36
433	F66I	Collaterally Resistant	Collaterally Sensitive	Collaterally Sensitive	Collaterally Sensitive	0.0788180383255264	0.981822184891231	1	1	0.921181961674474	0.0181778151087687	1.0007790483651e-66	0
434	F66K	Collaterally Sensitive	Collaterally Sensitive	Collaterally Sensitive	Collaterally Sensitive	0.999999984305858	0.999999999999897	1	0.999999872699736	1.56941418402903e-08	1.03294708334079e-13	0	1.27300264014432e-07
435	F66L	Collaterally Neutral	Collaterally Sensitive	Collaterally Sensitive	Collaterally Sensitive	0.393892757345831	0.996414160020522	1	0.999827712251296	0.606107242654169	0.00358583997947842	2.08653340839291e-54	0.000172287748704072
436	F66N	Collaterally Sensitive	Collaterally Sensitive	Collaterally Sensitive	Collaterally Sensitive	0.9999999999968	0.999008467012486	0.999999995678614	0.999999999957497	3.19987876749698e-12	0.000991532987513852	4.32138563623993e-09	4.25029928094887e-11
437	F66P	Collaterally Sensitive	Collaterally Sensitive	Collaterally Sensitive	Collaterally Sensitive	1	1	1	1	1.44860661633797e-22	0	2.24017141403203e-46	0
438	F66Q	Collaterally Resistant	Collaterally Sensitive	Collaterally Sensitive	Collaterally Sensitive	5.97577543004491e-12	0.999999921002695	1	1	0.999999999994024	7.89973048425581e-08	4.77577531943442e-25	0
439	F66R	Collaterally Sensitive	Collaterally Sensitive	Collaterally Sensitive	Collaterally Sensitive	1	0.999999999999848	1	0.999999999999901	1.48029284385132e-254	1.51516540862726e-13	6.22459599935061e-218	9.87824667581886e-14
440	F66S	Collaterally Sensitive	Collaterally Sensitive	Collaterally Sensitive	Collaterally Sensitive	1	0.999999999999473	1	1	2.50158837703963e-51	5.2661140595408e-13	1.33965386796069e-27	0
441	F66T	Collaterally Sensitive	Collaterally Sensitive	Collaterally Sensitive	Collaterally Sensitive	0.938096464076308	1	1	1	0.0619035359236916	7.5308633163562e-38	2.78517834350795e-32	5.56711896064887e-78
442	F66V	Collaterally Neutral	Collaterally Sensitive	Collaterally Sensitive	Collaterally Sensitive	0.577377680937758	0.942280514901106	0.935713626910317	1	0.422622319062242	0.0577194850988944	0.0642863730896829	2.74732199975199e-255
443	F66W	Collaterally Neutral	Collaterally Sensitive	Collaterally Sensitive	Collaterally Sensitive	0.544069968745225	1	0.999999852606883	1	0.455930031254775	6.87077531565638e-19	1.47393116698067e-07	0
444	P67A	Collaterally Neutral	Collaterally Neutral	Collaterally Resistant	Collaterally Sensitive	0.224931725535635	0.253819084168653	1.91510933987837e-05	1	0.775068274464365	0.746180915831347	0.999980848906601	0
445	P67C	Collaterally Resistant	Collaterally Sensitive	Collaterally Sensitive	Collaterally Sensitive	0.0434696259542903	0.995598998270422	1	0.999993683754648	0.95653037404571	0.00440100172957825	1.45352429508045e-24	6.31624535199532e-06
446	P67D	Collaterally Sensitive	Collaterally Sensitive	Collaterally Sensitive	Collaterally Sensitive	0.992388641817172	1	0.99999999999999	0.999999999390436	0.00761135818282759	1.15552331227964e-18	1.0289727398315e-14	6.09564052557281e-10
447	P67F	Collaterally Neutral	Collaterally Sensitive	Collaterally Sensitive	Collaterally Sensitive	0.614980195101675	0.956480003079221	0.990251618549888	0.999999999999392	0.385019804898325	0.0435199969207788	0.00974838145011241	6.0753563765915e-13
448	P67G	Collaterally Neutral	Collaterally Neutral	Collaterally Sensitive	Collaterally Sensitive	0.618193788503583	0.81416301545154	0.999958031032819	0.999999999697404	0.381806211496417	0.18583698454846	4.19689671810446e-05	3.02595967984193e-10
449	P67H	Collaterally Resistant	Collaterally Neutral	Collaterally Sensitive	Collaterally Sensitive	0	0.774728153151335	0.996836828662078	1	1	0.225271846848665	0.00316317133792159	1.4177552722228e-60
450	P67I	Collaterally Neutral	Collaterally Neutral	Collaterally Sensitive	Collaterally Sensitive	0.28388848022472	0.259228669662445	0.999291437900271	0.999961944253157	0.71611151977528	0.740771330337555	0.000708562099729042	3.80557468425625e-05
451	P67L	Collaterally Neutral	Collaterally Sensitive	Collaterally Sensitive	Collaterally Sensitive	0.339992714809507	0.991766296909067	0.999999999999996	1	0.660007285190493	0.00823370309093308	4.06368217417805e-15	0
452	P67M	Collaterally Resistant	Collaterally Sensitive	Collaterally Sensitive	Collaterally Sensitive	0.0175727530331091	0.997547266393493	1	0.999666048434369	0.982427246966891	0.00245273360650679	0	0.000333951565630814
453	P67N	Collaterally Neutral	Collaterally Resistant	Collaterally Sensitive	Collaterally Sensitive	0.718955517064636	0.00416125686565672	0.968788420096486	0.999983586266542	0.281044482935364	0.995838743134343	0.0312115799035137	1.64137334575996e-05
454	P67Q	Collaterally Sensitive	Collaterally Sensitive	Collaterally Sensitive	Collaterally Sensitive	1	0.998334129214697	1	1	1.38333956808936e-24	0.00166587078530324	4.04684507758213e-68	0
455	P67R	Collaterally Sensitive	Collaterally Sensitive	Collaterally Sensitive	Collaterally Sensitive	1	1	1	1	1.41615060875009e-23	3.23416980814257e-38	1.7165363666222e-71	8.740953158792e-78
456	P67S	Collaterally Neutral	Collaterally Resistant	Collaterally Sensitive	Collaterally Sensitive	0.644752204460764	0	0.986353101949295	0.999895967586006	0.355247795539236	1	0.0136468980507048	0.000104032413993865
457	P67T	Collaterally Sensitive	Collaterally Neutral	Collaterally Sensitive	Collaterally Sensitive	1	0.594791075824907	0.999892584536381	1	2.33220423055224e-21	0.405208924175093	0.000107415463619399	7.44664161235548e-32
458	P67V	Collaterally Resistant	Collaterally Resistant	Collaterally Sensitive	Collaterally Sensitive	0.0068877335657066	1.60247977110117e-08	0.948268074871776	0.99997779873119	0.993112266434293	0.999999983975202	0.0517319251282244	2.22012688102159e-05
459	P67W	Collaterally Sensitive	Collaterally Sensitive	Collaterally Sensitive	Collaterally Sensitive	0.967110100791814	1	1	0.999999999997215	0.0328898992081857	0	7.10362494458983e-29	2.78539000458849e-12
460	P67Y	Collaterally Resistant	Collaterally Sensitive	Collaterally Sensitive	Collaterally Sensitive	0.00599017023189596	0.99807777656261	1	0.999999999582043	0.994009829768104	0.00192222343739039	7.09230966101472e-23	4.17957028082378e-10
461	M68A	Collaterally Resistant	Collaterally Neutral	Collaterally Neutral	Collaterally Sensitive	0.121279409748891	0.33456115251713	0.259954899420379	0.999999859832263	0.878720590251109	0.66543884748287	0.740045100579621	1.40167737422874e-07
462	M68C	Collaterally Neutral	Collaterally Neutral	Collaterally Neutral	Collaterally Sensitive	0.393372041678712	0.83931504831216	0.456457973714914	1	0.606627958321288	0.16068495168784	0.543542026285086	0
463	M68D	Collaterally Sensitive	Collaterally Sensitive	Collaterally Sensitive	Collaterally Sensitive	1	1	1	1	2.85798063308923e-27	2.90948007325703e-65	2.30319336752736e-46	4.12614697495947e-20
464	M68E	Collaterally Neutral	Collaterally Sensitive	Collaterally Sensitive	Collaterally Sensitive	0.818028702995754	0.999977421571319	0.999999999999999	0.999833315739204	0.181971297004246	2.25784286805631e-05	1.15074034309937e-15	0.000166684260795749
465	M68F	Collaterally Resistant	Collaterally Neutral	Collaterally Neutral	Collaterally Sensitive	0	0.551974255464691	0.423011358522563	0.99444973240709	1	0.448025744535309	0.576988641477437	0.00555026759291041
466	M68G	Collaterally Neutral	Collaterally Neutral	Collaterally Sensitive	Collaterally Sensitive	0.377297660386349	0.487114694915085	1	1	0.622702339613651	0.512885305084915	0	1.01752990520795e-16
467	M68H	Collaterally Neutral	Collaterally Sensitive	Collaterally Sensitive	Collaterally Sensitive	0.484306163397996	0.999890296774929	0.999182891235681	1	0.515693836602004	0.000109703225070717	0.000817108764318614	2.51556357730358e-24
468	M68K	Collaterally Sensitive	Collaterally Sensitive	Collaterally Sensitive	Collaterally Sensitive	0.999999999997262	1	1	0.99957520538734	2.73786157412769e-12	1.55441720971082e-52	6.0917398163819e-126	0.000424794612660135
469	M68N	Collaterally Sensitive	Collaterally Sensitive	Collaterally Sensitive	Collaterally Sensitive	1	0.999997726304109	1	1	0	2.273695891364e-06	0	0
470	M68P	Collaterally Sensitive	Collaterally Sensitive	Collaterally Sensitive	Collaterally Sensitive	0.999945236467144	1	1	1	5.47635328560467e-05	9.98716589280876e-53	2.17123433572903e-88	4.54947457066477e-19
471	M68Q	Collaterally Resistant	Collaterally Neutral	Collaterally Sensitive	Collaterally Sensitive	0.00918940522172362	0.333199343466603	0.999999999999996	0.999999889493967	0.990810594778276	0.666800656533397	3.58302121611924e-15	1.10506032600585e-07
472	M68R	Collaterally Sensitive	Collaterally Sensitive	Collaterally Sensitive	Collaterally Sensitive	1	1	1	1	3.38132365805199e-75	2.23467489345551e-107	8.97561579631337e-239	5.29269068427983e-25
473	M68S	Collaterally Resistant	Collaterally Neutral	Collaterally Sensitive	Collaterally Sensitive	1.04513210530399e-05	0.273995520978334	0.999465060802613	1	0.999989548678947	0.726004479021666	0.000534939197387383	2.84837730242891e-18
474	M68T	Collaterally Resistant	Collaterally Neutral	Collaterally Neutral	Collaterally Sensitive	0.102933043537641	0.176910020629121	0.454755464043061	1	0.897066956462359	0.823089979370879	0.545244535956939	0
475	M68W	Collaterally Sensitive	Collaterally Sensitive	Collaterally Sensitive	Collaterally Sensitive	0.99999645631958	1	1	1	3.5436804204593e-06	5.66397425283926e-79	2.70761833204888e-54	2.0547318257812e-186
476	M68Y	Collaterally Neutral	Collaterally Neutral	Collaterally Sensitive	Collaterally Sensitive	0.875114156961239	0.22260303359617	0.995200341701381	0.994637317959868	0.124885843038761	0.77739696640383	0.004799658298619	0.00536268204013194
477	M69A	Collaterally Resistant	Collaterally Resistant	Collaterally Resistant	Collaterally Neutral	0.0119880371995873	0.104654237027538	1.04552211332987e-09	0.551100422109298	0.988011962800413	0.895345762972462	0.999999998954478	0.448899577890702
478	M69C	Collaterally Neutral	Collaterally Sensitive	Collaterally Neutral	Collaterally Sensitive	0.788691153362507	0.970014325573665	0.727628844858701	0.960043315230546	0.211308846637493	0.0299856744263347	0.272371155141299	0.0399566847694539
479	M69D	Collaterally Resistant	Collaterally Resistant	Collaterally Neutral	Collaterally Sensitive	7.70432309703528e-05	0	0.728173618724717	0.99995810411116	0.99992295676903	1	0.271826381275283	4.18958888404159e-05
480	M69H	Collaterally Resistant	Collaterally Resistant	Collaterally Resistant	Collaterally Sensitive	2.25678677512331e-06	0	0.0566342182459962	0.999532372994635	0.999997743213225	1	0.943365781754004	0.000467627005364575
481	M69K	Collaterally Sensitive	Collaterally Sensitive	Collaterally Sensitive	Collaterally Sensitive	0.880062462900071	0.999999999999901	0.999989672509174	0.99991868465106	0.119937537099929	9.92344860752346e-14	1.03274908263556e-05	8.13153489395202e-05
482	M69N	Collaterally Resistant	Collaterally Neutral	Collaterally Neutral	Collaterally Sensitive	2.60538556350332e-05	0.237819851380368	0.139124131521234	1	0.999973946144365	0.762180148619632	0.860875868478766	4.59376200592638e-54
483	M69P	Collaterally Sensitive	Collaterally Sensitive	Collaterally Sensitive	Collaterally Sensitive	1	0.999999972189686	1	1	3.57168852040723e-24	2.78103140944524e-08	0	3.38319082195853e-38
484	M69Q	Collaterally Neutral	Collaterally Sensitive	Collaterally Neutral	Collaterally Sensitive	0.616812237816865	0.979712596541686	0.125890922163815	0.963123738182994	0.383187762183135	0.0202874034583136	0.874109077836185	0.036876261817006
485	M69R	Collaterally Sensitive	Collaterally Sensitive	Collaterally Sensitive	Collaterally Sensitive	0.999999766566096	1	1	1	2.3343390416531e-07	0	0	1.88171700422944e-33
486	S70F	Collaterally Sensitive	Collaterally Sensitive	Collaterally Sensitive	Collaterally Sensitive	1	0.999979617576764	0.99999929453379	0.999999993688415	6.04262251240058e-175	2.03824232359631e-05	7.05466210075435e-07	6.31158501865931e-09
487	S70I	Collaterally Sensitive	Collaterally Sensitive	Collaterally Sensitive	Collaterally Sensitive	1	0.999999378993369	1	1	0	6.21006631304998e-07	0	9.45014703413488e-157
488	S70K	Collaterally Sensitive	Collaterally Sensitive	Collaterally Sensitive	Collaterally Sensitive	0.999998451199085	1	0.999999999998909	0.999999999976998	1.54880091486502e-06	9.8758376002101e-18	1.09112257381626e-12	2.30021496933108e-11
489	S70L	Collaterally Sensitive	Collaterally Sensitive	Collaterally Sensitive	Collaterally Sensitive	1	0.999999473756855	1	1	1.81379653632482e-24	5.26243144873975e-07	3.21866542571129e-160	1.07639769187738e-38
490	S70M	Collaterally Sensitive	Collaterally Sensitive	Collaterally Sensitive	Collaterally Sensitive	1	0.999999999983039	0.999999999866108	0.99999998304501	8.31463044724145e-17	1.69606516335407e-11	1.33892031088079e-10	1.69549900294082e-08
491	S70R	Collaterally Sensitive	Collaterally Sensitive	Collaterally Sensitive	Collaterally Sensitive	1	1	1	0.999999999994517	6.84976334460998e-27	2.30984523494782e-23	0	5.48262758952831e-12
492	S70V	Collaterally Sensitive	Collaterally Sensitive	Collaterally Sensitive	Collaterally Sensitive	0.999999959870855	0.999999999818367	1	1	4.01291452358747e-08	1.81633154013817e-10	6.40073698468651e-55	0
493	S70W	Collaterally Sensitive	Collaterally Sensitive	Collaterally Sensitive	Collaterally Sensitive	1	0.999893193573636	1	0.999999999971806	0	0.000106806426364119	1.02945893273994e-36	2.81942654948099e-11
494	S70Y	Collaterally Sensitive	Collaterally Sensitive	Collaterally Sensitive	Collaterally Sensitive	1	1	1	0.999999999654577	2.34589491640958e-144	0	2.63331854394777e-29	3.45422534991779e-10
495	T71C	Collaterally Resistant	Collaterally Neutral	Collaterally Sensitive	Collaterally Sensitive	0.00282787953468577	0.408690239952208	0.943845742198817	1	0.997172120465314	0.591309760047792	0.0561542578011834	5.74709913489281e-17
496	T71E	Collaterally Sensitive	Collaterally Sensitive	Collaterally Sensitive	Collaterally Sensitive	0.888981787998982	1	1	0.99996261896519	0.111018212001018	1.47075655692565e-34	1.35526507750039e-35	3.7381034810197e-05
497	T71F	Collaterally Sensitive	Collaterally Sensitive	Collaterally Sensitive	Collaterally Sensitive	0.999999998090553	1	0.999999999999987	0.99999999997515	1.90944715764625e-09	7.74136913574702e-137	1.28079059425348e-14	2.48503863807197e-11
498	T71K	Collaterally Sensitive	Collaterally Sensitive	Collaterally Sensitive	Collaterally Sensitive	1	0.999999999330997	0.999999999901539	0.99999999996991	0	6.69003198435005e-10	9.84610174561188e-11	3.0090045390611e-11
499	T71N	Collaterally Sensitive	Collaterally Sensitive	Collaterally Sensitive	Collaterally Sensitive	0.997349426127081	0.999999999856806	1	1	0.00265057387291902	1.43194461208049e-10	2.18761112958309e-199	3.57811293521759e-31
500	T71R	Collaterally Sensitive	Collaterally Sensitive	Collaterally Sensitive	Collaterally Sensitive	1	1	1	1	4.08107122217882e-288	7.32961065880374e-96	2.39658312535444e-113	0
501	T71S	Collaterally Resistant	Collaterally Neutral	Collaterally Neutral	Collaterally Sensitive	0.00870067545847963	0.148141921433589	0.664501319808664	0.999913062116392	0.99129932454152	0.851858078566411	0.335498680191336	8.69378836080561e-05
502	T71W	Collaterally Sensitive	Collaterally Sensitive	Collaterally Sensitive	Collaterally Sensitive	1	0.999983249285218	1	1	1.42642115248197e-80	1.67507147822512e-05	3.93069024513587e-116	9.04439370163559e-33
503	F72C	Collaterally Neutral	Collaterally Sensitive	Collaterally Resistant	Collaterally Sensitive	0.304635121661949	0.999999998603749	2.92685800706849e-07	0.999808085315783	0.695364878338051	1.39625141798173e-09	0.999999707314199	0.000191914684217094
504	F72G	Collaterally Resistant	Collaterally Resistant	Collaterally Resistant	Collaterally Sensitive	0	0.00332200501527069	8.59726305590947e-07	0.99999973772517	1	0.996677994984729	0.999999140273694	2.62274830304564e-07
505	F72I	Collaterally Resistant	Collaterally Resistant	Collaterally Resistant	Collaterally Sensitive	5.22915044598449e-14	0	8.90581244306077e-07	1	0.999999999999948	1	0.999999109418756	6.01153184241866e-167
506	F72K	Collaterally Neutral	Collaterally Sensitive	Collaterally Sensitive	Collaterally Sensitive	0.334922382373824	1	1	0.999736893899594	0.665077617626176	1.29394354281387e-21	0	0.000263106100405547
507	F72L	Collaterally Neutral	Collaterally Resistant	Collaterally Neutral	Collaterally Sensitive	0.257517653283604	0.000505401790062088	0.820939277884565	0.999964642456138	0.742482346716396	0.999494598209938	0.179060722115435	3.53575438619144e-05
508	F72M	Collaterally Neutral	Collaterally Neutral	Collaterally Neutral	Collaterally Neutral	0.41635747054014	0.452992310181632	0.548194515436153	0.429016558810899	0.58364252945986	0.547007689818368	0.451805484563847	0.570983441189101
509	F72N	Collaterally Resistant	Collaterally Neutral	Collaterally Neutral	Collaterally Sensitive	0.00552586558719759	0.68196437025508	0.790987937036881	1	0.994474134412802	0.31803562974492	0.209012062963119	4.22066408596054e-20
510	F72P	Collaterally Sensitive	Collaterally Sensitive	Collaterally Sensitive	Collaterally Sensitive	1	1	1	0.999798779659168	1.08054367111804e-298	3.0275328611714e-75	5.08739088157567e-63	0.000201220340831738
511	F72Q	Collaterally Neutral	Collaterally Resistant	Collaterally Sensitive	Collaterally Sensitive	0.346414200059507	1.64535052249448e-13	0.909263406195509	0.997641211339088	0.653585799940493	0.999999999999835	0.090736593804491	0.00235878866091196
512	F72R	Collaterally Sensitive	Collaterally Sensitive	Collaterally Sensitive	Collaterally Sensitive	0.997280385784151	1	1	1	0.00271961421584878	7.14453395172977e-17	0	0
513	F72T	Collaterally Neutral	Collaterally Neutral	Collaterally Neutral	Collaterally Sensitive	0.266603438722135	0.424224309221836	0.194654244738818	0.999999999999856	0.733396561277865	0.575775690778164	0.805345755261182	1.44471992310942e-13
514	F72V	Collaterally Resistant	Collaterally Resistant	Collaterally Resistant	Collaterally Neutral	0	6.46151867663702e-05	9.57012247226885e-14	0.859310524785695	1	0.999935384813234	0.999999999999904	0.140689475214305
515	K73C	Collaterally Sensitive	Collaterally Sensitive	Collaterally Sensitive	Collaterally Sensitive	1	0.999999992606594	0.99999999999782	0.99999999997492	3.03542804710932e-27	7.39340601824928e-09	2.17995857152377e-12	2.50804262846782e-11
516	K73P	Collaterally Sensitive	Collaterally Sensitive	Collaterally Sensitive	Collaterally Sensitive	1	1	1	1	0	1.68085528989682e-50	1.01526250877203e-40	5.66262021808083e-39
517	V74A	Collaterally Neutral	Collaterally Neutral	Collaterally Sensitive	Collaterally Sensitive	0.810753211982293	0.548348195452822	0.99800204287738	0.975959903590561	0.189246788017707	0.451651804547178	0.00199795712261987	0.0240400964094392
518	V74C	Collaterally Neutral	Collaterally Resistant	Collaterally Sensitive	Collaterally Sensitive	0.318758977287201	0.0426610402834841	1	1	0.681241022712799	0.957338959716516	3.04780129280873e-50	2.69524884821767e-129
519	V74D	Collaterally Sensitive	Collaterally Sensitive	Collaterally Sensitive	Collaterally Sensitive	1	1	1	1	1.63189615643788e-38	2.36388192568635e-180	1.86488068274382e-25	0
520	V74E	Collaterally Neutral	Collaterally Sensitive	Collaterally Sensitive	Collaterally Sensitive	0.824549663926858	0.997555971884832	0.996931478093157	0.998330750726345	0.175450336073142	0.00244402811516798	0.00306852190684341	0.00166924927365541
521	V74F	Collaterally Neutral	Collaterally Sensitive	Collaterally Sensitive	Collaterally Sensitive	0.877115080439549	0.999221329923032	1	1	0.122884919560451	0.00077867007696828	3.3626801878068e-250	1.14807084187503e-24
522	V74G	Collaterally Neutral	Collaterally Sensitive	Collaterally Sensitive	Collaterally Sensitive	0.59150886886974	1	0.999999738183609	1	0.40849113113026	1.91971951448112e-65	2.61816391402685e-07	2.01822459217343e-100
523	V74H	Collaterally Neutral	Collaterally Sensitive	Collaterally Sensitive	Collaterally Sensitive	0.422603277807943	0.987001505077424	1	1	0.577396722192057	0.0129984949225758	0	1.09941214701969e-166
524	V74I	Collaterally Neutral	Collaterally Sensitive	Collaterally Neutral	Collaterally Sensitive	0.579007108990079	1	0.347029707938104	0.985374120692795	0.420992891009921	1.18111778321786e-21	0.652970292061896	0.0146258793072047
525	V74K	Collaterally Sensitive	Collaterally Sensitive	Collaterally Sensitive	Collaterally Sensitive	0.967543572882488	0.963989209372158	0.965943100301073	0.97780491787131	0.0324564271175124	0.0360107906278421	0.034056899698927	0.0221950821286905
526	V74L	Collaterally Neutral	Collaterally Resistant	Collaterally Sensitive	Collaterally Sensitive	0.261854324953241	0.0378353747311445	0.959833340611368	0.999978229670582	0.738145675046759	0.962164625268855	0.0401666593886319	2.17703294184592e-05
527	V74M	Collaterally Neutral	Collaterally Neutral	Collaterally Sensitive	Collaterally Sensitive	0.802279645045076	0.162808094199786	0.996059103009457	0.999998982084827	0.197720354954924	0.837191905800214	0.00394089699054321	1.01791517308695e-06
528	V74Q	Collaterally Sensitive	Collaterally Sensitive	Collaterally Sensitive	Collaterally Sensitive	0.984185194525071	0.999236493712118	0.999941577756422	0.999999999974114	0.0158148054749289	0.000763506287881528	5.8422243577753e-05	2.58860946614588e-11
529	V74R	Collaterally Sensitive	Collaterally Sensitive	Collaterally Sensitive	Collaterally Sensitive	1	1	0.99999991234282	1	8.05652010841057e-72	3.35582021524009e-170	8.76571799734997e-08	4.56839184531444e-33
530	V74S	Collaterally Neutral	Collaterally Neutral	Collaterally Neutral	Collaterally Sensitive	0.578191827518726	0.544844337423623	0.761503193053518	1	0.421808172481274	0.455155662576377	0.238496806946482	1.64564476924598e-36
531	V74W	Collaterally Sensitive	Collaterally Sensitive	Collaterally Sensitive	Collaterally Sensitive	0.999999995674749	0.999497045931471	0.999229403345062	0.99956114362009	4.32525118286152e-09	0.000502954068529155	0.000770596654937499	0.000438856379909787
532	V74Y	Collaterally Sensitive	Collaterally Sensitive	Collaterally Sensitive	Collaterally Sensitive	0.978658918474671	1	1	0.999999686062997	0.0213410815253294	0	0	3.1393700316967e-07
533	L75C	Collaterally Neutral	Collaterally Neutral	Collaterally Neutral	Collaterally Sensitive	0.458382856658799	0.129454123002601	0.137720350813781	0.998236187242377	0.541617143341201	0.870545876997399	0.862279649186219	0.00176381275762267
534	L75D	Collaterally Sensitive	Collaterally Sensitive	Collaterally Sensitive	Collaterally Sensitive	0.999999999999964	0.955850303291897	0.99542457507407	0.999999999868561	3.59892532627873e-14	0.0441496967081031	0.00457542492593012	1.31439127277641e-10
535	L75E	Collaterally Neutral	Collaterally Sensitive	Collaterally Sensitive	Collaterally Sensitive	0.630582517891898	0.91931569730631	0.999923398056793	0.999822045710146	0.369417482108102	0.0806843026936898	7.66019432069934e-05	0.000177954289854026
536	L75F	Collaterally Sensitive	Collaterally Neutral	Collaterally Neutral	Collaterally Sensitive	0.999987748098511	0.422120435420232	0.853811087410554	0.993455503406978	1.22519014888253e-05	0.577879564579768	0.146188912589446	0.00654449659302238
537	L75G	Collaterally Neutral	Collaterally Neutral	Collaterally Resistant	Collaterally Sensitive	0.459309045261874	0.353325442508273	0.0474903536361967	1	0.540690954738126	0.646674557491727	0.952509646363803	2.64808773409277e-26
538	L75H	Collaterally Sensitive	Collaterally Neutral	Collaterally Neutral	Collaterally Sensitive	0.886035731638601	0.75311328539196	0.296456903737325	1	0.113964268361399	0.24688671460804	0.703543096262675	7.56988288467746e-33
539	L75K	Collaterally Sensitive	Collaterally Sensitive	Collaterally Sensitive	Collaterally Sensitive	0.999999902185846	1	1	1	9.78141537442455e-08	1.63565375170045e-22	5.0351106638019e-49	9.32253253791299e-263
540	L75M	Collaterally Neutral	Collaterally Neutral	Collaterally Neutral	Collaterally Sensitive	0.277013762386304	0.427443611066035	0.211886642064415	1	0.722986237613696	0.572556388933965	0.788113357935585	5.18196583337689e-62
541	L75N	Collaterally Resistant	Collaterally Sensitive	Collaterally Sensitive	Collaterally Sensitive	0.088938931052148	0.971990155062238	0.961970901063077	0.999999999797364	0.911061068947852	0.0280098449377618	0.0380290989369233	2.02636083544621e-10
542	L75P	Collaterally Neutral	Collaterally Sensitive	Collaterally Resistant	Collaterally Sensitive	0.681567821801328	0.929989630437183	0.0795778926386526	0.989774419227091	0.318432178198672	0.0700103695628171	0.920422107361347	0.0102255807729092
543	L75Q	Collaterally Neutral	Collaterally Resistant	Collaterally Neutral	Collaterally Sensitive	0.176652652077379	0.000299540012192456	0.876880431541496	1	0.823347347922621	0.999700459987808	0.123119568458504	0
544	L75R	Collaterally Sensitive	Collaterally Sensitive	Collaterally Sensitive	Collaterally Sensitive	1	0.999999999999986	1	0.999966446394598	1.21696290605905e-154	1.42895978826352e-14	2.42033672949557e-30	3.35536054017911e-05
545	L75S	Collaterally Resistant	Collaterally Resistant	Collaterally Resistant	Collaterally Sensitive	0	1.14130926931466e-13	0.00564404385332351	0.999695786699406	1	0.999999999999886	0.994355956146676	0.000304213300594357
546	L75T	Collaterally Neutral	Collaterally Sensitive	Collaterally Neutral	Collaterally Sensitive	0.675311079640663	0.999934537886983	0.529514663755291	0.999369521376561	0.324688920359337	6.54621130171282e-05	0.470485336244709	0.000630478623439334
547	L75V	Collaterally Neutral	Collaterally Neutral	Collaterally Neutral	Collaterally Neutral	0.669288439460697	0.379484636103598	0.359149922147635	0.786191615852679	0.330711560539303	0.620515363896402	0.640850077852365	0.213808384147321
548	L75W	Collaterally Sensitive	Collaterally Sensitive	Collaterally Sensitive	Collaterally Sensitive	0.999308359267627	0.99999986634339	0.999015321217555	1	0.00069164073237354	1.33656610307026e-07	0.00098467878244513	0
549	L75Y	Collaterally Neutral	Collaterally Neutral	Collaterally Resistant	Collaterally Sensitive	0.589888748556721	0.862404183700379	0.0386525765286563	0.999991022880239	0.410111251443279	0.137595816299621	0.961347423471344	8.97711976061081e-06
550	L76A	Collaterally Neutral	Collaterally Neutral	Collaterally Neutral	Collaterally Sensitive	0.287495147165972	0.494165885715903	0.398044894357478	0.999977637492307	0.712504852834028	0.505834114284097	0.601955105642522	2.23625076928517e-05
551	L76C	Collaterally Neutral	Collaterally Resistant	Collaterally Sensitive	Collaterally Sensitive	0.490161595157573	0.00016180697855539	0.913051468449421	0.999513672641937	0.509838404842427	0.999838193021445	0.0869485315505787	0.000486327358062878
552	L76D	Collaterally Sensitive	Collaterally Sensitive	Collaterally Sensitive	Collaterally Sensitive	1	0.999999976324101	0.999999954809573	1	1.49674220665365e-54	2.36758990193069e-08	4.51904266584004e-08	2.15111819731552e-31
553	L76E	Collaterally Sensitive	Collaterally Neutral	Collaterally Sensitive	Collaterally Sensitive	0.966213015542174	0.678862872954858	0.992081242583735	1	0.0337869844578263	0.321137127045142	0.00791875741626485	0
554	L76F	Collaterally Sensitive	Collaterally Sensitive	Collaterally Sensitive	Collaterally Sensitive	0.999999999999952	0.999999999996477	0.999938727660657	1	4.83669961072869e-14	3.5233896823223e-12	6.12723393434933e-05	3.73383756339978e-92
555	L76G	Collaterally Neutral	Collaterally Sensitive	Collaterally Sensitive	Collaterally Sensitive	0.305912126986132	0.99044045890588	1	1	0.694087873013868	0.00955954109411996	1.67960018280835e-23	0
556	L76H	Collaterally Sensitive	Collaterally Sensitive	Collaterally Sensitive	Collaterally Sensitive	1	1	1	0.999999999015665	3.6986232757598e-33	4.6569628966794e-44	0	9.84335302216871e-10
557	L76I	Collaterally Resistant	Collaterally Neutral	Collaterally Neutral	Collaterally Sensitive	3.75191706925015e-07	0.18929475818572	0.310013503876956	0.963122468300892	0.999999624808293	0.81070524181428	0.689986496123044	0.0368775316991082
558	L76K	Collaterally Sensitive	Collaterally Sensitive	Collaterally Sensitive	Collaterally Sensitive	1	1	0.999999471575377	0.99999999608643	4.10146349090613e-56	1.98174333841614e-27	5.28424622773091e-07	3.91357011031128e-09
559	L76M	Collaterally Neutral	Collaterally Neutral	Collaterally Resistant	Collaterally Sensitive	0.366780785640363	0.196071170690013	0.119193077121008	0.986277541667083	0.633219214359637	0.803928829309987	0.880806922878992	0.0137224583329168
560	L76N	Collaterally Sensitive	Collaterally Sensitive	Collaterally Sensitive	Collaterally Sensitive	0.951933172030126	0.99999964936287	0.999769187639798	0.999999999476677	0.0480668279698736	3.50637130333826e-07	0.000230812360202192	5.23322832091156e-10
561	L76P	Collaterally Sensitive	Collaterally Sensitive	Collaterally Sensitive	Collaterally Sensitive	0.999699529286045	1	1	1	0.000300470713955375	3.91646484136348e-45	1.95877614991854e-60	2.96292606848228e-40
562	L76Q	Collaterally Sensitive	Collaterally Sensitive	Collaterally Sensitive	Collaterally Sensitive	1	0.984677911676254	0.983157785081808	0.999999999928316	0	0.015322088323746	0.0168422149181918	7.16839933102247e-11
563	L76R	Collaterally Sensitive	Collaterally Sensitive	Collaterally Sensitive	Collaterally Sensitive	1	1	0.999999999997408	1	2.97788596433545e-62	1.61473328306837e-77	2.59241145345229e-12	1.30374593691075e-24
564	L76S	Collaterally Neutral	Collaterally Sensitive	Collaterally Sensitive	Collaterally Sensitive	0.306409556906584	0.999876194479984	1	0.999999999932838	0.693590443093416	0.000123805520015656	4.49089584398837e-36	6.71620779449957e-11
565	L76T	Collaterally Neutral	Collaterally Neutral	Collaterally Resistant	Collaterally Sensitive	0.624404448708357	0.183370048727111	0.00124627954112222	1	0.375595551291643	0.816629951272889	0.998753720458878	0
566	L76W	Collaterally Sensitive	Collaterally Sensitive	Collaterally Sensitive	Collaterally Sensitive	1	0.999968506080535	0.999999920292406	0.999976167545604	2.94743287068052e-53	3.14939194652781e-05	7.97075941386953e-08	2.38324543962125e-05
567	L76Y	Collaterally Sensitive	Collaterally Sensitive	Collaterally Sensitive	Collaterally Sensitive	0.999981254938626	1	0.999943718511915	1	1.87450613740681e-05	1.0079098938417e-83	5.62814880853913e-05	0
568	C77A	Collaterally Neutral	Collaterally Neutral	Collaterally Neutral	Collaterally Sensitive	0.284547682487672	0.464218734330257	0.448314732893757	0.999504528069045	0.715452317512328	0.535781265669743	0.551685267106243	0.000495471930955492
569	C77D	Collaterally Sensitive	Collaterally Sensitive	Collaterally Sensitive	Collaterally Sensitive	0.999529695005052	1	0.99999999992661	0.999248752245493	0.000470304994947969	8.93420452266166e-36	7.3390124460068e-11	0.000751247754506632
570	C77E	Collaterally Sensitive	Collaterally Sensitive	Collaterally Sensitive	Collaterally Sensitive	1	0.99999999999997	0.999903871987008	0.991193691699281	3.9134087664423e-101	2.969511062756e-14	9.61280129923036e-05	0.00880630830071901
571	C77F	Collaterally Sensitive	Collaterally Sensitive	Collaterally Sensitive	Collaterally Sensitive	1	1	0.999999891188845	0.999999999366134	5.02660532349801e-98	0	1.08811154561475e-07	6.33865575508507e-10
572	C77G	Collaterally Neutral	Collaterally Neutral	Collaterally Neutral	Collaterally Sensitive	0.269416673422713	0.732201984238411	0.624756566760558	0.968975517092095	0.730583326577287	0.267798015761589	0.375243433239442	0.0310244829079054
573	C77H	Collaterally Sensitive	Collaterally Sensitive	Collaterally Sensitive	Collaterally Sensitive	1	1	1	1	8.36377198912229e-17	7.71625417975419e-106	0	1.66600707891068e-77
574	C77K	Collaterally Sensitive	Collaterally Sensitive	Collaterally Sensitive	Collaterally Sensitive	1	1	0.999971839373855	0.999999868961222	1.23540330616728e-43	4.98074732581311e-109	2.81606261451818e-05	1.31038778536919e-07
575	C77L	Collaterally Neutral	Collaterally Neutral	Collaterally Sensitive	Collaterally Sensitive	0.161742214556871	0.325066189376906	0.960169004346981	1	0.838257785443129	0.674933810623094	0.0398309956530185	0
576	C77M	Collaterally Neutral	Collaterally Sensitive	Collaterally Neutral	Collaterally Sensitive	0.186416717056456	0.999998372683024	0.833325456037123	1	0.813583282943544	1.6273169757597e-06	0.166674543962877	1.67749517820083e-22
577	C77N	Collaterally Neutral	Collaterally Sensitive	Collaterally Sensitive	Collaterally Sensitive	0.710579639677974	1	0.999999993280842	1	0.289420360322026	1.22383097497471e-92	6.7191577134471e-09	3.28211018958149e-16
578	C77P	Collaterally Sensitive	Collaterally Sensitive	Collaterally Sensitive	Collaterally Sensitive	1	1	1	1	1.54517240006975e-72	2.53261564437279e-32	9.42990178302921e-187	1.40689315582589e-25
579	C77Q	Collaterally Sensitive	Collaterally Sensitive	Collaterally Sensitive	Collaterally Sensitive	1	1	0.999559722260592	0.999987198740821	3.84933110602042e-40	7.6083177817696e-31	0.000440277739407558	1.28012591791766e-05
580	C77R	Collaterally Sensitive	Collaterally Sensitive	Collaterally Sensitive	Collaterally Sensitive	0.999999999999988	0.999999999933358	1	1	1.23613516277324e-14	6.66419811934911e-11	1.29771887042162e-22	0
581	C77S	Collaterally Neutral	Collaterally Neutral	Collaterally Neutral	Collaterally Sensitive	0.333788299839083	0.617137541954724	0.599856510363399	1	0.666211700160917	0.382862458045276	0.400143489636601	1.22069923210961e-258
582	C77T	Collaterally Neutral	Collaterally Sensitive	Collaterally Neutral	Collaterally Sensitive	0.131057034641863	0.999999999623454	0.426835012404013	0.994928770813141	0.868942965358137	3.76545729512842e-10	0.573164987595987	0.00507122918685916
583	C77V	Collaterally Neutral	Collaterally Neutral	Collaterally Resistant	Collaterally Sensitive	0.312273533670712	0.518177933668261	0.0996584176144143	0.99999998879896	0.687726466329288	0.481822066331739	0.900341582385586	1.12010396807105e-08
584	C77W	Collaterally Sensitive	Collaterally Sensitive	Collaterally Sensitive	Collaterally Sensitive	1	0.999999999999999	0.999999999999999	1	5.85334923769225e-53	1.13536051738147e-15	9.45244267620342e-16	4.00585623771897e-207
585	C77Y	Collaterally Sensitive	Collaterally Sensitive	Collaterally Sensitive	Collaterally Sensitive	1	1	0.999986283516558	0.997478730808215	5.17571582901046e-46	2.69295966367466e-43	1.37164834421174e-05	0.00252126919178539
586	G78A	Collaterally Neutral	Collaterally Neutral	Collaterally Neutral	Collaterally Sensitive	0.515766816747326	0.774859867763977	0.49504372867231	0.979979330344164	0.484233183252674	0.225140132236023	0.50495627132769	0.0200206696558357
587	G78C	Collaterally Neutral	Collaterally Neutral	Collaterally Neutral	Collaterally Sensitive	0.390457802418777	0.869751821930406	0.613763359542775	0.99988518316654	0.609542197581223	0.130248178069594	0.386236640457225	0.000114816833460218
588	G78F	Collaterally Neutral	Collaterally Sensitive	Collaterally Sensitive	Collaterally Sensitive	0.568428452329002	0.991983403146313	0.98684719017235	1	0.431571547670998	0.0080165968536867	0.0131528098276497	3.75475413516517e-81
589	G78H	Collaterally Neutral	Collaterally Sensitive	Collaterally Sensitive	Collaterally Sensitive	0.864120007292527	1	1	0.999999659552384	0.135879992707473	6.99562977578895e-20	1.0218013271258e-62	3.4044761562883e-07
590	G78K	Collaterally Sensitive	Collaterally Sensitive	Collaterally Sensitive	Collaterally Sensitive	1	1	0.999999996713779	0.999999999999917	3.99360372537186e-27	1.08343711113266e-18	3.28622074204403e-09	8.31447840116143e-14
591	G78L	Collaterally Sensitive	Collaterally Sensitive	Collaterally Sensitive	Collaterally Sensitive	0.877810642880137	0.999912909774242	0.999050200867478	1	0.122189357119863	8.70902257579395e-05	0.000949799132521932	0
592	G78M	Collaterally Sensitive	Collaterally Sensitive	Collaterally Neutral	Collaterally Sensitive	1	0.999939233348212	0.689870964841423	0.999999999988212	0	6.0766651787687e-05	0.310129035158577	1.17881111845026e-11
593	G78N	Collaterally Sensitive	Collaterally Sensitive	Collaterally Sensitive	Collaterally Sensitive	0.998630444121175	1	0.999999998072134	0.999999492192073	0.00136955587882535	2.05768710822673e-19	1.92786590928941e-09	5.07807927039657e-07
594	G78P	Collaterally Sensitive	Collaterally Sensitive	Collaterally Sensitive	Collaterally Sensitive	1	1	1	0.999999999997522	1.48641967400761e-119	6.70275187141556e-91	0	2.47825999793923e-12
595	G78Q	Collaterally Sensitive	Collaterally Sensitive	Collaterally Sensitive	Collaterally Sensitive	0.987676864148122	1	1	0.99999999999883	0.0123231358518777	1.00377879250639e-16	2.03668516109678e-35	1.16992192921852e-12
596	G78R	Collaterally Sensitive	Collaterally Sensitive	Collaterally Sensitive	Collaterally Sensitive	0.999999999844567	1	1	1	1.55433213185878e-10	2.61053471630432e-68	4.70619606724028e-68	5.41666854925038e-53
597	G78S	Collaterally Neutral	Collaterally Sensitive	Collaterally Neutral	Collaterally Sensitive	0.291486057920399	0.999511706237145	0.454412623457423	0.911418460736968	0.708513942079601	0.000488293762854934	0.545587376542577	0.0885815392630325
598	G78T	Collaterally Neutral	Collaterally Sensitive	Collaterally Neutral	Collaterally Sensitive	0.557951661106964	0.941392152239463	0.194704999214159	0.999999999268107	0.442048338893036	0.0586078477605367	0.805295000785841	7.31892886061509e-10
599	G78V	Collaterally Resistant	Collaterally Sensitive	Collaterally Sensitive	Collaterally Sensitive	0.0294803234173875	1	0.985034203398691	0.999999999999998	0.970519676582613	9.13049029180161e-22	0.0149657966013091	1.63446463937468e-15
600	G78W	Collaterally Neutral	Collaterally Neutral	Collaterally Sensitive	Collaterally Sensitive	0.305829422491855	0.765793376899328	0.94668636069309	1	0.694170577508145	0.234206623100672	0.0533136393069102	0
601	A79C	Collaterally Neutral	Collaterally Neutral	Collaterally Neutral	Collaterally Neutral	0.188222629884552	0.479048698430119	0.540028268262598	0.257309871115372	0.811777370115448	0.520951301569881	0.459971731737402	0.742690128884628
602	A79D	Collaterally Neutral	Collaterally Neutral	Collaterally Neutral	Collaterally Sensitive	0.867129215087863	0.333403494198005	0.419446988965188	0.9785416079782	0.132870784912137	0.666596505801995	0.580553011034812	0.0214583920217996
603	A79E	Collaterally Neutral	Collaterally Neutral	Collaterally Neutral	Collaterally Sensitive	0.428121708313867	0.251485499287041	0.620382900693398	0.999766610134245	0.571878291686133	0.748514500712959	0.379617099306602	0.000233389865754737
604	A79G	Collaterally Sensitive	Collaterally Neutral	Collaterally Neutral	Collaterally Sensitive	0.896358851454812	0.488634463264681	0.522394197907276	0.999033912821747	0.103641148545188	0.511365536735319	0.477605802092724	0.000966087178253145
605	A79I	Collaterally Neutral	Collaterally Neutral	Collaterally Neutral	Collaterally Sensitive	0.556402707740099	0.811144427650517	0.166507189001145	0.977242592115031	0.443597292259901	0.188855572349483	0.833492810998855	0.0227574078849686
606	A79K	Collaterally Neutral	Collaterally Neutral	Collaterally Neutral	Collaterally Sensitive	0.819589395152022	0.51204841306504	0.533978088182179	0.999999777103683	0.180410604847978	0.48795158693496	0.466021911817821	2.2289631731009e-07
607	A79P	Collaterally Sensitive	Collaterally Sensitive	Collaterally Sensitive	Collaterally Sensitive	0.952410384076283	1	1	0.999999892301757	0.0475896159237173	1.45702393591088e-203	1.19049061676454e-16	1.07698243357508e-07
608	A79R	Collaterally Sensitive	Collaterally Neutral	Collaterally Neutral	Collaterally Sensitive	0.977436598852122	0.527742762784782	0.577489709071461	0.999663647113887	0.0225634011478779	0.472257237215218	0.422510290928539	0.00033635288611292
609	A79S	Collaterally Neutral	Collaterally Neutral	Collaterally Neutral	Collaterally Sensitive	0.303935342637911	0.306284642021154	0.230847281877108	0.987218646337096	0.696064657362089	0.693715357978846	0.769152718122892	0.0127813536629039
610	A79T	Collaterally Neutral	Collaterally Neutral	Collaterally Neutral	Collaterally Sensitive	0.563691499231166	0.498411643429971	0.797763740539791	0.998159825694495	0.436308500768834	0.501588356570029	0.202236259460209	0.00184017430550533
611	A79W	Collaterally Neutral	Collaterally Neutral	Collaterally Neutral	Collaterally Sensitive	0.622434186124718	0.470448961891143	0.657818312824572	1	0.377565813875282	0.529551038108857	0.342181687175428	2.96627989381416e-55
612	V80A	Collaterally Resistant	Collaterally Sensitive	Collaterally Neutral	Collaterally Sensitive	0.000714769344288269	0.983350513493081	0.841752197433978	0.999999894832368	0.999285230655712	0.0166494865069191	0.158247802566022	1.05167631906365e-07
613	V80C	Collaterally Neutral	Collaterally Neutral	Collaterally Sensitive	Collaterally Sensitive	0.295547507971657	0.132733811483079	0.91117215684608	1	0.704452492028343	0.867266188516921	0.0888278431539202	2.63947707204459e-16
614	V80D	Collaterally Sensitive	Collaterally Sensitive	Collaterally Sensitive	Collaterally Sensitive	0.927284582330465	0.999221748309081	0.999999999999981	0.999999999988828	0.0727154176695346	0.000778251690919354	1.94760357296138e-14	1.11721859315833e-11
615	V80E	Collaterally Resistant	Collaterally Sensitive	Collaterally Sensitive	Collaterally Sensitive	0	0.945987930849971	1	1	1	0.0540120691500286	6.22867364658485e-75	6.24818617720253e-91
616	V80F	Collaterally Neutral	Collaterally Sensitive	Collaterally Sensitive	Collaterally Sensitive	0.671866207235357	0.988151194747259	0.938455732222417	0.999999999612871	0.328133792764643	0.0118488052527413	0.0615442677775835	3.87128639971307e-10
617	V80G	Collaterally Neutral	Collaterally Sensitive	Collaterally Sensitive	Collaterally Sensitive	0.716755277269624	1	1	1	0.283244722730376	1.50818967359753e-23	0	0
618	V80H	Collaterally Neutral	Collaterally Neutral	Collaterally Sensitive	Collaterally Sensitive	0.473262190767316	0.385564519310557	0.999917920862104	0.999999558463488	0.526737809232684	0.614435480689443	8.20791378964322e-05	4.41536512492411e-07
619	V80K	Collaterally Neutral	Collaterally Sensitive	Collaterally Sensitive	Collaterally Sensitive	0.648556493489274	1	1	0.999999999194531	0.351443506510726	1.9683791799781e-305	5.49292221966086e-128	8.05468668031268e-10
620	V80N	Collaterally Resistant	Collaterally Sensitive	Collaterally Sensitive	Collaterally Sensitive	0.00168486292789283	1	0.997152643852766	0.999999999999891	0.998315137072107	3.39002173513676e-22	0.00284735614723387	1.08742795305267e-13
621	V80P	Collaterally Sensitive	Collaterally Sensitive	Collaterally Sensitive	Collaterally Sensitive	1	1	0.999999865208793	1	3.35195940943558e-159	1.99875909021163e-87	1.34791206752887e-07	3.74494018461458e-25
622	V80Q	Collaterally Resistant	Collaterally Sensitive	Collaterally Sensitive	Collaterally Sensitive	0.0963546468646514	1	1	0.999998924441591	0.903645353135349	4.64987498817278e-153	5.73149801754235e-18	1.07555840902945e-06
623	V80R	Collaterally Sensitive	Collaterally Sensitive	Collaterally Sensitive	Collaterally Sensitive	0.999999999770837	1	0.999841078745026	0.999847233209369	2.2916278824091e-10	2.06566955103132e-97	0.00015892125497418	0.000152766790631407
624	V80S	Collaterally Neutral	Collaterally Neutral	Collaterally Sensitive	Collaterally Sensitive	0.752130128246695	0.861095146055119	1	1	0.247869871753305	0.138904853944881	3.81655979871697e-18	2.14788473650175e-23
625	V80T	Collaterally Neutral	Collaterally Neutral	Collaterally Neutral	Collaterally Sensitive	0.54882387915265	0.842084363405669	0.64183674790996	0.995579770963462	0.45117612084735	0.157915636594331	0.35816325209004	0.00442022903653809
626	V80W	Collaterally Neutral	Collaterally Sensitive	Collaterally Sensitive	Collaterally Sensitive	0.744921015776044	1	1	1	0.255078984223956	0	2.67330555081858e-44	0
627	L81A	Collaterally Resistant	Collaterally Neutral	Collaterally Sensitive	Collaterally Sensitive	0.00403864141774846	0.736727541934441	0.999997058612514	1	0.995961358582252	0.263272458065559	2.94138748644174e-06	2.7626680196448e-137
628	L81C	Collaterally Resistant	Collaterally Neutral	Collaterally Sensitive	Collaterally Sensitive	2.03247120478256e-06	0.167779770156606	0.999123012847985	1	0.999997967528795	0.832220229843394	0.00087698715201481	2.31315217375105e-24
629	L81D	Collaterally Sensitive	Collaterally Sensitive	Collaterally Sensitive	Collaterally Sensitive	1	1	1	0.999976760678757	5.31461404798629e-277	0	1.95779865154392e-18	2.32393212427594e-05
630	L81E	Collaterally Neutral	Collaterally Sensitive	Collaterally Sensitive	Collaterally Sensitive	0.476474907708288	1	1	0.999999999999896	0.523525092291712	2.54375421852764e-27	1.54995426875622e-28	1.0377652555594e-13
631	L81F	Collaterally Resistant	Collaterally Sensitive	Collaterally Sensitive	Collaterally Sensitive	1.96533924134989e-07	0.91652167671892	0.998424005924317	1	0.999999803466076	0.0834783232810795	0.00157599407568284	1.76631075814517e-18
632	L81G	Collaterally Neutral	Collaterally Sensitive	Collaterally Sensitive	Collaterally Sensitive	0.763101366043301	1	0.999999949470772	0.999999994400685	0.236898633956699	4.64994709167909e-59	5.05292281977789e-08	5.59931501044946e-09
633	L81H	Collaterally Neutral	Collaterally Sensitive	Collaterally Sensitive	Collaterally Sensitive	0.748915257911622	0.999998672618948	0.998777615404002	1	0.251084742088378	1.32738105175966e-06	0.00122238459599787	1.03066808328096e-20
634	L81I	Collaterally Neutral	Collaterally Neutral	Collaterally Sensitive	Collaterally Sensitive	0.452064497720384	0.6991952394046	0.912321036253089	1	0.547935502279616	0.3008047605954	0.0876789637469105	8.45741884350566e-18
635	L81K	Collaterally Sensitive	Collaterally Sensitive	Collaterally Sensitive	Collaterally Sensitive	1	1	0.999999148735002	0.999999999991571	5.34738265563684e-89	1.53862887448478e-21	8.51264997717423e-07	8.42866076840078e-12
636	L81M	Collaterally Neutral	Collaterally Neutral	Collaterally Neutral	Collaterally Sensitive	0.502305031001519	0.408991438217196	0.172202504410692	0.910222460465822	0.497694968998481	0.591008561782804	0.827797495589308	0.0897775395341784
637	L81N	Collaterally Resistant	Collaterally Sensitive	Collaterally Sensitive	Collaterally Sensitive	0.104121798871454	1	0.999999999985051	0.999999999871566	0.895878201128546	1.0411846566218e-93	1.49490882133385e-11	1.28433910388222e-10
638	L81P	Collaterally Sensitive	Collaterally Sensitive	Collaterally Sensitive	Collaterally Sensitive	1	1	0.999996311178007	0.999996223669285	4.49360643647396e-84	1.04271791882374e-32	3.68882199335336e-06	3.77633071549342e-06
639	L81Q	Collaterally Neutral	Collaterally Sensitive	Collaterally Sensitive	Collaterally Sensitive	0.571941949506893	0.952057195784277	1	1	0.428058050493107	0.0479428042157234	2.88673330699067e-38	3.08081249427411e-62
640	L81R	Collaterally Sensitive	Collaterally Sensitive	Collaterally Sensitive	Collaterally Sensitive	0.99999999982447	1	0.999999937280587	1	1.75530282190095e-10	9.35490573555529e-28	6.27194131141818e-08	1.85825179472372e-18
641	L81S	Collaterally Sensitive	Collaterally Sensitive	Collaterally Sensitive	Collaterally Sensitive	0.982382500948437	0.992150325916706	0.999994183704564	0.999999997794082	0.0176174990515626	0.00784967408329365	5.81629543637118e-06	2.20591790014654e-09
642	L81T	Collaterally Neutral	Collaterally Sensitive	Collaterally Sensitive	Collaterally Sensitive	0.498117522835121	0.999728221659651	0.999952991663959	1	0.501882477164879	0.000271778340349311	4.70083360414536e-05	1.33572971768167e-20
643	L81V	Collaterally Resistant	Collaterally Neutral	Collaterally Neutral	Collaterally Sensitive	0.0212692866603927	0.544510794307385	0.71117605840534	1	0.978730713339607	0.455489205692615	0.28882394159466	2.03017063489631e-20
644	L81W	Collaterally Sensitive	Collaterally Sensitive	Collaterally Sensitive	Collaterally Sensitive	0.99933055741843	1	1	1	0.000669442581569649	0	6.60570839234684e-67	0
645	L81Y	Collaterally Neutral	Collaterally Sensitive	Collaterally Sensitive	Collaterally Sensitive	0.39452106964048	0.978657787125823	0.999998320569937	0.999999999996126	0.60547893035952	0.0213422128741767	1.67943006256185e-06	3.87428800899247e-12
646	S82C	Collaterally Neutral	Collaterally Neutral	Collaterally Neutral	Collaterally Sensitive	0.625350318906985	0.142188420133944	0.545359885948676	0.989722691262672	0.374649681093015	0.857811579866056	0.454640114051324	0.0102773087373282
647	S82E	Collaterally Resistant	Collaterally Resistant	Collaterally Neutral	Collaterally Neutral	6.78235245743508e-13	0.0302180592035612	0.389475197305769	0.170899827173625	0.999999999999322	0.969781940796439	0.610524802694231	0.829100172826375
648	S82M	Collaterally Neutral	Collaterally Neutral	Collaterally Neutral	Collaterally Sensitive	0.235482191992497	0.5637356687459	0.442420904205113	0.935335627087694	0.764517808007503	0.4362643312541	0.557579095794887	0.0646643729123065
649	S82Q	Collaterally Neutral	Collaterally Neutral	Collaterally Neutral	Collaterally Neutral	0.138495812455569	0.318183594850294	0.153401791071937	0.315837536631297	0.861504187544431	0.681816405149706	0.846598208928063	0.684162463368703
650	R83A	Collaterally Neutral	Collaterally Sensitive	Collaterally Sensitive	Collaterally Sensitive	0.780643988410436	0.973946153398497	0.879508284244156	1	0.219356011589564	0.0260538466015026	0.120491715755844	0
651	R83C	Collaterally Neutral	Collaterally Neutral	Collaterally Sensitive	Collaterally Sensitive	0.605430084910558	0.834526659404007	0.960394106921866	1	0.394569915089442	0.165473340595993	0.0396058930781342	4.14186712294504e-68
652	R83E	Collaterally Neutral	Collaterally Neutral	Collaterally Neutral	Collaterally Sensitive	0.585682928472917	0.85332856733382	0.628903420671369	1	0.414317071527083	0.14667143266618	0.371096579328631	6.12664914512803e-287
653	R83F	Collaterally Resistant	Collaterally Neutral	Collaterally Neutral	Collaterally Sensitive	0.119304966857432	0.273832252251331	0.494002291257479	0.999953675095857	0.880695033142568	0.726167747748669	0.505997708742521	4.63249041429523e-05
654	R83G	Collaterally Sensitive	Collaterally Sensitive	Collaterally Sensitive	Collaterally Sensitive	0.997768658559199	0.999999999967193	1	1	0.00223134144080119	3.2807238512937e-11	7.83421963312757e-36	1.87058156611561e-16
655	R83H	Collaterally Sensitive	Collaterally Sensitive	Collaterally Sensitive	Collaterally Sensitive	1	0.90072652779936	0.911413200969245	0.952346301191482	2.15113194615999e-20	0.0992734722006401	0.0885867990307549	0.0476536988085185
656	R83I	Collaterally Neutral	Collaterally Sensitive	Collaterally Sensitive	Collaterally Sensitive	0.332446886450128	0.962554286871223	1	0.999950779357698	0.667553113549872	0.0374457131287766	5.56773746454624e-29	4.92206423014806e-05
657	R83M	Collaterally Sensitive	Collaterally Neutral	Collaterally Sensitive	Collaterally Sensitive	0.912015099978057	0.844774288500084	0.999987790893851	0.996104489835818	0.0879849000219427	0.155225711499916	1.22091061488017e-05	0.00389551016418221
658	R83N	Collaterally Sensitive	Collaterally Neutral	Collaterally Sensitive	Collaterally Sensitive	0.879588980060258	0.848631538524294	0.994355497104172	0.999999987941454	0.120411019939742	0.151368461475706	0.00564450289582798	1.20585464563512e-08
659	R83P	Collaterally Sensitive	Collaterally Sensitive	Collaterally Sensitive	Collaterally Sensitive	1	1	1	0.999999999999681	7.84667434730406e-71	0	0	3.1904399719173e-13
660	R83Q	Collaterally Sensitive	Collaterally Neutral	Collaterally Sensitive	Collaterally Sensitive	0.979663445309511	0.874413316304406	0.999996972809645	1	0.0203365546904886	0.125586683695594	3.02719035545473e-06	5.23491901274072e-207
661	R83S	Collaterally Neutral	Collaterally Sensitive	Collaterally Sensitive	Collaterally Sensitive	0.871015500952592	0.999979311668505	0.961802833499348	0.998886798217521	0.128984499047408	2.06883314946226e-05	0.0381971665006519	0.00111320178247927
662	R83T	Collaterally Neutral	Collaterally Neutral	Collaterally Neutral	Collaterally Sensitive	0.713514699439489	0.812986647351555	0.724938409044873	0.999878548691143	0.286485300560511	0.187013352648445	0.275061590955127	0.000121451308856722
663	R83V	Collaterally Sensitive	Collaterally Neutral	Collaterally Sensitive	Collaterally Sensitive	0.923490552955665	0.788326104996907	0.956907000926947	0.999999376157347	0.0765094470443349	0.211673895003093	0.0430929990730528	6.23842652858524e-07
664	R83W	Collaterally Neutral	Collaterally Neutral	Collaterally Neutral	Collaterally Sensitive	0.573375801059221	0.753985184064099	0.441997004229498	1	0.426624198940779	0.246014815935901	0.558002995770502	1.31581995419998e-16
665	V84A	Collaterally Neutral	Collaterally Resistant	Collaterally Resistant	Collaterally Sensitive	0.364350160241547	0	0.0947689595451894	0.999984718225503	0.635649839758453	1	0.905231040454811	1.52817744965813e-05
666	V84C	Collaterally Neutral	Collaterally Neutral	Collaterally Neutral	Collaterally Sensitive	0.561353556835381	0.491004266773515	0.48980811771972	0.93614349766061	0.438646443164619	0.508995733226485	0.51019188228028	0.0638565023393896
667	V84D	Collaterally Sensitive	Collaterally Sensitive	Collaterally Sensitive	Collaterally Sensitive	0.999853565244153	0.999962822158759	0.991844325050588	1	0.000146434755847066	3.71778412413979e-05	0.00815567494941221	1.43306675742715e-21
668	V84E	Collaterally Neutral	Collaterally Neutral	Collaterally Neutral	Collaterally Sensitive	0.136836090499856	0.541486591463437	0.834549290592164	0.999999999923103	0.863163909500144	0.458513408536563	0.165450709407836	7.68971219445617e-11
669	V84F	Collaterally Neutral	Collaterally Neutral	Collaterally Neutral	Collaterally Sensitive	0.756853886971538	0.855766430993541	0.835895949919607	1	0.243146113028462	0.144233569006459	0.164104050080393	1.19827663714626e-18
670	V84G	Collaterally Sensitive	Collaterally Sensitive	Collaterally Sensitive	Collaterally Sensitive	0.990074431027453	0.999751990048252	0.907637554141457	0.99999999995673	0.00992556897254724	0.000248009951748242	0.0923624458585435	4.32697802505932e-11
671	V84H	Collaterally Neutral	Collaterally Neutral	Collaterally Neutral	Collaterally Sensitive	0.773427249869408	0.459666973785343	0.761616004896954	0.985667613387642	0.226572750130592	0.540333026214657	0.238383995103046	0.0143323866123583
672	V84I	Collaterally Neutral	Collaterally Neutral	Collaterally Neutral	Collaterally Sensitive	0.373348934418727	0.544013462348044	0.613925066970666	0.989345505202622	0.626651065581273	0.455986537651956	0.386074933029334	0.0106544947973777
673	V84K	Collaterally Neutral	Collaterally Sensitive	Collaterally Neutral	Collaterally Sensitive	0.20339577067889	0.947704696018204	0.75292031639506	1	0.79660422932111	0.0522953039817962	0.24707968360494	8.8527613166284e-35
674	V84L	Collaterally Neutral	Collaterally Sensitive	Collaterally Sensitive	Collaterally Sensitive	0.303462626622687	0.999903064582717	0.916794938347554	0.999999999998324	0.696537373377313	9.69354172833263e-05	0.083205061652446	1.67590094221705e-12
675	V84M	Collaterally Neutral	Collaterally Neutral	Collaterally Neutral	Collaterally Sensitive	0.564300048095714	0.652101312652941	0.765879951702257	1	0.435699951904286	0.347898687347059	0.234120048297743	0
676	V84N	Collaterally Neutral	Collaterally Sensitive	Collaterally Sensitive	Collaterally Sensitive	0.463194245651323	0.992181985990068	0.96792296785017	0.993011949457345	0.536805754348677	0.00781801400993247	0.0320770321498297	0.00698805054265507
677	V84P	Collaterally Sensitive	Collaterally Sensitive	Collaterally Sensitive	Collaterally Sensitive	0.999454119897088	1	0.999999999999734	0.999999991677247	0.000545880102912066	4.64538830038718e-63	2.65660274965195e-13	8.32275325635907e-09
678	V84Q	Collaterally Neutral	Collaterally Neutral	Collaterally Resistant	Collaterally Sensitive	0.40484239546142	0.321883864886053	0.00218114608652142	1	0.59515760453858	0.678116135113947	0.997818853913479	9.07373663834921e-279
679	V84R	Collaterally Neutral	Collaterally Neutral	Collaterally Neutral	Collaterally Sensitive	0.16200080055816	0.617683910810539	0.725532510840982	1	0.83799919944184	0.382316089189461	0.274467489159018	1.81153433330152e-17
680	V84S	Collaterally Sensitive	Collaterally Sensitive	Collaterally Sensitive	Collaterally Sensitive	0.899010686565339	0.999983938362498	0.999624876446622	0.988395334466718	0.100989313434661	1.60616375018426e-05	0.000375123553377694	0.0116046655332824
681	V84T	Collaterally Neutral	Collaterally Neutral	Collaterally Neutral	Collaterally Sensitive	0.632551092992297	0.633023666681609	0.812115881399118	0.998356287379164	0.367448907007703	0.366976333318391	0.187884118600882	0.00164371262083553
682	V84W	Collaterally Resistant	Collaterally Neutral	Collaterally Neutral	Collaterally Sensitive	0.0306255356686489	0.591542288662544	0.509643693918762	0.999999794246801	0.969374464331351	0.408457711337456	0.490356306081238	2.05753199195526e-07
683	V84Y	Collaterally Neutral	Collaterally Neutral	Collaterally Sensitive	Collaterally Sensitive	0.763571034402043	0.821287050873046	0.960846498894818	0.995326979888886	0.236428965597957	0.178712949126954	0.0391535011051821	0.0046730201111144
684	D85A	Collaterally Neutral	Collaterally Sensitive	Collaterally Neutral	Collaterally Sensitive	0.875591881186504	0.886724804791505	0.871461400980777	0.999999999999944	0.124408118813496	0.113275195208495	0.128538599019223	5.54940282403737e-14
685	D85C	Collaterally Sensitive	Collaterally Sensitive	Collaterally Sensitive	Collaterally Sensitive	1	0.999999897881092	0.999999999964512	0.999880115193083	2.6056368016731e-32	1.0211890773812e-07	3.54880268566599e-11	0.000119884806916816
686	D85E	Collaterally Neutral	Collaterally Resistant	Collaterally Neutral	Collaterally Sensitive	0.523894095091404	0.00383781403020333	0.635638966410341	1	0.476105904908596	0.996162185969797	0.364361033589659	7.06604971580628e-107
687	D85G	Collaterally Sensitive	Collaterally Sensitive	Collaterally Sensitive	Collaterally Sensitive	0.89739767305053	0.955038644901671	0.995497442596808	0.999999999989443	0.10260232694947	0.0449613550983288	0.00450255740319179	1.05568415610186e-11
688	D85H	Collaterally Neutral	Collaterally Neutral	Collaterally Sensitive	Collaterally Sensitive	0.693925071016896	0.348944327237922	0.996263296713379	0.999999330641825	0.306074928983104	0.651055672762078	0.00373670328662089	6.69358174690988e-07
689	D85N	Collaterally Sensitive	Collaterally Neutral	Collaterally Sensitive	Collaterally Sensitive	1	0.638108008140652	1	0.999925360557101	9.78922975143892e-145	0.361891991859348	9.47486054169904e-20	7.4639442899463e-05
690	D85P	Collaterally Sensitive	Collaterally Sensitive	Collaterally Sensitive	Collaterally Sensitive	0.999550850594787	1	1	1	0.000449149405213131	8.07341012274227e-20	5.83457056662267e-172	3.6767345339578e-21
691	D85Q	Collaterally Sensitive	Collaterally Neutral	Collaterally Sensitive	Collaterally Sensitive	0.999906472545218	0.552313728355827	0.983453497513274	0.999994404706407	9.35274547816103e-05	0.447686271644173	0.0165465024867258	5.59529359281306e-06
692	D85R	Collaterally Sensitive	Collaterally Sensitive	Collaterally Sensitive	Collaterally Sensitive	0.999845420609762	0.999999999938368	0.995236666668698	1	0.000154579390238369	6.16316432231618e-11	0.00476333333130174	6.55148510914099e-152
693	D85S	Collaterally Sensitive	Collaterally Sensitive	Collaterally Sensitive	Collaterally Sensitive	1	0.994261195234364	0.999999965825983	0.99999999804845	2.9271313614703e-262	0.00573880476563572	3.41740164698383e-08	1.95154954863617e-09
694	D85T	Collaterally Sensitive	Collaterally Neutral	Collaterally Sensitive	Collaterally Sensitive	0.999999999999855	0.795947863496862	0.999959238502844	1	1.4470296826113e-13	0.204052136503138	4.07614971559856e-05	1.59306186915792e-133
695	D85V	Collaterally Neutral	Collaterally Neutral	Collaterally Sensitive	Collaterally Sensitive	0.789955082044224	0.414220836480818	0.999241784017714	1	0.210044917955776	0.585779163519182	0.000758215982286282	5.84129312260553e-301
696	D85Y	Collaterally Sensitive	Collaterally Sensitive	Collaterally Sensitive	Collaterally Sensitive	0.970900704033163	0.94987541496851	0.999947643163684	1	0.0290992959668375	0.0501245850314898	5.23568363161297e-05	0
697	A86C	Collaterally Neutral	Collaterally Neutral	Collaterally Sensitive	Collaterally Sensitive	0.281471886170151	0.334521494266743	1	0.997401778366995	0.718528113829849	0.665478505733257	5.36531163312012e-131	0.00259822163300543
698	A86D	Collaterally Neutral	Collaterally Neutral	Collaterally Resistant	Collaterally Neutral	0.65699830960458	0.259131693210639	0.0105353886433636	0.535369156045321	0.34300169039542	0.740868306789361	0.989464611356636	0.464630843954679
699	A86F	Collaterally Neutral	Collaterally Resistant	Collaterally Neutral	Collaterally Sensitive	0.409230593298323	0	0.329029397839818	0.999998129679102	0.590769406701677	1	0.670970602160182	1.87032089784606e-06
700	A86G	Collaterally Neutral	Collaterally Neutral	Collaterally Neutral	Collaterally Sensitive	0.840456711690333	0.199167247933665	0.321640220823198	0.999999985406118	0.159543288309667	0.800832752066335	0.678359779176802	1.45938820306108e-08
701	A86H	Collaterally Neutral	Collaterally Neutral	Collaterally Resistant	Collaterally Neutral	0.554615206857827	0.229333712013011	0	0.519047398383369	0.445384793142173	0.770666287986989	1	0.480952601616631
702	A86I	Collaterally Resistant	Collaterally Resistant	Collaterally Resistant	Collaterally Neutral	1.11022302462516e-16	0.00265526768048729	0.0877990025114364	0.660972833054731	1	0.997344732319513	0.912200997488564	0.339027166945269
703	A86K	Collaterally Resistant	Collaterally Resistant	Collaterally Resistant	Collaterally Resistant	0.0156788995154366	0.0129486646961168	0.000942660731103828	0	0.984321100484563	0.987051335303883	0.999057339268896	1
704	A86L	Collaterally Neutral	Collaterally Resistant	Collaterally Resistant	Collaterally Neutral	0.556800226653809	0.00193959331744731	0.0267670776512243	0.464873074893632	0.443199773346191	0.998060406682553	0.973232922348776	0.535126925106368
705	A86M	Collaterally Neutral	Collaterally Resistant	Collaterally Resistant	Collaterally Neutral	0.404517507312075	0.0362346300682325	0.112149452653657	0.614709236799038	0.595482492687925	0.963765369931768	0.887850547346343	0.385290763200962
706	A86N	Collaterally Neutral	Collaterally Resistant	Collaterally Resistant	Collaterally Neutral	0.173943892139117	0.00111617439542655	0.00187009439569663	0.217253799876599	0.826056107860883	0.998883825604573	0.998129905604303	0.782746200123401
707	A86P	Collaterally Sensitive	Collaterally Neutral	Collaterally Sensitive	Collaterally Sensitive	1	0.733151087301502	0.999999999991311	1	7.95165761244245e-67	0.266848912698498	8.6891507668598e-12	4.00214123993024e-27
708	A86Q	Collaterally Neutral	Collaterally Resistant	Collaterally Resistant	Collaterally Resistant	0.219224105619853	1.71260932047002e-06	1.65399749452178e-09	2.58015830922886e-13	0.780775894380147	0.99999828739068	0.999999998346003	0.999999999999742
709	A86R	Collaterally Resistant	Collaterally Resistant	Collaterally Resistant	Collaterally Neutral	0.052291753558257	5.86596575268272e-05	0.103684535698095	0.345427415524646	0.947708246441743	0.999941340342473	0.896315464301905	0.654572584475354
710	A86S	Collaterally Neutral	Collaterally Resistant	Collaterally Resistant	Collaterally Neutral	0.547198181718186	0.0432015818314245	0.0797629250782622	0.361154999760307	0.452801818281814	0.956798418168575	0.920237074921738	0.638845000239693
711	A86T	Collaterally Sensitive	Collaterally Resistant	Collaterally Resistant	Collaterally Neutral	0.962021063443713	3.02762976722715e-05	0.0105811495216566	0.659342461380496	0.0379789365562869	0.999969723702328	0.989418850478343	0.340657538619504
712	A86V	Collaterally Neutral	Collaterally Neutral	Collaterally Resistant	Collaterally Neutral	0.450222387848008	0.398839668491966	0.00020231656716474	0.729780291479449	0.549777612151992	0.601160331508034	0.999797683432835	0.270219708520551
713	A86W	Collaterally Resistant	Collaterally Neutral	Collaterally Neutral	Collaterally Sensitive	0.00915735160248077	0.171076041653363	0.216713078641822	0.990097996885141	0.990842648397519	0.828923958346637	0.783286921358178	0.00990200311485879
714	A86Y	Collaterally Sensitive	Collaterally Neutral	Collaterally Neutral	Collaterally Sensitive	0.947659591764571	0.544752217894851	0.147579954156912	1	0.0523404082354293	0.455247782105149	0.852420045843088	2.10931517549523e-21
715	G87A	Collaterally Neutral	Collaterally Sensitive	Collaterally Neutral	Collaterally Sensitive	0.414373126295085	0.999720887852747	0.709491196688602	0.999999651816433	0.585626873704915	0.000279112147252665	0.290508803311398	3.48183567241113e-07
716	G87C	Collaterally Neutral	Collaterally Sensitive	Collaterally Sensitive	Collaterally Sensitive	0.421014819720918	0.92905251898041	0.999599821843909	0.999999999162632	0.578985180279082	0.0709474810195899	0.00040017815609126	8.37368002467947e-10
717	G87D	Collaterally Neutral	Collaterally Neutral	Collaterally Sensitive	Collaterally Sensitive	0.780843133224549	0.797021686654654	1	0.999930597204143	0.219156866775451	0.202978313345346	8.63831433670477e-19	6.94027958565835e-05
718	G87E	Collaterally Neutral	Collaterally Neutral	Collaterally Sensitive	Collaterally Sensitive	0.208062581642428	0.603038913781663	0.905992616666522	0.991598026121125	0.791937418357572	0.396961086218337	0.0940073833334781	0.00840197387887538
719	G87F	Collaterally Resistant	Collaterally Resistant	Collaterally Neutral	Collaterally Sensitive	0.0897896098498907	0.0940069108054513	0.586963109929601	0.999999999999996	0.910210390150109	0.905993089194549	0.413036890070399	3.85648725930854e-15
720	G87I	Collaterally Neutral	Collaterally Neutral	Collaterally Sensitive	Collaterally Sensitive	0.392141823784811	0.50719034457192	0.999999326841892	1	0.607858176215189	0.49280965542808	6.73158108320188e-07	1.36502978664608e-22
721	G87L	Collaterally Neutral	Collaterally Neutral	Collaterally Sensitive	Collaterally Sensitive	0.305351097802576	0.851319691934067	0.980050682727016	0.99999999866241	0.694648902197424	0.148680308065933	0.0199493172729836	1.33759053343881e-09
722	G87M	Collaterally Neutral	Collaterally Neutral	Collaterally Neutral	Collaterally Sensitive	0.311638536755481	0.812143058710062	0.782220121137079	0.999999889491293	0.688361463244519	0.187856941289938	0.217779878862921	1.10508707425494e-07
723	G87P	Collaterally Neutral	Collaterally Sensitive	Collaterally Sensitive	Collaterally Sensitive	0.820889682752647	1	1	1	0.179110317247353	7.37355330209535e-31	3.53870558769924e-36	3.6002034315546e-39
724	G87R	Collaterally Neutral	Collaterally Sensitive	Collaterally Sensitive	Collaterally Sensitive	0.358538795252011	0.915352934743928	0.999994168130876	1	0.641461204747989	0.0846470652560721	5.83186912368396e-06	0
725	G87T	Collaterally Sensitive	Collaterally Neutral	Collaterally Sensitive	Collaterally Sensitive	1	0.853390197132296	0.999968738873762	0.999999999916139	2.07750047345217e-38	0.146609802867704	3.12611262375173e-05	8.38608186656331e-11
726	G87V	Collaterally Neutral	Collaterally Sensitive	Collaterally Sensitive	Collaterally Sensitive	0.522244383192928	0.949232486567544	0.914602699791586	1	0.477755616807072	0.050767513432456	0.0853973002084141	1.05043122244464e-62
727	G87W	Collaterally Neutral	Collaterally Neutral	Collaterally Sensitive	Collaterally Sensitive	0.258030579101153	0.84960435871995	0.988166562843351	1	0.741969420898847	0.15039564128005	0.011833437156649	0
728	Q88A	Collaterally Sensitive	Collaterally Sensitive	Collaterally Sensitive	Collaterally Neutral	1	0.990387845778564	0.907065775348819	0.702652194357475	0	0.00961215422143591	0.092934224651181	0.297347805642525
729	Q88C	Collaterally Neutral	Collaterally Neutral	Collaterally Sensitive	Collaterally Neutral	0.460649740969683	0.699013849499416	0.91680418581893	0.783564264523642	0.539350259030317	0.300986150500584	0.0831958141810698	0.216435735476357
730	Q88N	Collaterally Neutral	Collaterally Neutral	Collaterally Neutral	Collaterally Neutral	0.38692403878956	0.167879003563097	0.168665207653618	0.448801944333919	0.61307596121044	0.832120996436903	0.831334792346382	0.551198055666081
731	Q88P	Collaterally Neutral	Collaterally Sensitive	Collaterally Neutral	Collaterally Sensitive	0.790630784008468	0.99999950251862	0.720365066062187	0.988761336794925	0.209369215991532	4.97481379855935e-07	0.279634933937813	0.0112386632050752
732	Q88T	Collaterally Neutral	Collaterally Neutral	Collaterally Neutral	Collaterally Neutral	0.433051946315006	0.322828636906794	0.136495971403267	0.329161317749667	0.566948053684994	0.677171363093206	0.863504028596733	0.670838682250333
733	Q88Y	Collaterally Neutral	Collaterally Neutral	Collaterally Neutral	Collaterally Neutral	0.276298189243028	0.248301622442506	0.28079070749292	0.429134568071225	0.723701810756972	0.751698377557494	0.71920929250708	0.570865431928775
734	E89A	Collaterally Resistant	Collaterally Resistant	Collaterally Resistant	Collaterally Sensitive	0.000373806149868705	1.45782234062253e-08	1.89626092605977e-13	1	0.999626193850131	0.999999985421777	0.99999999999981	0
735	E89C	Collaterally Neutral	Collaterally Neutral	Collaterally Neutral	Collaterally Sensitive	0.226501599263454	0.43412527863409	0.257536915265884	0.999997703575245	0.773498400736546	0.56587472136591	0.742463084734116	2.29642475459115e-06
736	E89D	Collaterally Resistant	Collaterally Resistant	Collaterally Resistant	Collaterally Neutral	0.0966835337556706	0.109447228339335	0.067163644879713	0.768378728303671	0.903316466244329	0.890552771660665	0.932836355120287	0.231621271696329
737	E89G	Collaterally Resistant	Collaterally Neutral	Collaterally Sensitive	Collaterally Sensitive	0.0770830766774986	0.235383102700417	0.936102729880978	0.999999999988492	0.922916923322501	0.764616897299583	0.0638972701190216	1.15083080662702e-11
738	E89H	Collaterally Neutral	Collaterally Neutral	Collaterally Sensitive	Collaterally Sensitive	0.277514567345241	0.448680543168554	0.970160424198916	1	0.722485432654759	0.551319456831446	0.0298395758010842	0
739	E89I	Collaterally Neutral	Collaterally Neutral	Collaterally Neutral	Collaterally Neutral	0.4075082245461	0.279295872521393	0.216919874034044	0.565373993445751	0.5924917754539	0.720704127478607	0.783080125965956	0.434626006554249
740	E89K	Collaterally Neutral	Collaterally Sensitive	Collaterally Sensitive	Collaterally Sensitive	0.226279382429165	0.999999999997769	1	0.999870677222387	0.773720617570835	2.23138622634681e-12	5.1930604551652e-84	0.00012932277761259
741	E89L	Collaterally Neutral	Collaterally Neutral	Collaterally Resistant	Collaterally Neutral	0.387858248893629	0.238319120171796	0.0827789301666533	0.401826665490259	0.612141751106371	0.761680879828204	0.917221069833347	0.598173334509741
742	E89P	Collaterally Neutral	Collaterally Sensitive	Collaterally Sensitive	Collaterally Sensitive	0.202447754684211	1	1	1	0.797552245315789	2.77589637639323e-95	3.69392466839378e-67	0
743	E89Q	Collaterally Neutral	Collaterally Neutral	Collaterally Resistant	Collaterally Sensitive	0.179632080052578	0.19414202838208	0.0520607716874788	0.999841753078312	0.820367919947422	0.80585797161792	0.947939228312521	0.000158246921687544
744	E89R	Collaterally Neutral	Collaterally Sensitive	Collaterally Sensitive	Collaterally Sensitive	0.220666666477945	0.999999089113992	1	1	0.779333333522055	9.10886008445016e-07	1.39148205530246e-41	1.54445556537876e-38
745	E89S	Collaterally Neutral	Collaterally Neutral	Collaterally Resistant	Collaterally Sensitive	0.215451745149463	0.286695765160092	0.100233679046908	1	0.784548254850537	0.713304234839908	0.899766320953092	0
746	E89T	Collaterally Neutral	Collaterally Resistant	Collaterally Resistant	Collaterally Sensitive	0.259468868846563	0.017058405448127	0.0100216294672473	0.999999999331343	0.740531131153437	0.982941594551873	0.989978370532753	6.68657464607252e-10
747	E89V	Collaterally Neutral	Collaterally Neutral	Collaterally Neutral	Collaterally Sensitive	0.29758393430493	0.275659677037801	0.274533736210404	0.915441285921671	0.70241606569507	0.724340322962199	0.725466263789596	0.084558714078329
748	E89W	Collaterally Neutral	Collaterally Neutral	Collaterally Sensitive	Collaterally Sensitive	0.415450048621363	0.435690894446695	0.908608997627848	1	0.584549951378637	0.564309105553305	0.0913910023721523	5.75943001396447e-24
749	Q90C	Collaterally Sensitive	Collaterally Sensitive	Collaterally Sensitive	Collaterally Sensitive	0.999527754705104	0.977730949917203	0.992045605160574	0.974322886199656	0.000472245294895784	0.0222690500827971	0.00795439483942642	0.0256771138003443
750	Q90D	Collaterally Neutral	Collaterally Neutral	Collaterally Neutral	Collaterally Resistant	0.393341618645912	0.52467211217836	0.18677946366724	0	0.606658381354088	0.47532788782164	0.81322053633276	1
751	Q90E	Collaterally Neutral	Collaterally Neutral	Collaterally Resistant	Collaterally Neutral	0.351174505438824	0.239761587726187	0.000765428925880163	0.375736189079319	0.648825494561176	0.760238412273813	0.99923457107412	0.624263810920681
752	Q90F	Collaterally Neutral	Collaterally Neutral	Collaterally Neutral	Collaterally Sensitive	0.50810051281432	0.723611900973048	0.251338319263805	0.915448858600129	0.49189948718568	0.276388099026952	0.748661680736195	0.0845511413998711
753	Q90G	Collaterally Neutral	Collaterally Neutral	Collaterally Resistant	Collaterally Sensitive	0.62941899053278	0.149732172092699	0.0246028378178156	1	0.37058100946722	0.850267827907301	0.975397162182184	8.54063265623844e-42
754	Q90L	Collaterally Neutral	Collaterally Neutral	Collaterally Resistant	Collaterally Neutral	0.668491746578484	0.770761787783638	0	0.652629737386021	0.331508253421516	0.229238212216362	1	0.347370262613979
755	Q90M	Collaterally Neutral	Collaterally Neutral	Collaterally Resistant	Collaterally Sensitive	0.729992827318939	0.178009244501921	0	0.999999999954403	0.270007172681061	0.821990755498079	1	4.55965905875743e-11
756	Q90N	Collaterally Resistant	Collaterally Resistant	Collaterally Neutral	Collaterally Neutral	0.0074237155303789	7.3709294092672e-05	0.149643197741906	0.226230666394033	0.992576284469621	0.999926290705907	0.850356802258094	0.773769333605967
757	Q90P	Collaterally Neutral	Collaterally Neutral	Collaterally Sensitive	Collaterally Sensitive	0.522136238664366	0.605207368602661	0.993777607606003	1	0.477863761335634	0.394792631397339	0.0062223923939972	3.0731359032992e-47
758	Q90R	Collaterally Neutral	Collaterally Neutral	Collaterally Neutral	Collaterally Neutral	0.458210598401944	0.444680106926726	0.163355202655085	0.368746056854903	0.541789401598056	0.555319893073274	0.836644797344915	0.631253943145097
759	Q90V	Collaterally Neutral	Collaterally Neutral	Collaterally Resistant	Collaterally Neutral	0.55704148001094	0.680754528872459	1.85456222747682e-05	0.634389185736965	0.44295851998906	0.319245471127541	0.999981454377725	0.365610814263035
760	Q90W	Collaterally Resistant	Collaterally Resistant	Collaterally Resistant	Collaterally Resistant	0.0851581829363849	0	0.000531111024098974	0	0.914841817063615	1	0.999468888975901	1
761	L91A	Collaterally Resistant	Collaterally Neutral	Collaterally Resistant	Collaterally Sensitive	0.094058206071244	0.428732151178088	0.0933664304009937	1	0.905941793928756	0.571267848821912	0.906633569599006	8.29879532606598e-19
762	L91C	Collaterally Neutral	Collaterally Neutral	Collaterally Sensitive	Collaterally Sensitive	0.81628292546717	0.499072785116115	0.914536271766859	0.999999994937681	0.18371707453283	0.500927214883885	0.0854637282331411	5.0623188286561e-09
763	L91D	Collaterally Neutral	Collaterally Neutral	Collaterally Sensitive	Collaterally Sensitive	0.75563074442852	0.640306079611495	0.889848502363438	0.999931892105893	0.24436925557148	0.359693920388505	0.110151497636562	6.81078941071195e-05
764	L91E	Collaterally Neutral	Collaterally Neutral	Collaterally Neutral	Collaterally Sensitive	0.546143001253148	0.841438396011502	0.84869904914606	0.997593453187899	0.453856998746852	0.158561603988498	0.15130095085394	0.00240654681210094
765	L91F	Collaterally Neutral	Collaterally Sensitive	Collaterally Neutral	Collaterally Sensitive	0.651839502614811	1	0.645380392167985	0.978766468688471	0.348160497385189	7.6763418391673e-25	0.354619607832015	0.0212335313115295
766	L91G	Collaterally Sensitive	Collaterally Neutral	Collaterally Neutral	Collaterally Sensitive	1	0.726824658721718	0.829697734986452	1	5.41639477323403e-34	0.273175341278282	0.170302265013548	3.35542923032458e-37
767	L91H	Collaterally Neutral	Collaterally Neutral	Collaterally Sensitive	Collaterally Sensitive	0.183714928875017	0.523131944511991	0.890464373073455	0.999999992839434	0.816285071124983	0.476868055488009	0.109535626926545	7.16056628174832e-09
768	L91I	Collaterally Neutral	Collaterally Neutral	Collaterally Neutral	Collaterally Sensitive	0.307396798577008	0.541998892862995	0.303105706492216	0.998308925288777	0.692603201422992	0.458001107137005	0.696894293507784	0.00169107471122296
769	L91K	Collaterally Sensitive	Collaterally Sensitive	Collaterally Sensitive	Collaterally Sensitive	0.999999999990901	0.90159583639296	0.99411319385542	1	9.09865020870814e-12	0.0984041636070395	0.00588680614457976	9.37275778000619e-22
770	L91N	Collaterally Sensitive	Collaterally Sensitive	Collaterally Sensitive	Collaterally Sensitive	1	0.9993231740843	0.942965973033614	1	1.53646536453205e-80	0.000676825915699647	0.0570340269663859	0
771	L91P	Collaterally Neutral	Collaterally Neutral	Collaterally Neutral	Collaterally Sensitive	0.38074133242843	0.601916928235985	0.607276560372369	0.999952785069749	0.61925866757157	0.398083071764015	0.392723439627631	4.72149302508812e-05
772	L91Q	Collaterally Neutral	Collaterally Sensitive	Collaterally Neutral	Collaterally Sensitive	0.328283857129912	0.903732692108833	0.842340082318477	0.999992742477694	0.671716142870088	0.0962673078911666	0.157659917681523	7.25752230570896e-06
773	L91R	Collaterally Neutral	Collaterally Sensitive	Collaterally Sensitive	Collaterally Sensitive	0.739393498160801	1	0.999586905713139	0.999987574025301	0.260606501839199	7.84710578459089e-41	0.000413094286861105	1.24259746987014e-05
774	L91S	Collaterally Resistant	Collaterally Neutral	Collaterally Neutral	Collaterally Sensitive	0.0291666087458509	0.282442341423038	0.689972810700883	1	0.970833391254149	0.717557658576962	0.310027189299117	1.05596141193399e-25
775	L91T	Collaterally Resistant	Collaterally Neutral	Collaterally Neutral	Collaterally Sensitive	0.00536612642378642	0.860627730548907	0.704253696902277	0.999999999999729	0.994633873576214	0.139372269451093	0.295746303097723	2.71117486181038e-13
776	L91V	Collaterally Neutral	Collaterally Neutral	Collaterally Neutral	Collaterally Sensitive	0.700468358201388	0.624210036030623	0.433723906657361	0.999999999999891	0.299531641798612	0.375789963969377	0.566276093342639	1.08990213180553e-13
777	L91W	Collaterally Neutral	Collaterally Resistant	Collaterally Neutral	Collaterally Sensitive	0.3291674853078	0.0097147771486501	0.37248556658278	0.999994090067243	0.6708325146922	0.99028522285135	0.62751443341722	5.90993275652645e-06
778	L91Y	Collaterally Neutral	Collaterally Neutral	Collaterally Neutral	Collaterally Sensitive	0.477207009447257	0.643473947093551	0.353581825839645	1	0.522792990552743	0.356526052906449	0.646418174160355	0
779	G92A	Collaterally Neutral	Collaterally Neutral	Collaterally Neutral	Collaterally Sensitive	0.193108224475224	0.824596999182462	0.428396166993803	0.992431212549437	0.806891775524776	0.175403000817538	0.571603833006197	0.0075687874505626
780	G92C	Collaterally Neutral	Collaterally Neutral	Collaterally Neutral	Collaterally Sensitive	0.457333034514324	0.450516005733351	0.488783074494406	0.999999999979303	0.542666965485676	0.549483994266649	0.511216925505594	2.06967041937805e-11
781	G92D	Collaterally Neutral	Collaterally Sensitive	Collaterally Neutral	Collaterally Sensitive	0.820751936144154	0.987037016680819	0.610288820943993	0.907430552179826	0.179248063855846	0.0129629833191808	0.389711179056007	0.0925694478201737
782	G92E	Collaterally Neutral	Collaterally Neutral	Collaterally Neutral	Collaterally Resistant	0.700744279671029	0.647219450458413	0.312772417455068	0.00227384123223773	0.299255720328971	0.352780549541587	0.687227582544932	0.997726158767762
783	G92F	Collaterally Neutral	Collaterally Sensitive	Collaterally Neutral	Collaterally Sensitive	0.604499100866133	0.968789620725033	0.198153355796507	0.937049238034601	0.395500899133867	0.0312103792749672	0.801846644203493	0.0629507619653989
784	G92H	Collaterally Neutral	Collaterally Neutral	Collaterally Neutral	Collaterally Neutral	0.507102275749318	0.76577269798584	0.556365672841734	0.668346401634465	0.492897724250682	0.23422730201416	0.443634327158266	0.331653598365535
785	G92I	Collaterally Sensitive	Collaterally Neutral	Collaterally Resistant	Collaterally Sensitive	0.952176298748617	0.781982644558952	1.49528500692497e-10	0.994454336435666	0.0478237012513831	0.218017355441048	0.999999999850471	0.00554566356433435
786	G92K	Collaterally Neutral	Collaterally Neutral	Collaterally Neutral	Collaterally Sensitive	0.742924793361558	0.850713892736816	0.631209715467415	0.957806397137299	0.257075206638442	0.149286107263184	0.368790284532585	0.0421936028627011
787	G92M	Collaterally Neutral	Collaterally Sensitive	Collaterally Neutral	Collaterally Sensitive	0.396194854426021	0.999983604720489	0.641125092103278	0.991650522293446	0.603805145573979	1.63952795109197e-05	0.358874907896722	0.0083494777065542
788	G92N	Collaterally Neutral	Collaterally Sensitive	Collaterally Sensitive	Collaterally Resistant	0.340835503419236	0.961781487272771	0.965928749703895	0.0480775291169792	0.659164496580764	0.0382185127272291	0.0340712502961046	0.951922470883021
789	G92P	Collaterally Neutral	Collaterally Sensitive	Collaterally Neutral	Collaterally Sensitive	0.558945609847177	1	0.672308431834706	0.991515952980444	0.441054390152823	1.28292464321947e-104	0.327691568165294	0.00848404701955635
790	G92R	Collaterally Neutral	Collaterally Neutral	Collaterally Neutral	Collaterally Sensitive	0.717916643162582	0.665442814604622	0.67168910781384	0.975594566014994	0.282083356837418	0.334557185395378	0.32831089218616	0.0244054339850063
791	G92S	Collaterally Neutral	Collaterally Neutral	Collaterally Neutral	Collaterally Sensitive	0.61032023439666	0.861678611733247	0.710797837432732	0.97144881001131	0.38967976560334	0.138321388266753	0.289202162567268	0.0285511899886902
792	G92T	Collaterally Neutral	Collaterally Sensitive	Collaterally Neutral	Collaterally Neutral	0.657505309595723	1	0.604521953830112	0.776350425401273	0.342494690404277	2.37054871806089e-35	0.395478046169888	0.223649574598727
793	G92V	Collaterally Neutral	Collaterally Sensitive	Collaterally Sensitive	Collaterally Sensitive	0.552660819310367	0.88624117339744	0.943676938933014	0.962049724769524	0.447339180689633	0.11375882660256	0.0563230610669859	0.037950275230476
794	R93A	Collaterally Resistant	Collaterally Neutral	Collaterally Neutral	Collaterally Sensitive	0.0274856835510224	0.415713830246562	0.386129086103855	0.999722054389257	0.972514316448978	0.584286169753438	0.613870913896145	0.000277945610743261
795	R93C	Collaterally Neutral	Collaterally Neutral	Collaterally Sensitive	Collaterally Sensitive	0.164531465276561	0.700868282390945	0.999974293813733	0.998048093884952	0.835468534723439	0.299131717609055	2.57061862667117e-05	0.00195190611504814
796	R93D	Collaterally Neutral	Collaterally Resistant	Collaterally Neutral	Collaterally Sensitive	0.2767929089981	0.0222084268172679	0.799600776311293	0.999999955323638	0.7232070910019	0.977791573182732	0.200399223688707	4.4676362358609e-08
797	R93I	Collaterally Neutral	Collaterally Neutral	Collaterally Sensitive	Collaterally Sensitive	0.442289121730667	0.469555877641497	0.999588019550329	1	0.557710878269333	0.530444122358503	0.000411980449671227	3.36860480269775e-84
798	R93K	Collaterally Resistant	Collaterally Resistant	Collaterally Neutral	Collaterally Sensitive	0.0254629220328896	0	0.694722784467122	0.914375886211262	0.97453707796711	1	0.305277215532878	0.0856241137887378
799	R93L	Collaterally Neutral	Collaterally Sensitive	Collaterally Sensitive	Collaterally Sensitive	0.172064554241619	0.999924210796119	0.895337748458539	1	0.827935445758381	7.57892038814545e-05	0.104662251541461	1.77888981748701e-97
800	R93Q	Collaterally Resistant	Collaterally Neutral	Collaterally Resistant	Collaterally Sensitive	0	0.312750343636591	0.00178337898684522	0.999999828913587	1	0.687249656363409	0.998216621013155	1.71086413459718e-07
801	R93S	Collaterally Neutral	Collaterally Sensitive	Collaterally Neutral	Collaterally Sensitive	0.213117752014424	0.985070702177724	0.389201949061203	1	0.786882247985576	0.0149292978222765	0.610798050938797	0
802	R93T	Collaterally Neutral	Collaterally Neutral	Collaterally Neutral	Collaterally Sensitive	0.306931847491244	0.532981336475774	0.317291489835432	0.999795863235837	0.693068152508756	0.467018663524226	0.682708510164568	0.000204136764162692
803	R93V	Collaterally Neutral	Collaterally Neutral	Collaterally Sensitive	Collaterally Sensitive	0.339284639522642	0.581633317156899	0.951636227126582	1	0.660715360477358	0.418366682843101	0.0483637728734181	1.42491701316992e-137
804	R93W	Collaterally Neutral	Collaterally Neutral	Collaterally Sensitive	Collaterally Sensitive	0.264053723136901	0.537110914987046	0.983756988386925	0.999343440068171	0.735946276863099	0.462889085012954	0.0162430116130746	0.000656559931829038
805	R93Y	Collaterally Resistant	Collaterally Neutral	Collaterally Neutral	Collaterally Sensitive	0.00523510228303292	0.56553198153876	0.754310469349522	0.999566492927059	0.994764897716967	0.43446801846124	0.245689530650478	0.000433507072941473
806	R94K	Collaterally Resistant	Collaterally Resistant	Collaterally Resistant	Collaterally Neutral	5.96189764223709e-14	1.32449606837781e-13	0	0.382877390784876	0.99999999999994	0.999999999999868	1	0.617122609215124
807	R94P	Collaterally Neutral	Collaterally Resistant	Collaterally Neutral	Collaterally Sensitive	0.153077161058733	2.44452855657773e-06	0.132318209677582	0.996752926560185	0.846922838941267	0.999997555471443	0.867681790322418	0.0032470734398155
808	R94Q	Collaterally Neutral	Collaterally Resistant	Collaterally Neutral	Collaterally Sensitive	0.146289809575588	2.76796715437122e-06	0.137843360622928	0.895292194534286	0.853710190424412	0.999997232032846	0.862156639377072	0.104707805465714
809	R94W	Collaterally Neutral	Collaterally Resistant	Collaterally Resistant	Collaterally Sensitive	0.747046888940378	0.0721940405389607	0.0389328788232399	0.975869956985372	0.252953111059622	0.927805959461039	0.96106712117676	0.0241300430146282
810	I95A	Collaterally Resistant	Collaterally Resistant	Collaterally Sensitive	Collaterally Sensitive	0.000122809153830339	0.0763363971893989	1	0.999999998926469	0.99987719084617	0.923663602810601	4.27840605276337e-20	1.07353057421276e-09
811	I95C	Collaterally Neutral	Collaterally Neutral	Collaterally Sensitive	Collaterally Sensitive	0.380633450503575	0.377527428872704	0.918782483064694	0.999999999846159	0.619366549496425	0.622472571127296	0.0812175169353063	1.53841406823171e-10
812	I95D	Collaterally Neutral	Collaterally Sensitive	Collaterally Sensitive	Collaterally Sensitive	0.161251309673548	1	1	0.999998671296767	0.838748690326452	5.55693336957398e-29	7.61149713546195e-20	1.32870323269663e-06
813	I95E	Collaterally Resistant	Collaterally Neutral	Collaterally Sensitive	Collaterally Sensitive	0.0221128684599914	0.162673735235628	0.99999910796902	0.9999983776084	0.977887131540009	0.837326264764372	8.92030979966332e-07	1.62239160007087e-06
814	I95F	Collaterally Neutral	Collaterally Neutral	Collaterally Neutral	Collaterally Sensitive	0.470886197675537	0.326211442394852	0.80408500946462	0.997929686611876	0.529113802324463	0.673788557605148	0.19591499053538	0.00207031338812382
815	I95G	Collaterally Neutral	Collaterally Sensitive	Collaterally Sensitive	Collaterally Sensitive	0.600851014149356	1	1	1	0.399148985850644	4.6406829402646e-60	2.35167154974779e-72	2.22672404796402e-65
816	I95H	Collaterally Resistant	Collaterally Neutral	Collaterally Sensitive	Collaterally Sensitive	1.01282282982673e-06	0.472809350150252	0.902673937305836	0.999986491528916	0.99999898717717	0.527190649849748	0.0973260626941635	1.35084710837991e-05
817	I95K	Collaterally Resistant	Collaterally Resistant	Collaterally Sensitive	Collaterally Sensitive	0.00689369521324878	0	0.999982468438931	0.999999988885299	0.993106304786751	1	1.75315610692981e-05	1.11147015370679e-08
818	I95L	Collaterally Resistant	Collaterally Neutral	Collaterally Neutral	Collaterally Neutral	0.0479209217269936	0.251005064957674	0.567514385144108	0.429605159181827	0.952079078273006	0.748994935042326	0.432485614855892	0.570394840818173
819	I95M	Collaterally Resistant	Collaterally Neutral	Collaterally Neutral	Collaterally Sensitive	0.0583944989375934	0.308057572277657	0.457318099023228	0.999999999995755	0.941605501062407	0.691942427722343	0.542681900976772	4.2447845940115e-12
820	I95P	Collaterally Resistant	Collaterally Sensitive	Collaterally Sensitive	Collaterally Sensitive	0.00468300125409349	1	0.999999999995103	1	0.995316998745907	1.33482860960262e-49	4.89705366122393e-12	1.34758041531298e-17
821	I95Q	Collaterally Neutral	Collaterally Resistant	Collaterally Sensitive	Collaterally Sensitive	0.226741561947344	0.0291709295710521	0.992689690581444	0.999999962856013	0.773258438052656	0.970829070428948	0.007310309418556	3.71439872394771e-08
822	I95R	Collaterally Resistant	Collaterally Sensitive	Collaterally Sensitive	Collaterally Sensitive	0.0539022525090446	0.99070323614528	1	1	0.946097747490955	0.00929676385471967	2.689197751212e-43	3.34630048705764e-67
823	I95S	Collaterally Resistant	Collaterally Sensitive	Collaterally Sensitive	Collaterally Sensitive	0.00503785818598457	0.921730529434291	1	1	0.994962141814015	0.0782694705657087	9.52473293020045e-34	4.68591267265208e-25
824	I95T	Collaterally Resistant	Collaterally Neutral	Collaterally Sensitive	Collaterally Sensitive	0	0.250993462863737	0.95585472134671	0.99999999999991	1	0.749006537136263	0.0441452786532904	9.00974457731166e-14
825	I95V	Collaterally Resistant	Collaterally Resistant	Collaterally Neutral	Collaterally Neutral	1.3871177984015e-08	0.0931009616993851	0.450546763701495	0.289181524728593	0.999999986128822	0.906899038300615	0.549453236298505	0.710818475271407
826	I95W	Collaterally Neutral	Collaterally Neutral	Collaterally Sensitive	Collaterally Sensitive	0.160773976114601	0.148862549498424	1	1	0.839226023885399	0.851137450501576	1.5438924349899e-48	7.24892321929228e-258
827	I95Y	Collaterally Resistant	Collaterally Neutral	Collaterally Neutral	Collaterally Sensitive	0.00096698921885241	0.374394241228189	0.745601182723043	0.980658036389136	0.999033010781148	0.625605758771811	0.254398817276957	0.0193419636108643
828	H96A	Collaterally Neutral	Collaterally Neutral	Collaterally Sensitive	Collaterally Neutral	0.626320083651409	0.469474076133083	1	0.832297664547283	0.373679916348591	0.530525923866917	0	0.167702335452717
829	H96C	Collaterally Sensitive	Collaterally Neutral	Collaterally Sensitive	Collaterally Sensitive	0.999999806366661	0.555251854093061	0.898184196913212	0.999999953244646	1.93633339131714e-07	0.444748145906939	0.101815803086788	4.6755354304594e-08
830	H96D	Collaterally Neutral	Collaterally Neutral	Collaterally Neutral	Collaterally Sensitive	0.571047761920284	0.497566433410704	0.738916980091169	0.984290238603146	0.428952238079716	0.502433566589296	0.261083019908831	0.0157097613968536
831	H96F	Collaterally Neutral	Collaterally Neutral	Collaterally Neutral	Collaterally Neutral	0.725885517765362	0.55844832638607	0.543767345267418	0.691554770981265	0.274114482234638	0.44155167361393	0.456232654732582	0.308445229018734
832	H96G	Collaterally Sensitive	Collaterally Neutral	Collaterally Neutral	Collaterally Sensitive	0.999978496027874	0.538541704787859	0.776802379279642	1	2.15039721256735e-05	0.461458295212141	0.223197620720358	1.25243350524409e-161
833	H96Q	Collaterally Neutral	Collaterally Neutral	Collaterally Neutral	Collaterally Neutral	0.426410945919143	0.552265194475009	0.217566955311036	0.565134666053589	0.573589054080857	0.447734805524991	0.782433044688964	0.434865333946411
834	H96T	Collaterally Sensitive	Collaterally Neutral	Collaterally Neutral	Collaterally Sensitive	0.888785200228139	0.573617335867646	0.86545043310516	0.975231769162174	0.111214799771861	0.426382664132354	0.13454956689484	0.0247682308378265
835	H96Y	Collaterally Sensitive	Collaterally Neutral	Collaterally Neutral	Collaterally Neutral	0.947564139500386	0.49396254936143	0.509218656151402	0.832568627875864	0.052435860499614	0.50603745063857	0.490781343848598	0.167431372124136
836	Y97A	Collaterally Neutral	Collaterally Sensitive	Collaterally Sensitive	Collaterally Sensitive	0.836435108877032	0.900678581455099	0.998373283793864	1	0.163564891122968	0.0993214185449007	0.00162671620613581	1.02471174777744e-41
837	Y97C	Collaterally Sensitive	Collaterally Sensitive	Collaterally Sensitive	Collaterally Sensitive	0.995907682375766	0.984953897147426	0.999999999968529	0.912156569792985	0.00409231762423434	0.0150461028525742	3.14708320241326e-11	0.0878434302070146
838	Y97H	Collaterally Neutral	Collaterally Neutral	Collaterally Sensitive	Collaterally Sensitive	0.513086627983854	0.703923098844283	0.915996406611193	1	0.486913372016146	0.296076901155717	0.0840035933888068	5.39241678949944e-291
839	Y97K	Collaterally Neutral	Collaterally Sensitive	Collaterally Sensitive	Collaterally Sensitive	0.833512886297372	0.999999999937204	1	0.999999999771288	0.166487113702628	6.27960259025347e-11	3.0800171119663e-32	2.28712037151065e-10
840	Y97R	Collaterally Sensitive	Collaterally Sensitive	Collaterally Sensitive	Collaterally Sensitive	0.923123826978122	0.999867858822729	0.992789037799165	0.999955369296043	0.0768761730218775	0.000132141177271395	0.00721096220083495	4.46307039572389e-05
841	S98C	Collaterally Neutral	Collaterally Sensitive	Collaterally Sensitive	Collaterally Sensitive	0.714939159562948	0.999617338300089	1	0.970577425247109	0.285060840437052	0.000382661699911217	4.35792013328993e-36	0.0294225747528913
842	S98D	Collaterally Neutral	Collaterally Neutral	Collaterally Sensitive	Collaterally Neutral	0.433818494757929	0.764293650257133	0.931980594360377	0.568098202958895	0.566181505242071	0.235706349742867	0.0680194056396226	0.431901797041105
843	S98E	Collaterally Neutral	Collaterally Neutral	Collaterally Neutral	Collaterally Resistant	0.386325767870013	0.652505316451187	0.689991096342488	0.031444075907884	0.613674232129987	0.347494683548813	0.310008903657512	0.968555924092116
844	S98F	Collaterally Neutral	Collaterally Sensitive	Collaterally Neutral	Collaterally Sensitive	0.874273881375987	0.993519947612698	0.669687280785572	0.955061524271261	0.125726118624013	0.00648005238730206	0.330312719214428	0.0449384757287389
845	S98G	Collaterally Neutral	Collaterally Neutral	Collaterally Neutral	Collaterally Neutral	0.259014391053394	0.53718960423854	0.220141381625024	0.157408371182207	0.740985608946606	0.462810395761459	0.779858618374976	0.842591628817793
846	S98H	Collaterally Sensitive	Collaterally Neutral	Collaterally Sensitive	Collaterally Resistant	0.999282739614904	0.792242045288817	1	2.95863320665113e-06	0.000717260385096093	0.207757954711183	9.57282685607324e-151	0.999997041366793
847	S98I	Collaterally Neutral	Collaterally Neutral	Collaterally Resistant	Collaterally Sensitive	0.272624185968965	0.559890458421159	0	0.92436535919675	0.727375814031035	0.440109541578841	1	0.0756346408032505
848	S98K	Collaterally Sensitive	Collaterally Neutral	Collaterally Sensitive	Collaterally Neutral	0.878480451123683	0.676634581967731	0.957651109655115	0.538112111891685	0.121519548876317	0.323365418032269	0.0423488903448847	0.461887888108315
849	S98L	Collaterally Neutral	Collaterally Neutral	Collaterally Neutral	Collaterally Sensitive	0.376012289853819	0.506601297028261	0.404163712504156	0.995578176000615	0.623987710146181	0.493398702971739	0.595836287495844	0.0044218239993846
850	S98M	Collaterally Neutral	Collaterally Resistant	Collaterally Neutral	Collaterally Neutral	0.395767980670429	0.00447093189958536	0.404457351783645	0.61792484528289	0.604232019329571	0.995529068100415	0.595542648216355	0.38207515471711
851	S98P	Collaterally Neutral	Collaterally Sensitive	Collaterally Neutral	Collaterally Sensitive	0.53025237688818	0.963132985364551	0.775776470385953	1	0.46974762311182	0.0368670146354494	0.224223529614047	6.64146218089129e-69
852	S98Q	Collaterally Neutral	Collaterally Neutral	Collaterally Sensitive	Collaterally Resistant	0.699048660596855	0.140090593909738	0.996767597642606	0.110123437797895	0.300951339403145	0.859909406090262	0.00323240235739442	0.889876562202105
853	S98R	Collaterally Sensitive	Collaterally Neutral	Collaterally Sensitive	Collaterally Neutral	1	0.742867792121039	0.999999999999996	0.463204450666214	0	0.257132207878961	3.90035991206055e-15	0.536795549333786
854	S98T	Collaterally Neutral	Collaterally Neutral	Collaterally Sensitive	Collaterally Neutral	0.347853655012364	0.368758420089331	0.999989862449709	0.293629831043962	0.652146344987636	0.631241579910669	1.01375502906745e-05	0.706370168956038
855	S98V	Collaterally Neutral	Collaterally Sensitive	Collaterally Neutral	Collaterally Neutral	0.553392243584251	0.926206285143608	0.65358803289637	0.853540972733882	0.446607756415749	0.0737937148563921	0.34641196710363	0.146459027266118
856	S98W	Collaterally Neutral	Collaterally Sensitive	Collaterally Sensitive	Collaterally Sensitive	0.771410664819863	0.977696063859619	0.986979006743484	0.999885499766774	0.228589335180137	0.0223039361403806	0.0130209932565159	0.000114500233226413
857	S98Y	Collaterally Sensitive	Collaterally Sensitive	Collaterally Sensitive	Collaterally Sensitive	0.92486513033361	0.993242892197816	0.905725028241063	1	0.0751348696663902	0.00675710780218419	0.0942749717589374	7.40509944124917e-137
858	Q99A	Collaterally Sensitive	Collaterally Neutral	Collaterally Neutral	Collaterally Neutral	1	0.392566193519081	0.231127441316595	0.66815356638642	2.59704305611577e-21	0.607433806480919	0.768872558683405	0.33184643361358
859	Q99C	Collaterally Neutral	Collaterally Sensitive	Collaterally Neutral	Collaterally Sensitive	0.673610625529348	1	0.391548824170301	1	0.326389374470652	1.02526026799061e-22	0.608451175829699	2.10477325758371e-55
860	Q99D	Collaterally Neutral	Collaterally Neutral	Collaterally Resistant	Collaterally Neutral	0.315219590211205	0.466532010919805	0.00322657352825462	0.513228413305376	0.684780409788795	0.533467989080195	0.996773426471745	0.486771586694624
861	Q99E	Collaterally Neutral	Collaterally Neutral	Collaterally Neutral	Collaterally Neutral	0.790826915398369	0.471168559272051	0.174565253361201	0.47006130924752	0.209173084601631	0.528831440727949	0.825434746638799	0.52993869075248
862	Q99F	Collaterally Neutral	Collaterally Neutral	Collaterally Resistant	Collaterally Neutral	0.294983396644802	0.243773728424116	0.0380384519445074	0.724967738440832	0.705016603355198	0.756226271575884	0.961961548055493	0.275032261559168
863	Q99G	Collaterally Sensitive	Collaterally Resistant	Collaterally Neutral	Collaterally Neutral	0.88878511506626	0.082824453229743	0.180475273770289	0.671527035250824	0.11121488493374	0.917175546770257	0.819524726229711	0.328472964749176
864	Q99H	Collaterally Neutral	Collaterally Neutral	Collaterally Neutral	Collaterally Neutral	0.657473390859674	0.853213464103632	0.374507287718283	0.718464119270428	0.342526609140326	0.146786535896368	0.625492712281717	0.281535880729572
865	Q99I	Collaterally Sensitive	Collaterally Sensitive	Collaterally Neutral	Collaterally Sensitive	0.999999995978316	0.999284459666549	0.498313988564577	0.958692525921304	4.02168393936405e-09	0.000715540333450586	0.501686011435423	0.0413074740786963
866	Q99K	Collaterally Neutral	Collaterally Resistant	Collaterally Sensitive	Collaterally Neutral	0.502838368848233	4.83847406584914e-11	0.883708530225608	0.545771642779453	0.497161631151767	0.999999999951615	0.116291469774392	0.454228357220547
867	Q99L	Collaterally Neutral	Collaterally Sensitive	Collaterally Neutral	Collaterally Neutral	0.781316106892787	0.989048862156733	0.280280901746858	0.680170467323033	0.218683893107213	0.010951137843267	0.719719098253142	0.319829532676967
868	Q99M	Collaterally Sensitive	Collaterally Neutral	Collaterally Neutral	Collaterally Sensitive	0.975072023533167	0.601318649600607	0.846530443278603	0.997485727097933	0.0249279764668326	0.398681350399393	0.153469556721397	0.00251427290206738
869	Q99N	Collaterally Neutral	Collaterally Sensitive	Collaterally Neutral	Collaterally Sensitive	0.675991837318248	0.9986929674342	0.193197607282101	0.937524004050753	0.324008162681752	0.00130703256579952	0.806802392717899	0.062475995949247
870	Q99P	Collaterally Neutral	Collaterally Neutral	Collaterally Neutral	Collaterally Neutral	0.789808809945642	0.464617978205067	0.387438039184105	0.762387300601552	0.210191190054358	0.535382021794933	0.612561960815895	0.237612699398448
871	Q99R	Collaterally Neutral	Collaterally Neutral	Collaterally Resistant	Collaterally Neutral	0.697004032505788	0.617670546128104	0.108632498087009	0.646998795870534	0.302995967494211	0.382329453871896	0.891367501912991	0.353001204129466
872	Q99S	Collaterally Sensitive	Collaterally Sensitive	Collaterally Resistant	Collaterally Neutral	0.99954746988127	0.989712811357585	0.115789054171065	0.624460195242804	0.000452530118729966	0.0102871886424148	0.884210945828935	0.375539804757196
873	Q99T	Collaterally Sensitive	Collaterally Neutral	Collaterally Neutral	Collaterally Sensitive	1	0.803448943272749	0.327757753753377	0.977686926062721	3.52347443153454e-40	0.196551056727251	0.672242246246623	0.0223130739372785
874	Q99V	Collaterally Neutral	Collaterally Resistant	Collaterally Neutral	Collaterally Resistant	0.287569832692829	0.0134329111755594	0.123877777637107	0.00279906709908595	0.712430167307171	0.986567088824441	0.876122222362893	0.997200932900914
875	Q99W	Collaterally Sensitive	Collaterally Neutral	Collaterally Neutral	Collaterally Sensitive	0.96281113986855	0.584553815645955	0.439882361528993	0.941281251149858	0.0371888601314499	0.415446184354045	0.560117638471007	0.0587187488501418
876	Q99Y	Collaterally Sensitive	Collaterally Neutral	Collaterally Neutral	Collaterally Sensitive	0.975222129640476	0.78475460431387	0.238284983375145	0.907610569499376	0.0247778703595243	0.21524539568613	0.761715016624855	0.0923894305006239
877	N100I	Collaterally Sensitive	Collaterally Neutral	Collaterally Neutral	Collaterally Neutral	0.998423163162563	0.62651798432187	0.814619649700769	0.734595432728401	0.00157683683743712	0.37348201567813	0.185380350299231	0.265404567271599
878	N100P	Collaterally Neutral	Collaterally Sensitive	Collaterally Sensitive	Collaterally Neutral	0.625534807743389	0.990627073581145	0.957243634589774	0.867796841419333	0.374465192256611	0.00937292641885471	0.0427563654102258	0.132203158580667
879	N100Q	Collaterally Sensitive	Collaterally Sensitive	Collaterally Sensitive	Collaterally Neutral	0.956624398883785	0.93101312088137	1	0.729523925880118	0.0433756011162151	0.06898687911863	0	0.270476074119882
880	N100V	Collaterally Neutral	Collaterally Neutral	Collaterally Sensitive	Collaterally Neutral	0.635240194535283	0.762416944074165	1	0.641160058825668	0.364759805464717	0.237583055925835	4.74645138950781e-19	0.358839941174332
881	D101E	Collaterally Neutral	Collaterally Neutral	Collaterally Sensitive	Collaterally Sensitive	0.451856202027992	0.539651285956337	0.929167768799082	0.939785338030031	0.548143797972008	0.460348714043663	0.0708322312009179	0.0602146619699692
882	D101G	Collaterally Neutral	Collaterally Neutral	Collaterally Sensitive	Collaterally Sensitive	0.683757309967932	0.470699367105651	0.979900958966581	1	0.316242690032068	0.529300632894349	0.0200990410334192	4.56045153282235e-231
883	D101K	Collaterally Neutral	Collaterally Neutral	Collaterally Neutral	Collaterally Sensitive	0.668503999054337	0.478766999382336	0.816486410496152	0.98615124341948	0.331496000945663	0.521233000617664	0.183513589503847	0.0138487565805196
884	D101L	Collaterally Neutral	Collaterally Resistant	Collaterally Neutral	Collaterally Sensitive	0.491952847961225	0.0619434796881401	0.790420376075006	0.999983657037269	0.508047152038775	0.93805652031186	0.209579623924994	1.6342962731123e-05
885	D101M	Collaterally Neutral	Collaterally Neutral	Collaterally Sensitive	Collaterally Sensitive	0.413237352803692	0.448799578628836	0.990448131161259	1	0.586762647196308	0.551200421371164	0.00955186883874153	2.12818507345138e-197
886	D101Y	Collaterally Sensitive	Collaterally Neutral	Collaterally Sensitive	Collaterally Sensitive	1	0.275389291252307	0.907562351293072	0.999765811336364	2.42366425377747e-39	0.724610708747693	0.0924376487069282	0.000234188663636407
887	L102A	Collaterally Neutral	Collaterally Neutral	Collaterally Sensitive	Collaterally Sensitive	0.573230166922707	0.546747348542947	0.930800209934735	1	0.426769833077293	0.453252651457053	0.0691997900652652	0
888	L102C	Collaterally Neutral	Collaterally Neutral	Collaterally Sensitive	Collaterally Sensitive	0.481007951988502	0.532656967658373	0.929162331976697	1	0.518992048011498	0.467343032341627	0.0708376680233031	3.09463941353546e-175
889	L102D	Collaterally Sensitive	Collaterally Sensitive	Collaterally Sensitive	Collaterally Sensitive	0.951037703392146	0.999867845965349	0.999131583304615	0.999999999999956	0.0489622966078541	0.000132154034651362	0.000868416695385212	4.44582878779107e-14
890	L102E	Collaterally Neutral	Collaterally Resistant	Collaterally Sensitive	Collaterally Sensitive	0.239032724202724	5.45050520034396e-05	0.999989824519548	1	0.760967275797276	0.999945494947997	1.01754804517441e-05	1.5720675674214e-43
891	L102F	Collaterally Sensitive	Collaterally Neutral	Collaterally Neutral	Collaterally Sensitive	1	0.877317080222419	0.349544907420106	0.999794662582264	3.99038977624579e-20	0.122682919777581	0.650455092579894	0.000205337417735797
892	L102G	Collaterally Neutral	Collaterally Sensitive	Collaterally Sensitive	Collaterally Sensitive	0.684854112709143	0.960280466033258	1	0.999999999314269	0.315145887290857	0.039719533966742	7.35760082848051e-22	6.8573105184928e-10
893	L102K	Collaterally Neutral	Collaterally Neutral	Collaterally Sensitive	Collaterally Sensitive	0.150704676759748	0.605682320175057	0.895213539255077	0.999999997143345	0.849295323240252	0.394317679824944	0.104786460744923	2.85665523092237e-09
894	L102P	Collaterally Neutral	Collaterally Sensitive	Collaterally Sensitive	Collaterally Sensitive	0.712378532802277	0.992995029700435	0.999999994305535	1	0.287621467197723	0.00700497029956496	5.69446530194405e-09	1.1108053510941e-74
895	L102Q	Collaterally Neutral	Collaterally Neutral	Collaterally Neutral	Collaterally Sensitive	0.60148937878764	0.519960043855307	0.784380989922509	0.996515024029481	0.39851062121236	0.480039956144693	0.215619010077491	0.00348497597051853
896	L102R	Collaterally Resistant	Collaterally Resistant	Collaterally Sensitive	Collaterally Sensitive	0.092296580303455	0.0121178104189847	0.981773823994268	0.999999999256287	0.907703419696545	0.987882189581015	0.0182261760057317	7.43712717283017e-10
897	L102S	Collaterally Neutral	Collaterally Neutral	Collaterally Sensitive	Collaterally Sensitive	0.616399285927526	0.532864157648193	0.995916709892441	0.999999999959614	0.383600714072474	0.467135842351807	0.004083290107559	4.03863364468175e-11
898	L102T	Collaterally Neutral	Collaterally Neutral	Collaterally Resistant	Collaterally Sensitive	0.649837917994067	0.683571393038194	0.0486769381892499	1	0.350162082005933	0.316428606961806	0.95132306181075	1.45638610208132e-61
899	V103C	Collaterally Neutral	Collaterally Neutral	Collaterally Neutral	Collaterally Sensitive	0.802876002250668	0.641123696731065	0.852536778412762	0.995090138713557	0.197123997749332	0.358876303268935	0.147463221587238	0.00490986128644302
900	V103F	Collaterally Sensitive	Collaterally Sensitive	Collaterally Neutral	Collaterally Sensitive	1	0.982121401577022	0.798890325559508	0.999999977188274	1.7727489244601e-211	0.0178785984229778	0.201109674440492	2.28117259280627e-08
901	V103L	Collaterally Sensitive	Collaterally Sensitive	Collaterally Sensitive	Collaterally Sensitive	0.999983511202324	0.919233006108446	0.982692915074644	0.929610350165941	1.648879767624e-05	0.0807669938915544	0.0173070849253558	0.0703896498340586
902	V103M	Collaterally Sensitive	Collaterally Neutral	Collaterally Neutral	Collaterally Sensitive	1	0.516745434987338	0.532512517091992	1	1.00265547445264e-19	0.483254565012662	0.467487482908008	1.63884917641642e-20
903	V103W	Collaterally Sensitive	Collaterally Sensitive	Collaterally Sensitive	Collaterally Sensitive	0.999999539264586	0.957442701782048	0.956272816795642	0.999999981168251	4.60735413829138e-07	0.0425572982179522	0.0437271832043581	1.88317494782561e-08
904	E104A	Collaterally Neutral	Collaterally Neutral	Collaterally Neutral	Collaterally Neutral	0.616824834517173	0.725988578917483	0.558295558110686	0.43638304001211	0.383175165482827	0.274011421082517	0.441704441889314	0.56361695998789
905	E104C	Collaterally Neutral	Collaterally Neutral	Collaterally Sensitive	Collaterally Sensitive	0.409781347442737	0.569828318201191	0.996838470313003	0.999999911780115	0.590218652557263	0.430171681798809	0.00316152968699654	8.82198851366302e-08
906	E104F	Collaterally Neutral	Collaterally Neutral	Collaterally Neutral	Collaterally Sensitive	0.59546712083651	0.631754668591277	0.588455405541694	0.999999976443132	0.40453287916349	0.368245331408723	0.411544594458306	2.35568682860148e-08
907	E104H	Collaterally Neutral	Collaterally Sensitive	Collaterally Sensitive	Collaterally Neutral	0.702776623976373	0.999851814342721	0.99979750587236	0.831438620711457	0.297223376023627	0.000148185657279468	0.000202494127639877	0.168561379288543
908	E104I	Collaterally Neutral	Collaterally Neutral	Collaterally Neutral	Collaterally Sensitive	0.772462759134334	0.279432871335261	0.684661382161892	0.925390553351061	0.227537240865666	0.720567128664739	0.315338617838108	0.0746094466489391
909	E104K	Collaterally Neutral	Collaterally Neutral	Collaterally Neutral	Collaterally Sensitive	0.700160987500736	0.385867794389197	0.40310956916853	0.998406413814307	0.299839012499264	0.614132205610803	0.59689043083147	0.00159358618569324
910	E104L	Collaterally Neutral	Collaterally Sensitive	Collaterally Sensitive	Collaterally Neutral	0.598644165632813	0.98011015113344	0.999999999999102	0.797332325667071	0.401355834367187	0.0198898488665596	8.98259355304812e-13	0.202667674332929
911	E104M	Collaterally Sensitive	Collaterally Sensitive	Collaterally Neutral	Collaterally Neutral	0.938146230208045	0.999999640248456	0.847125367778235	0.787350174784854	0.0618537697919554	3.59751543775091e-07	0.152874632221765	0.212649825215146
912	E104N	Collaterally Sensitive	Collaterally Neutral	Collaterally Neutral	Collaterally Neutral	1	0.866576922633556	0.224829910265763	0.806625076994708	5.55606216090157e-45	0.133423077366444	0.775170089734237	0.193374923005292
913	E104P	Collaterally Neutral	Collaterally Neutral	Collaterally Neutral	Collaterally Neutral	0.516719266773943	0.768503924956904	0.637011283225451	0.419757103700423	0.483280733226057	0.231496075043096	0.362988716774549	0.580242896299577
914	E104Q	Collaterally Neutral	Collaterally Sensitive	Collaterally Neutral	Collaterally Neutral	0.577304120229534	0.999999999842915	0.633775486553285	0.66717768105045	0.422695879770466	1.57084646369477e-10	0.366224513446715	0.33282231894955
915	E104R	Collaterally Neutral	Collaterally Sensitive	Collaterally Sensitive	Collaterally Sensitive	0.523677769426336	0.999298083031019	0.900218699258025	0.998728148248928	0.476322230573664	0.000701916968980593	0.0997813007419752	0.00127185175107177
916	E104S	Collaterally Neutral	Collaterally Neutral	Collaterally Neutral	Collaterally Neutral	0.565104495472108	0.527627646839549	0.486696141446741	0.384971624782806	0.434895504527892	0.472372353160451	0.513303858553259	0.615028375217194
917	E104T	Collaterally Sensitive	Collaterally Sensitive	Collaterally Sensitive	Collaterally Neutral	0.99898728690508	0.95733828578261	0.925876733264991	0.581747656360441	0.00101271309491953	0.04266171421739	0.0741232667350094	0.418252343639559
918	E104V	Collaterally Neutral	Collaterally Sensitive	Collaterally Neutral	Collaterally Neutral	0.51689151666035	0.995773906098017	0.867137137296292	0.579565704012911	0.48310848333965	0.00422609390198263	0.132862862703708	0.420434295987089
919	E104W	Collaterally Neutral	Collaterally Sensitive	Collaterally Neutral	Collaterally Sensitive	0.70149556404738	0.999322553171058	0.59812596351971	0.999854735381539	0.29850443595262	0.000677446828941585	0.401874036480289	0.000145264618461122
920	E104Y	Collaterally Resistant	Collaterally Resistant	Collaterally Neutral	Collaterally Neutral	0.0154930933208624	0.05743930700074	0.130850117929111	0.656491945606155	0.984506906679138	0.94256069299926	0.869149882070889	0.343508054393845
921	Y105C	Collaterally Neutral	Collaterally Sensitive	Collaterally Sensitive	Collaterally Sensitive	0.564143929327564	0.932771923955145	1	1	0.435856070672436	0.0672280760448548	0	1.27214255087958e-27
922	Y105T	Collaterally Sensitive	Collaterally Neutral	Collaterally Sensitive	Collaterally Sensitive	0.999999999999989	0.303690128858751	0.892198765807646	1	1.10174045308508e-14	0.696309871141249	0.107801234192354	0
923	Y105W	Collaterally Neutral	Collaterally Neutral	Collaterally Neutral	Collaterally Neutral	0.616832840125894	0.694660740989685	0.487638378815456	0.297532720131425	0.383167159874106	0.305339259010315	0.512361621184544	0.702467279868575
924	S106A	Collaterally Neutral	Collaterally Resistant	Collaterally Neutral	Collaterally Sensitive	0.233805669759748	2.51186375233026e-06	0.60455386500023	0.991923981293301	0.766194330240252	0.999997488136248	0.39544613499977	0.0080760187066994
925	S106C	Collaterally Neutral	Collaterally Neutral	Collaterally Sensitive	Collaterally Sensitive	0.825776820281772	0.760315928771858	0.905223005390608	1	0.174223179718228	0.239684071228142	0.0947769946093916	0
926	S106D	Collaterally Neutral	Collaterally Sensitive	Collaterally Sensitive	Collaterally Sensitive	0.82822356547005	0.959113272461274	0.999999941665115	1	0.17177643452995	0.0408867275387264	5.833488504895e-08	0
927	S106E	Collaterally Sensitive	Collaterally Sensitive	Collaterally Sensitive	Collaterally Sensitive	0.99889174376374	1	1	0.999999670796534	0.00110825623625961	7.01231795903995e-152	2.09769986522069e-29	3.292034656384e-07
928	S106F	Collaterally Neutral	Collaterally Neutral	Collaterally Sensitive	Collaterally Sensitive	0.756988785174903	0.849561858906027	0.999999781380244	1	0.243011214825097	0.150438141093973	2.18619756161168e-07	3.95828095517556e-41
929	S106G	Collaterally Neutral	Collaterally Resistant	Collaterally Neutral	Collaterally Sensitive	0.486375413527965	2.19824158875781e-14	0.716148317950445	1	0.513624586472035	0.999999999999978	0.283851682049555	0
930	S106K	Collaterally Sensitive	Collaterally Sensitive	Collaterally Sensitive	Collaterally Sensitive	0.98954130320619	0.96786903368297	0.999864764929284	0.999999999735386	0.0104586967938102	0.0321309663170297	0.000135235070715867	2.64614012579025e-10
931	S106L	Collaterally Sensitive	Collaterally Sensitive	Collaterally Sensitive	Collaterally Sensitive	0.999999999999979	1	1	0.999999999947572	2.07250033943436e-14	0	1.01772629163326e-159	5.24284361059746e-11
932	S106M	Collaterally Resistant	Collaterally Sensitive	Collaterally Sensitive	Collaterally Sensitive	0.0257217500287688	0.94960376412779	0.999999997599397	1	0.974278249971231	0.0503962358722104	2.40060347354667e-09	0
933	S106N	Collaterally Neutral	Collaterally Sensitive	Collaterally Neutral	Collaterally Sensitive	0.643550482145092	0.983311737493703	0.635426194636393	0.999784569272971	0.356449517854908	0.0166882625062966	0.364573805363607	0.000215430727028932
934	S106P	Collaterally Neutral	Collaterally Sensitive	Collaterally Sensitive	Collaterally Sensitive	0.335286149995342	1	1	1	0.664713850004658	3.48646708282967e-23	0	0
935	S106Q	Collaterally Neutral	Collaterally Sensitive	Collaterally Sensitive	Collaterally Sensitive	0.489818754933325	1	0.999998516057875	1	0.510181245066675	9.96735714320872e-23	1.48394212539791e-06	1.39106841561077e-28
936	S106R	Collaterally Neutral	Collaterally Neutral	Collaterally Sensitive	Collaterally Sensitive	0.475480895049639	0.409590377369149	0.999999995452869	1	0.524519104950361	0.590409622630851	4.54713116111014e-09	0
937	S106T	Collaterally Neutral	Collaterally Neutral	Collaterally Neutral	Collaterally Sensitive	0.481792538747335	0.618575526643524	0.740477086772813	1	0.518207461252665	0.381424473356476	0.259522913227187	2.01876610767187e-163
938	S106V	Collaterally Resistant	Collaterally Neutral	Collaterally Sensitive	Collaterally Sensitive	6.28000759886893e-05	0.14047133615187	0.999995883066638	1	0.999937199924011	0.85952866384813	4.11693336156059e-06	1.30467216603775e-20
939	S106W	Collaterally Sensitive	Collaterally Sensitive	Collaterally Sensitive	Collaterally Sensitive	0.999919869768898	1	1	1	8.01302311015821e-05	2.29815797841011e-37	5.32503454547641e-266	3.97822542236764e-16
940	P107A	Collaterally Neutral	Collaterally Sensitive	Collaterally Sensitive	Collaterally Sensitive	0.37189767227219	0.905960767418194	0.967617650822954	0.999999999971008	0.62810232772781	0.0940392325818059	0.0323823491770463	2.89919292456321e-11
941	P107C	Collaterally Sensitive	Collaterally Sensitive	Collaterally Sensitive	Collaterally Sensitive	0.999994795136846	0.94891674646932	0.999999999994855	0.996621136481973	5.20486315404195e-06	0.0510832535306796	5.14463493965127e-12	0.00337886351802738
942	P107D	Collaterally Neutral	Collaterally Neutral	Collaterally Sensitive	Collaterally Sensitive	0.186749882749484	0.759937254072506	0.950213245979811	0.999799427131242	0.813250117250516	0.240062745927494	0.0497867540201886	0.000200572868758053
943	P107E	Collaterally Neutral	Collaterally Sensitive	Collaterally Neutral	Collaterally Sensitive	0.776663042966585	0.983114392070989	0.769434757545722	1	0.223336957033415	0.0168856079290112	0.230565242454278	3.4076788931655e-45
944	P107F	Collaterally Sensitive	Collaterally Resistant	Collaterally Sensitive	Collaterally Sensitive	0.95711442276997	0.0241812198404088	0.886537757202331	1	0.0428855772300299	0.975818780159591	0.113462242797669	3.70711849485551e-24
945	P107G	Collaterally Neutral	Collaterally Neutral	Collaterally Sensitive	Collaterally Sensitive	0.335470276775498	0.839749591823844	0.945890119492446	0.999999999553307	0.664529723224502	0.160250408176156	0.0541098805075541	4.46693334362051e-10
946	P107H	Collaterally Sensitive	Collaterally Sensitive	Collaterally Sensitive	Collaterally Sensitive	1	0.999668344093714	0.945091163497779	1	3.35017662198038e-23	0.000331655906285734	0.0549088365022208	2.59514196348254e-125
947	P107K	Collaterally Neutral	Collaterally Sensitive	Collaterally Resistant	Collaterally Sensitive	0.451871778433215	0.974000959260566	0.0254605699747584	0.999999075479691	0.548128221566785	0.025999040739434	0.974539430025242	9.24520309349896e-07
948	P107M	Collaterally Neutral	Collaterally Neutral	Collaterally Neutral	Collaterally Sensitive	0.382687441893485	0.36534490455317	0.426794042650846	0.999899620875249	0.617312558106515	0.63465509544683	0.573205957349154	0.000100379124751397
949	P107N	Collaterally Sensitive	Collaterally Sensitive	Collaterally Sensitive	Collaterally Sensitive	0.999065739085329	0.957143071979979	0.95413194183589	1	0.00093426091467087	0.0428569280200207	0.0458680581641097	2.67628488655748e-25
950	P107Q	Collaterally Sensitive	Collaterally Sensitive	Collaterally Neutral	Collaterally Sensitive	0.999828708156441	0.992205619542308	0.676257729238983	1	0.000171291843558536	0.00779438045769212	0.323742270761017	0
951	P107R	Collaterally Neutral	Collaterally Neutral	Collaterally Sensitive	Collaterally Sensitive	0.418300710798995	0.426918452200226	0.999999753257427	1	0.581699289201005	0.573081547799774	2.46742573056676e-07	0
952	P107S	Collaterally Neutral	Collaterally Sensitive	Collaterally Sensitive	Collaterally Sensitive	0.761772422972365	0.962588780886441	0.880240179494299	1	0.238227577027634	0.0374112191135591	0.119759820505701	0
953	P107T	Collaterally Neutral	Collaterally Resistant	Collaterally Neutral	Collaterally Sensitive	0.330419488132189	0	0.29288195072499	0.999954775072664	0.669580511867811	1	0.70711804927501	4.52249273364737e-05
954	P107V	Collaterally Neutral	Collaterally Neutral	Collaterally Neutral	Collaterally Sensitive	0.446633232215694	0.463671893227268	0.216015915787086	1	0.553366767784306	0.536328106772732	0.783984084212914	9.4728558137796e-53
955	P107W	Collaterally Sensitive	Collaterally Neutral	Collaterally Sensitive	Collaterally Sensitive	0.936849305781141	0.207544173694178	0.950633442448845	1	0.0631506942188592	0.792455826305822	0.0493665575511546	0
956	P107Y	Collaterally Neutral	Collaterally Neutral	Collaterally Sensitive	Collaterally Sensitive	0.490028360861	0.151170006634422	0.976241258476991	0.999874634099414	0.509971639139	0.848829993365578	0.0237587415230095	0.000125365900586393
957	V108A	Collaterally Resistant	Collaterally Neutral	Collaterally Resistant	Collaterally Sensitive	0	0.159964538176511	2.53846153830395e-06	0.927372954895506	1	0.840035461823489	0.999997461538462	0.0726270451044938
958	V108C	Collaterally Resistant	Collaterally Resistant	Collaterally Resistant	Collaterally Sensitive	3.56421281377806e-08	1.50919478275613e-05	3.36395747513318e-06	0.924537614192713	0.999999964357872	0.999984908052172	0.999996636042525	0.0754623858072872
959	V108E	Collaterally Resistant	Collaterally Neutral	Collaterally Resistant	Collaterally Neutral	0.00142950505361294	0.735124076137391	0.0046499218883832	0.617461881158712	0.998570494946387	0.264875923862609	0.995350078111617	0.382538118841288
960	V108G	Collaterally Resistant	Collaterally Resistant	Collaterally Neutral	Collaterally Sensitive	9.89092030501126e-10	0.019478760795418	0.159777447173317	1	0.999999999010908	0.980521239204582	0.840222552826683	5.66100717124156e-45
961	V108H	Collaterally Resistant	Collaterally Neutral	Collaterally Resistant	Collaterally Sensitive	2.79641898526251e-09	0.208804067973099	8.32475344436645e-06	0.999966013642841	0.999999997203581	0.791195932026901	0.999991675246556	3.39863571592709e-05
962	V108M	Collaterally Resistant	Collaterally Resistant	Collaterally Resistant	Collaterally Neutral	5.0673909512966e-12	3.26624561697297e-05	4.01349081302627e-07	0.838075930005664	0.999999999994933	0.99996733754383	0.999999598650919	0.161924069994336
963	V108N	Collaterally Resistant	Collaterally Neutral	Collaterally Resistant	Collaterally Sensitive	0.0693172719280458	0.519654061658064	0.00523170986921129	1	0.930682728071954	0.480345938341936	0.994768290130789	4.9759567418408e-16
964	V108R	Collaterally Resistant	Collaterally Resistant	Collaterally Resistant	Collaterally Sensitive	0.0102109309074757	0.108648348576068	0.0014816550221618	1	0.989789069092524	0.891351651423932	0.998518344977838	2.36914561364241e-100
965	V108S	Collaterally Resistant	Collaterally Neutral	Collaterally Resistant	Collaterally Sensitive	3.60973248993979e-05	0.195373590128104	0.060972313770128	0.98513080187483	0.999963902675101	0.804626409871896	0.939027686229872	0.01486919812517
966	V108W	Collaterally Neutral	Collaterally Neutral	Collaterally Neutral	Collaterally Sensitive	0.252787602059534	0.477038327435566	0.460006121169767	0.924116032427653	0.747212397940466	0.522961672564434	0.539993878830233	0.0758839675723475
967	V108Y	Collaterally Neutral	Collaterally Resistant	Collaterally Resistant	Collaterally Sensitive	0.161514633172564	0	0.121183916139814	0.97016296449297	0.838485366827436	1	0.878816083860186	0.0298370355070302
968	T109C	Collaterally Resistant	Collaterally Neutral	Collaterally Neutral	Collaterally Sensitive	0.0380071716689406	0.40348024893087	0.537347256795796	0.88963104270694	0.961992828331059	0.59651975106913	0.462652743204204	0.11036895729306
969	T109D	Collaterally Sensitive	Collaterally Sensitive	Collaterally Sensitive	Collaterally Sensitive	0.999999999706298	0.997375403340444	1	1	2.93702397048445e-10	0.00262459665955605	0	0
970	T109E	Collaterally Sensitive	Collaterally Sensitive	Collaterally Sensitive	Collaterally Sensitive	0.999999946858758	0.999999671627487	1	1	5.31412423447046e-08	3.28372513426794e-07	5.8766638701992e-27	0
971	T109F	Collaterally Resistant	Collaterally Sensitive	Collaterally Sensitive	Collaterally Sensitive	0.0039651375900942	1	0.999965994586115	1	0.996034862409906	0	3.40054138849656e-05	0
972	T109G	Collaterally Neutral	Collaterally Neutral	Collaterally Sensitive	Collaterally Sensitive	0.362782521809614	0.844412960732356	0.896072406238245	1	0.637217478190386	0.155587039267644	0.103927593761755	6.8664403992065e-17
973	T109H	Collaterally Sensitive	Collaterally Sensitive	Collaterally Sensitive	Collaterally Sensitive	1	1	1	0.999999999999823	9.92588514864868e-35	1.19414232951181e-120	3.26832112966023e-21	1.7728281088112e-13
974	T109I	Collaterally Neutral	Collaterally Neutral	Collaterally Sensitive	Collaterally Sensitive	0.214184692989021	0.37056407816866	0.986934781038247	0.999999999999994	0.785815307010979	0.62943592183134	0.0130652189617527	5.73920499597152e-15
975	T109K	Collaterally Sensitive	Collaterally Sensitive	Collaterally Sensitive	Collaterally Sensitive	1	1	1	1	8.90995477477514e-124	3.32595009261121e-260	1.21693770109586e-118	0
976	T109L	Collaterally Resistant	Collaterally Neutral	Collaterally Sensitive	Collaterally Sensitive	4.9249813116603e-09	0.84890889986003	0.999999999880385	0.987885179250219	0.999999995075019	0.15109110013997	1.19614969633207e-10	0.0121148207497812
977	T109M	Collaterally Neutral	Collaterally Sensitive	Collaterally Sensitive	Collaterally Sensitive	0.492242279722607	1	0.975737165194058	0.999968973710107	0.507757720277393	1.44852164696368e-30	0.0242628348059418	3.10262898933497e-05
978	T109N	Collaterally Neutral	Collaterally Neutral	Collaterally Sensitive	Collaterally Sensitive	0.701242993748984	0.800036751878688	1	1	0.298757006251016	0.199963248121313	7.29446111149312e-18	1.66719345759516e-19
979	T109P	Collaterally Sensitive	Collaterally Sensitive	Collaterally Sensitive	Collaterally Sensitive	1	1	1	0.999999999999997	7.98458914851262e-24	0	0	3.21143406772454e-15
980	T109Q	Collaterally Sensitive	Collaterally Sensitive	Collaterally Sensitive	Collaterally Sensitive	0.999999999994156	0.999999999999303	0.99999999998876	1	5.84397284177861e-12	6.9690030010167e-13	1.12401310465792e-11	0
981	T109R	Collaterally Sensitive	Collaterally Sensitive	Collaterally Sensitive	Collaterally Sensitive	1	0.999999999999998	1	1	2.65145895554347e-43	1.88234726305705e-15	1.47818250016587e-50	2.09070288857189e-18
982	T109S	Collaterally Neutral	Collaterally Neutral	Collaterally Sensitive	Collaterally Sensitive	0.80554523867201	0.713545266339461	0.914557625129631	0.922287877182854	0.19445476132799	0.286454733660539	0.0854423748703691	0.0777121228171464
983	T109V	Collaterally Resistant	Collaterally Neutral	Collaterally Sensitive	Collaterally Sensitive	0.000630430988291075	0.583070331500388	0.999761046361224	0.965668906217949	0.999369569011709	0.416929668499612	0.000238953638776375	0.0343310937820512
984	T109Y	Collaterally Neutral	Collaterally Sensitive	Collaterally Sensitive	Collaterally Sensitive	0.815927975310448	0.999997703893815	1	1	0.184072024689552	2.29610618453882e-06	0	1.38570108070746e-22
985	E110A	Collaterally Resistant	Collaterally Resistant	Collaterally Resistant	Collaterally Resistant	0.00280006957240997	0.00129515176968165	0.121845110832283	0.000762073265468288	0.99719993042759	0.998704848230318	0.878154889167717	0.999237926734532
986	E110C	Collaterally Resistant	Collaterally Neutral	Collaterally Neutral	Collaterally Sensitive	0.00196277303721404	0.143165150022818	0.283735977722834	1	0.998037226962786	0.856834849977182	0.716264022277166	1.30515267838295e-105
987	E110D	Collaterally Neutral	Collaterally Neutral	Collaterally Neutral	Collaterally Neutral	0.197873241703706	0.251297937441305	0.341309511873332	0.439248898534185	0.802126758296294	0.748702062558695	0.658690488126668	0.560751101465815
988	E110F	Collaterally Neutral	Collaterally Neutral	Collaterally Neutral	Collaterally Sensitive	0.238600213762859	0.322400765027702	0.401192186693296	0.975807525645899	0.761399786237141	0.677599234972298	0.598807813306704	0.0241924743541011
989	E110H	Collaterally Resistant	Collaterally Resistant	Collaterally Neutral	Collaterally Sensitive	0.000164102236818509	3.49464901461261e-12	0.333743585477255	0.906248168873647	0.999835897763181	0.999999999996505	0.666256414522745	0.0937518311263529
990	E110L	Collaterally Neutral	Collaterally Neutral	Collaterally Neutral	Collaterally Sensitive	0.135917291757316	0.366012456954359	0.464281390529558	0.985911804498386	0.864082708242684	0.633987543045641	0.535718609470442	0.0140881955016143
991	E110M	Collaterally Neutral	Collaterally Resistant	Collaterally Neutral	Collaterally Neutral	0.245259894570437	0	0.466269435675015	0.293849520402137	0.754740105429563	1	0.533730564324985	0.706150479597863
992	E110R	Collaterally Resistant	Collaterally Resistant	Collaterally Neutral	Collaterally Neutral	0.0318955579748101	0.0339785550869578	0.320515289499957	0.862919567712946	0.96810444202519	0.966021444913042	0.679484710500043	0.137080432287054
993	E110T	Collaterally Neutral	Collaterally Resistant	Collaterally Neutral	Collaterally Neutral	0.189300797195442	0	0.462860916961022	0.855573315826959	0.810699202804558	1	0.537139083038978	0.144426684173041
994	E110W	Collaterally Neutral	Collaterally Resistant	Collaterally Neutral	Collaterally Sensitive	0.282322672054911	5.67446339849731e-06	0.275903917193131	1	0.717677327945089	0.999994325536602	0.724096082806869	3.23886296989548e-19
995	E110Y	Collaterally Sensitive	Collaterally Resistant	Collaterally Neutral	Collaterally Sensitive	0.999999890512598	0.0256822119357085	0.573007373919442	0.945937698614303	1.09487401946647e-07	0.974317788064291	0.426992626080558	0.0540623013856966
996	K111A	Collaterally Neutral	Collaterally Neutral	Collaterally Neutral	Collaterally Neutral	0.308936623091171	0.142257352680655	0.366410540498038	0.326125208753247	0.691063376908829	0.857742647319345	0.633589459501962	0.673874791246753
997	K111C	Collaterally Neutral	Collaterally Neutral	Collaterally Neutral	Collaterally Sensitive	0.144520173017801	0.488447689228112	0.215328072364206	0.974563397530308	0.855479826982199	0.511552310771888	0.784671927635794	0.025436602469692
998	K111D	Collaterally Neutral	Collaterally Neutral	Collaterally Neutral	Collaterally Neutral	0.43126792845794	0.44458123257546	0.572844185015632	0.736048616535269	0.56873207154206	0.55541876742454	0.427155814984368	0.263951383464731
999	K111E	Collaterally Neutral	Collaterally Neutral	Collaterally Neutral	Collaterally Sensitive	0.511544213166991	0.373563062427669	0.569408973566841	0.94058785213893	0.488455786833009	0.626436937572331	0.430591026433159	0.05941214786107
1000	K111F	Collaterally Neutral	Collaterally Resistant	Collaterally Neutral	Collaterally Sensitive	0.200985062419284	0.0481286628260946	0.321046383469126	0.994234403558393	0.799014937580716	0.951871337173905	0.678953616530874	0.00576559644160674
1001	K111G	Collaterally Neutral	Collaterally Neutral	Collaterally Neutral	Collaterally Neutral	0.314064194190341	0.157285111709831	0.450185448761409	0.581588185463727	0.685935805809659	0.842714888290169	0.549814551238591	0.418411814536273
1002	K111H	Collaterally Neutral	Collaterally Neutral	Collaterally Sensitive	Collaterally Sensitive	0.365056487239346	0.144103573834313	0.993866735520487	0.987406834018148	0.634943512760654	0.855896426165687	0.00613326447951289	0.0125931659818515
1003	K111I	Collaterally Sensitive	Collaterally Neutral	Collaterally Neutral	Collaterally Sensitive	1	0.259625703379355	0.612580153938014	0.991086003876848	2.26231317083702e-274	0.740374296620645	0.387419846061986	0.00891399612315207
1004	K111L	Collaterally Neutral	Collaterally Resistant	Collaterally Neutral	Collaterally Neutral	0.190567717568615	0	0.225363778825244	0.28089017230308	0.809432282431385	1	0.774636221174756	0.71910982769692
1005	K111M	Collaterally Neutral	Collaterally Neutral	Collaterally Neutral	Collaterally Neutral	0.311563888178102	0.304641297936086	0.32727484787184	0.174623344010782	0.688436111821898	0.695358702063914	0.67272515212816	0.825376655989218
1006	K111N	Collaterally Resistant	Collaterally Neutral	Collaterally Neutral	Collaterally Neutral	0.0409941307128856	0.322561329522121	0.134937341853731	0.229806888181459	0.959005869287114	0.677438670477879	0.865062658146269	0.770193111818541
1007	K111P	Collaterally Neutral	Collaterally Neutral	Collaterally Neutral	Collaterally Sensitive	0.354911432541112	0.184523748999639	0.475817110310652	0.996100862188842	0.645088567458888	0.815476251000361	0.524182889689348	0.00389913781115807
1008	K111Q	Collaterally Neutral	Collaterally Neutral	Collaterally Neutral	Collaterally Neutral	0.233641950476804	0.257719696686397	0.219961952043622	0.245357399497162	0.766358049523196	0.742280303313603	0.780038047956378	0.754642600502838
1009	K111R	Collaterally Neutral	Collaterally Resistant	Collaterally Neutral	Collaterally Neutral	0.349343168213742	0.011819900604459	0.340928173180885	0.449577546862604	0.650656831786258	0.988180099395541	0.659071826819115	0.550422453137396
1010	K111S	Collaterally Neutral	Collaterally Neutral	Collaterally Neutral	Collaterally Neutral	0.43839931819435	0.137999845359199	0.403044492172383	0.737305620879425	0.56160068180565	0.862000154640801	0.596955507827617	0.262694379120575
1011	K111T	Collaterally Neutral	Collaterally Resistant	Collaterally Neutral	Collaterally Neutral	0.297593395555855	0.0584496855942213	0.251643153396002	0.472374118409219	0.702406604444145	0.941550314405779	0.748356846603998	0.527625881590781
1012	K111V	Collaterally Neutral	Collaterally Neutral	Collaterally Neutral	Collaterally Neutral	0.459310053110703	0.597547739263192	0.489843725561483	0.812344067721132	0.540689946889297	0.402452260736808	0.510156274438517	0.187655932278868
1013	K111W	Collaterally Neutral	Collaterally Resistant	Collaterally Neutral	Collaterally Sensitive	0.208841009913595	0.0324280646676373	0.380298408356667	1	0.791158990086405	0.967571935332363	0.619701591643333	1.15233637113175e-107
1014	K111Y	Collaterally Neutral	Collaterally Resistant	Collaterally Neutral	Collaterally Sensitive	0.233440975164757	0.0105951656791244	0.28676978578482	0.981903129273871	0.766559024835243	0.989404834320876	0.71323021421518	0.0180968707261285
1015	H112A	Collaterally Resistant	Collaterally Resistant	Collaterally Neutral	Collaterally Sensitive	6.0206073808633e-05	0.092598741458488	0.276818043554288	0.999634940822884	0.999939793926191	0.907401258541512	0.723181956445712	0.000365059177116358
1016	H112C	Collaterally Neutral	Collaterally Neutral	Collaterally Neutral	Collaterally Sensitive	0.497763079613083	0.489150455208132	0.49252302792275	0.986774344385757	0.502236920386917	0.510849544791868	0.50747697207725	0.0132256556142427
1017	H112D	Collaterally Neutral	Collaterally Resistant	Collaterally Sensitive	Collaterally Sensitive	0.144127651360005	0.0681601851662724	0.953201066637991	1	0.855872348639995	0.931839814833728	0.0467989333620092	0
1018	H112E	Collaterally Neutral	Collaterally Neutral	Collaterally Neutral	Collaterally Sensitive	0.219411307874152	0.271910524272172	0.292689297454737	0.99999999999999	0.780588692125848	0.728089475727828	0.707310702545263	1.02865566440476e-14
1019	H112G	Collaterally Resistant	Collaterally Resistant	Collaterally Resistant	Collaterally Sensitive	0.0801046424181796	0.0074917253326674	0.0995960474176818	0.999999999999979	0.91989535758182	0.992508274667333	0.900403952582318	2.06848399827481e-14
1020	H112I	Collaterally Sensitive	Collaterally Sensitive	Collaterally Sensitive	Collaterally Sensitive	0.999912253633847	0.956979758285886	0.957682918259427	0.999394074535299	8.77463661535263e-05	0.0430202417141142	0.0423170817405727	0.000605925464700504
1021	H112L	Collaterally Resistant	Collaterally Neutral	Collaterally Neutral	Collaterally Sensitive	0.0166445390102525	0.564546849040558	0.329587257881302	0.999734450552491	0.983355460989747	0.435453150959442	0.670412742118698	0.000265549447509138
1022	H112M	Collaterally Neutral	Collaterally Neutral	Collaterally Neutral	Collaterally Sensitive	0.765770080859945	0.406572276069264	0.504843954347837	0.997136205123926	0.234229919140055	0.593427723930736	0.495156045652163	0.00286379487607391
1023	H112N	Collaterally Neutral	Collaterally Neutral	Collaterally Neutral	Collaterally Neutral	0.586540656369099	0.839400411495067	0.522320238906642	0.838799909903513	0.413459343630901	0.160599588504933	0.477679761093358	0.161200090096487
1024	H112P	Collaterally Resistant	Collaterally Resistant	Collaterally Sensitive	Collaterally Sensitive	0.0576024547821167	1.41701238520753e-07	0.999999999640647	1	0.942397545217883	0.999999858298761	3.59352597862785e-10	1.68851103172778e-44
1025	H112Q	Collaterally Resistant	Collaterally Sensitive	Collaterally Neutral	Collaterally Sensitive	0	0.986444725687461	0.565343082244486	0.999680891095451	1	0.0135552743125394	0.434656917755514	0.000319108904549455
1026	H112R	Collaterally Resistant	Collaterally Resistant	Collaterally Neutral	Collaterally Sensitive	0.0467600250425296	0	0.136240885259911	0.930732187040157	0.95323997495747	1	0.863759114740089	0.0692678129598429
1027	H112S	Collaterally Resistant	Collaterally Resistant	Collaterally Neutral	Collaterally Sensitive	0.0846429093458684	0.122301815825591	0.197447498141828	0.999862017001568	0.915357090654132	0.877698184174409	0.802552501858172	0.000137982998432234
1028	H112T	Collaterally Resistant	Collaterally Resistant	Collaterally Resistant	Collaterally Sensitive	0.0604953009710669	0.0919015906951167	0.00283225050536773	1	0.939504699028933	0.908098409304883	0.997167749494632	0
1029	H112V	Collaterally Neutral	Collaterally Neutral	Collaterally Resistant	Collaterally Sensitive	0.187720927798457	0.637328207317416	0.0581122902540395	1	0.812279072201543	0.362671792682584	0.94188770974596	6.29528536058978e-17
1030	H112W	Collaterally Resistant	Collaterally Neutral	Collaterally Resistant	Collaterally Sensitive	0.000323209468073071	0.454767928552865	2.03818782962273e-08	0.994579095190098	0.999676790531927	0.545232071447135	0.999999979618122	0.00542090480990238
1031	H112Y	Collaterally Neutral	Collaterally Resistant	Collaterally Neutral	Collaterally Resistant	0.129393221327047	0.00574885655954882	0.132641224516985	0.078796022264924	0.870606778672953	0.994251143440451	0.867358775483015	0.921203977735076
1032	L113C	Collaterally Neutral	Collaterally Neutral	Collaterally Sensitive	Collaterally Sensitive	0.663660035532811	0.829158461452218	0.985214288090189	0.977520626107093	0.336339964467189	0.170841538547782	0.0147857119098115	0.0224793738929068
1033	L113D	Collaterally Neutral	Collaterally Neutral	Collaterally Neutral	Collaterally Sensitive	0.787584571545524	0.568523983602567	0.542944234208181	0.993616951343332	0.212415428454476	0.431476016397433	0.457055765791819	0.00638304865666767
1034	L113E	Collaterally Neutral	Collaterally Neutral	Collaterally Sensitive	Collaterally Sensitive	0.755961772890245	0.717019147312154	0.888708556543275	0.999500777863757	0.244038227109755	0.282980852687846	0.111291443456725	0.000499222136242956
1035	L113F	Collaterally Neutral	Collaterally Neutral	Collaterally Sensitive	Collaterally Neutral	0.605369052777862	0.703796297455512	0.940874519206773	0.822600336762828	0.394630947222138	0.296203702544488	0.0591254807932273	0.177399663237172
1036	L113G	Collaterally Neutral	Collaterally Neutral	Collaterally Neutral	Collaterally Sensitive	0.797535498627449	0.59825834656923	0.723933321271485	1	0.202464501372551	0.40174165343077	0.276066678728515	9.2681154304e-38
1037	L113H	Collaterally Neutral	Collaterally Neutral	Collaterally Neutral	Collaterally Sensitive	0.630320498562975	0.583836248099106	0.660699429891156	0.961813047492043	0.369679501437025	0.416163751900894	0.339300570108844	0.0381869525079572
1038	L113I	Collaterally Neutral	Collaterally Neutral	Collaterally Neutral	Collaterally Neutral	0.383834420103056	0.608815240627559	0.501134223536613	0.130948297454062	0.616165579896944	0.391184759372441	0.498865776463387	0.869051702545938
1039	L113K	Collaterally Neutral	Collaterally Sensitive	Collaterally Sensitive	Collaterally Sensitive	0.745551773306459	0.98467973688696	0.94105458998802	0.970054168217277	0.254448226693541	0.0153202631130403	0.0589454100119799	0.0299458317827234
1040	L113M	Collaterally Sensitive	Collaterally Neutral	Collaterally Neutral	Collaterally Neutral	0.896705186386211	0.716551629829227	0.765014922311347	0.584261060469388	0.103294813613789	0.283448370170773	0.234985077688653	0.415738939530612
1041	L113P	Collaterally Sensitive	Collaterally Neutral	Collaterally Sensitive	Collaterally Sensitive	0.978493118309077	0.640255312606391	0.998491584471149	0.999230492659367	0.0215068816909226	0.359744687393609	0.00150841552885078	0.000769507340633339
1042	L113Q	Collaterally Neutral	Collaterally Neutral	Collaterally Neutral	Collaterally Sensitive	0.822863556935315	0.503288295676393	0.81833717619751	0.986921689927797	0.177136443064685	0.496711704323607	0.18166282380249	0.0130783100722027
1043	L113R	Collaterally Neutral	Collaterally Neutral	Collaterally Neutral	Collaterally Sensitive	0.797025328907104	0.653694594077902	0.749866565203454	0.995706791053055	0.202974671092896	0.346305405922098	0.250133434796546	0.00429320894694545
1044	L113S	Collaterally Sensitive	Collaterally Neutral	Collaterally Neutral	Collaterally Sensitive	0.999528924999717	0.860434480397279	0.859713060276455	0.999999999999123	0.00047107500028274	0.139565519602721	0.140286939723545	8.77144142329532e-13
1045	L113T	Collaterally Neutral	Collaterally Sensitive	Collaterally Sensitive	Collaterally Sensitive	0.862960727921633	1	0.997806561347303	0.89858849451675	0.137039272078367	1.74706347912617e-18	0.00219343865269734	0.10141150548325
1046	L113W	Collaterally Neutral	Collaterally Neutral	Collaterally Sensitive	Collaterally Sensitive	0.664939265298753	0.724847997578258	1	0.969542495131293	0.335060734701247	0.275152002421742	3.47462011527108e-42	0.0304575048687075
1047	L113Y	Collaterally Sensitive	Collaterally Neutral	Collaterally Neutral	Collaterally Neutral	0.974519335758664	0.530257704581551	0.640353310775528	0.838346132162176	0.0254806642413358	0.469742295418449	0.359646689224472	0.161653867837824
1048	T114A	Collaterally Resistant	Collaterally Neutral	Collaterally Resistant	Collaterally Resistant	0.070553960187533	0.430973885808901	6.52811138479592e-14	0	0.929446039812467	0.569026114191099	0.999999999999935	1
1049	T114C	Collaterally Resistant	Collaterally Neutral	Collaterally Neutral	Collaterally Sensitive	0.117791436761452	0.718429355348297	0.865704908041774	1	0.882208563238548	0.281570644651703	0.134295091958226	0
1050	T114D	Collaterally Neutral	Collaterally Sensitive	Collaterally Neutral	Collaterally Neutral	0.240736851168966	0.965407956170623	0.508413291657919	0.431435961056762	0.759263148831034	0.034592043829377	0.491586708342081	0.568564038943238
1051	T114E	Collaterally Resistant	Collaterally Resistant	Collaterally Resistant	Collaterally Resistant	0.0414112545374887	1.73194791841524e-14	0	0.0302103085712756	0.958588745462511	0.999999999999983	1	0.969789691428724
1052	T114G	Collaterally Resistant	Collaterally Neutral	Collaterally Resistant	Collaterally Resistant	0	0.159710670722256	3.32653914303371e-07	0.117520295259078	1	0.840289329277744	0.999999667346086	0.882479704740922
1053	T114H	Collaterally Neutral	Collaterally Neutral	Collaterally Resistant	Collaterally Neutral	0.579094113998367	0.458331007228227	0.0186155618296573	0.198344091257294	0.420905886001633	0.541668992771773	0.981384438170343	0.801655908742706
1054	T114I	Collaterally Resistant	Collaterally Neutral	Collaterally Neutral	Collaterally Resistant	0.0102032090601712	0.163650811727856	0.169721210816211	0.00548229112740328	0.989796790939829	0.836349188272144	0.830278789183789	0.994517708872597
1055	T114K	Collaterally Neutral	Collaterally Resistant	Collaterally Resistant	Collaterally Resistant	0.177979348649186	0	0.023672121726185	4.376942489559e-07	0.822020651350814	1	0.976327878273815	0.999999562305751
1056	T114L	Collaterally Neutral	Collaterally Neutral	Collaterally Resistant	Collaterally Resistant	0.318557237852511	0.277176991010367	0.00391471224464679	0	0.681442762147489	0.722823008989633	0.996085287755353	1
1057	T114M	Collaterally Resistant	Collaterally Neutral	Collaterally Resistant	Collaterally Resistant	0.000287576645011001	0.191259818988739	0.066941754033871	0.00066128408219035	0.999712423354989	0.808740181011261	0.933058245966129	0.99933871591781
1058	T114N	Collaterally Resistant	Collaterally Resistant	Collaterally Resistant	Collaterally Neutral	0.00782951054661607	0	0.00236252208980048	0.316073147095378	0.992170489453384	1	0.9976374779102	0.683926852904622
1059	T114P	Collaterally Neutral	Collaterally Neutral	Collaterally Resistant	Collaterally Neutral	0.370244030940748	0.266972497557717	0.000235824086297409	0.716788201897211	0.629755969059252	0.733027502442283	0.999764175913703	0.283211798102789
1060	T114Q	Collaterally Sensitive	Collaterally Neutral	Collaterally Neutral	Collaterally Sensitive	1	0.85178185755969	0.425439895582741	0.999999975902536	2.44044234920259e-34	0.14821814244031	0.574560104417259	2.40974643869854e-08
1061	T114R	Collaterally Resistant	Collaterally Resistant	Collaterally Neutral	Collaterally Neutral	0.10353228982916	0.0530725884777358	0.184057354061509	0.384798817442909	0.89646771017084	0.946927411522264	0.815942645938491	0.615201182557091
1062	T114S	Collaterally Resistant	Collaterally Neutral	Collaterally Neutral	Collaterally Neutral	0.0935855608007842	0.347036541456238	0.175215968828037	0.324545334347405	0.906414439199216	0.652963458543762	0.824784031171963	0.675454665652595
1063	T114V	Collaterally Neutral	Collaterally Neutral	Collaterally Resistant	Collaterally Neutral	0.224379754117731	0.193914824251826	0.00968640341280425	0.490593857059269	0.775620245882269	0.806085175748174	0.990313596587196	0.509406142940731
1064	T114W	Collaterally Resistant	Collaterally Resistant	Collaterally Resistant	Collaterally Neutral	0.118866424504315	0.0214709071017789	0.0764956318920996	0.409845975712957	0.881133575495685	0.978529092898221	0.9235043681079	0.590154024287043
1065	T114Y	Collaterally Neutral	Collaterally Neutral	Collaterally Neutral	Collaterally Resistant	0.383427040833763	0.398784019854071	0.458867017783932	0.0165731008696025	0.616572959166237	0.601215980145929	0.541132982216068	0.983426899130397
1066	D115C	Collaterally Sensitive	Collaterally Neutral	Collaterally Neutral	Collaterally Sensitive	0.983347224978018	0.588122632882022	0.759732637420013	0.999985364402615	0.0166527750219821	0.411877367117978	0.240267362579987	1.46355973845779e-05
1067	D115E	Collaterally Neutral	Collaterally Neutral	Collaterally Resistant	Collaterally Neutral	0.864176358924043	0.52006972069135	0.00386545825056672	0.652860411498805	0.135823641075957	0.47993027930865	0.996134541749433	0.347139588501195
1068	D115F	Collaterally Sensitive	Collaterally Neutral	Collaterally Neutral	Collaterally Sensitive	0.999999999999999	0.558467068845333	0.655007946563766	0.999997190228851	1.10759535899589e-15	0.441532931154667	0.344992053436234	2.80977114919973e-06
1069	D115G	Collaterally Sensitive	Collaterally Neutral	Collaterally Neutral	Collaterally Sensitive	0.99268635099137	0.582446779178551	0.87737126367833	0.993590150169819	0.0073136490086295	0.417553220821449	0.12262873632167	0.00640984983018063
1070	D115I	Collaterally Neutral	Collaterally Neutral	Collaterally Resistant	Collaterally Sensitive	0.871694445138368	0.487352836700238	0.000350570576639453	0.995703135847362	0.128305554861632	0.512647163299762	0.999649429423361	0.00429686415263837
1071	D115K	Collaterally Neutral	Collaterally Sensitive	Collaterally Neutral	Collaterally Sensitive	0.781097337676374	0.905584077276063	0.332809471328403	0.999562511907292	0.218902662323626	0.0944159227239372	0.667190528671597	0.00043748809270798
1072	D115L	Collaterally Sensitive	Collaterally Neutral	Collaterally Neutral	Collaterally Sensitive	0.992456528684013	0.713921246709921	0.634000745404484	0.999999948582596	0.00754347131598732	0.286078753290079	0.365999254595516	5.14174036988267e-08
1073	D115N	Collaterally Sensitive	Collaterally Sensitive	Collaterally Neutral	Collaterally Sensitive	0.895291664130539	0.962500967956293	0.653692878563418	0.999999999962955	0.104708335869461	0.0374990320437068	0.346307121436582	3.70452314625184e-11
1074	D115P	Collaterally Sensitive	Collaterally Neutral	Collaterally Neutral	Collaterally Sensitive	0.999999999999999	0.658125219331465	0.809615355526288	0.999999998809432	5.66167153357198e-16	0.341874780668535	0.190384644473712	1.19056838445186e-09
1075	D115Q	Collaterally Sensitive	Collaterally Neutral	Collaterally Sensitive	Collaterally Neutral	0.995476437054849	0.742210501699303	0.948629642914518	0.590808774110024	0.00452356294515068	0.257789498300697	0.051370357085482	0.409191225889976
1076	D115R	Collaterally Sensitive	Collaterally Neutral	Collaterally Neutral	Collaterally Sensitive	0.900442377235429	0.841217364658259	0.863235653585437	1	0.0995576227645712	0.158782635341741	0.136764346414563	2.50538073561519e-93
1077	D115T	Collaterally Sensitive	Collaterally Neutral	Collaterally Neutral	Collaterally Neutral	0.97577650993096	0.581157489856072	0.6373851507208	0.303815820305483	0.0242234900690402	0.418842510143928	0.3626148492792	0.696184179694517
1078	D115V	Collaterally Sensitive	Collaterally Neutral	Collaterally Neutral	Collaterally Neutral	0.994527396495181	0.682837191787177	0.813197649162372	0.71467386537978	0.00547260350481856	0.317162808212823	0.186802350837628	0.28532613462022
1079	D115W	Collaterally Sensitive	Collaterally Neutral	Collaterally Sensitive	Collaterally Sensitive	0.995266243938169	0.768718612822408	0.915034096287414	1	0.00473375606183145	0.231281387177592	0.0849659037125856	3.46809485777499e-175
1080	D115Y	Collaterally Neutral	Collaterally Neutral	Collaterally Neutral	Collaterally Sensitive	0.766027462516135	0.391216747672716	0.420128106725494	0.999934986068682	0.233972537483865	0.608783252327284	0.579871893274506	6.50139313184466e-05
1081	G116K	Collaterally Neutral	Collaterally Sensitive	Collaterally Sensitive	Collaterally Sensitive	0.545323837356204	0.983975299081668	0.999792778656756	0.972161388988142	0.454676162643796	0.0160247009183318	0.000207221343244181	0.0278386110118579
1082	G116V	Collaterally Neutral	Collaterally Sensitive	Collaterally Sensitive	Collaterally Sensitive	0.714608137394656	0.999999999999794	1	0.99999999999766	0.285391862605344	2.05793333855416e-13	0	2.33986596814882e-12
1083	M117A	Collaterally Sensitive	Collaterally Sensitive	Collaterally Neutral	Collaterally Sensitive	0.93444335038311	0.998083596007873	0.586056308755402	0.999999999999653	0.0655566496168905	0.00191640399212679	0.413943691244598	3.47136796974143e-13
1084	M117C	Collaterally Sensitive	Collaterally Neutral	Collaterally Sensitive	Collaterally Sensitive	0.999468275506519	0.784385391956019	0.977609419732674	0.996853893293968	0.000531724493480593	0.215614608043981	0.0223905802673263	0.00314610670603235
1085	M117E	Collaterally Neutral	Collaterally Neutral	Collaterally Sensitive	Collaterally Sensitive	0.757025238768089	0.81847582384855	0.999998207220088	1	0.242974761231911	0.18152417615145	1.79277991160493e-06	1.26788328011165e-16
1086	M117G	Collaterally Sensitive	Collaterally Sensitive	Collaterally Sensitive	Collaterally Sensitive	0.994545636662029	0.983254978283234	1	0.999999999993614	0.00545436333797054	0.016745021716766	4.09762712467047e-89	6.3856726618625e-12
1087	M117H	Collaterally Sensitive	Collaterally Sensitive	Collaterally Sensitive	Collaterally Sensitive	0.997120713282507	1	1	0.999995617318084	0.00287928671749318	7.73547430260795e-35	1.42219175907154e-35	4.38268191579754e-06
1088	M117K	Collaterally Sensitive	Collaterally Sensitive	Collaterally Sensitive	Collaterally Sensitive	0.999993974517359	0.989942931951211	0.987405225649755	1	6.0254826411404e-06	0.0100570680487893	0.0125947743502452	0
1089	M117L	Collaterally Sensitive	Collaterally Neutral	Collaterally Sensitive	Collaterally Sensitive	0.988953756069354	0.85050456928498	0.999999876814348	0.996760822442711	0.0110462439306456	0.14949543071502	1.23185651530136e-07	0.00323917755728913
1090	M117N	Collaterally Sensitive	Collaterally Sensitive	Collaterally Sensitive	Collaterally Sensitive	0.999999966394189	0.982487697681103	1	1	3.36058107937505e-08	0.0175123023188971	6.54485465012745e-101	3.05280894554431e-60
1091	M117P	Collaterally Sensitive	Collaterally Sensitive	Collaterally Sensitive	Collaterally Sensitive	0.992334398912022	1	1	0.999999999644034	0.00766560108797804	2.25282610588596e-124	1.16369706397488e-47	3.55965838997308e-10
1092	M117Q	Collaterally Neutral	Collaterally Neutral	Collaterally Sensitive	Collaterally Sensitive	0.809691763784446	0.603528334942721	0.936695020765234	0.994832339674171	0.190308236215554	0.396471665057279	0.0633049792347661	0.00516766032582866
1093	M117R	Collaterally Sensitive	Collaterally Sensitive	Collaterally Sensitive	Collaterally Sensitive	0.951226535050023	0.999998549861713	0.928196298972313	0.999999999944827	0.0487734649499768	1.45013828682242e-06	0.0718037010276869	5.51731238092128e-11
1094	M117S	Collaterally Sensitive	Collaterally Neutral	Collaterally Sensitive	Collaterally Sensitive	0.946908494605327	0.694355779700978	0.915561257541178	0.99999996355328	0.053091505394673	0.305644220299022	0.0844387424588222	3.64467199749093e-08
1095	M117T	Collaterally Sensitive	Collaterally Neutral	Collaterally Sensitive	Collaterally Sensitive	0.989801778391161	0.684563760873764	0.995436827368354	1	0.0101982216088393	0.315436239126236	0.00456317263164634	0
1096	M117V	Collaterally Sensitive	Collaterally Sensitive	Collaterally Sensitive	Collaterally Sensitive	0.889463957302135	1	0.940939223344173	1	0.110536042697865	1.20500393411891e-24	0.0590607766558274	3.7854450679341e-38
1097	M117W	Collaterally Sensitive	Collaterally Sensitive	Collaterally Sensitive	Collaterally Sensitive	0.901015331837722	1	0.999999966520103	1	0.0989846681622785	1.09381944178175e-102	3.34798973495725e-08	5.92516805129026e-25
1098	M117Y	Collaterally Sensitive	Collaterally Neutral	Collaterally Sensitive	Collaterally Sensitive	0.956808073506173	0.414050195664124	0.999737199322774	1	0.0431919264938269	0.585949804335876	0.000262800677226051	5.91998372947409e-70
1099	T118A	Collaterally Neutral	Collaterally Sensitive	Collaterally Neutral	Collaterally Sensitive	0.538578866127757	0.976681927521422	0.509974991986797	0.998215516437955	0.461421133872243	0.0233180724785779	0.490025008013203	0.00178448356204455
1100	T118C	Collaterally Neutral	Collaterally Neutral	Collaterally Neutral	Collaterally Sensitive	0.433079572284562	0.765376028195448	0.557591951652678	1	0.566920427715438	0.234623971804552	0.442408048347322	1.71085625450832e-22
1101	T118D	Collaterally Neutral	Collaterally Resistant	Collaterally Neutral	Collaterally Sensitive	0.631229585144258	0.057890080429064	0.763860922875778	0.996951950043092	0.368770414855742	0.942109919570936	0.236139077124222	0.00304804995690791
1102	T118E	Collaterally Resistant	Collaterally Resistant	Collaterally Resistant	Collaterally Neutral	0.00717042470825036	1.37143629785896e-11	0.0657999246562956	0.543650903139959	0.99282957529175	0.999999999986286	0.934200075343704	0.456349096860041
1103	T118F	Collaterally Neutral	Collaterally Neutral	Collaterally Sensitive	Collaterally Sensitive	0.566666666462066	0.421177544945444	0.915142658238965	0.999999999999953	0.433333333537934	0.578822455054556	0.0848573417610348	4.70932528782467e-14
1104	T118G	Collaterally Neutral	Collaterally Sensitive	Collaterally Sensitive	Collaterally Sensitive	0.474769756743044	0.98424475888458	0.998073587656283	0.999999534968707	0.525230243256956	0.0157552411154203	0.00192641234371742	4.65031293178099e-07
1105	T118H	Collaterally Neutral	Collaterally Resistant	Collaterally Sensitive	Collaterally Sensitive	0.767609065460794	1.29896093881143e-14	0.975459398933521	1	0.232390934539206	0.999999999999987	0.024540601066479	0
1106	T118I	Collaterally Neutral	Collaterally Sensitive	Collaterally Neutral	Collaterally Sensitive	0.77915471033611	1	0.690863509542352	1	0.22084528966389	0	0.309136490457648	0
1107	T118K	Collaterally Neutral	Collaterally Sensitive	Collaterally Neutral	Collaterally Sensitive	0.610799712920661	0.906002426876997	0.446402020557824	1	0.389200287079339	0.093997573123003	0.553597979442176	3.38832639253277e-17
1108	T118L	Collaterally Neutral	Collaterally Resistant	Collaterally Neutral	Collaterally Sensitive	0.369598403358346	0.0835360240579028	0.336891723800833	0.999668204378531	0.630401596641654	0.916463975942097	0.663108276199167	0.000331795621468969
1109	T118M	Collaterally Neutral	Collaterally Neutral	Collaterally Neutral	Collaterally Sensitive	0.48741137462674	0.684053960439634	0.20040131932656	0.99919847622551	0.51258862537326	0.315946039560366	0.79959868067344	0.000801523774489931
1110	T118N	Collaterally Neutral	Collaterally Resistant	Collaterally Neutral	Collaterally Sensitive	0.403055138242253	0	0.311173843025295	0.986662431627405	0.596944861757747	1	0.688826156974705	0.0133375683725948
1111	T118P	Collaterally Neutral	Collaterally Neutral	Collaterally Neutral	Collaterally Sensitive	0.661638251218285	0.389608485610434	0.460546760891046	0.999999999999593	0.338361748781715	0.610391514389566	0.539453239108954	4.06591980107024e-13
1112	T118Q	Collaterally Neutral	Collaterally Neutral	Collaterally Neutral	Collaterally Sensitive	0.567609205832675	0.513563004824188	0.275348219394591	0.983065909744973	0.432390794167325	0.486436995175812	0.724651780605409	0.0169340902550272
1113	T118R	Collaterally Neutral	Collaterally Sensitive	Collaterally Neutral	Collaterally Sensitive	0.608593314454542	1	0.665154595208663	0.999998566544074	0.391406685545458	1.69713267666709e-28	0.334845404791337	1.43345592588019e-06
1114	T118V	Collaterally Neutral	Collaterally Neutral	Collaterally Neutral	Collaterally Sensitive	0.405286288695653	0.710774917638017	0.281610708842802	1	0.594713711304347	0.289225082361983	0.718389291157198	2.03463035349732e-185
1115	T118W	Collaterally Neutral	Collaterally Sensitive	Collaterally Sensitive	Collaterally Sensitive	0.568765109389765	0.999999999999935	0.999999999999964	0.999994907742089	0.431234890610235	6.54286105718927e-14	3.64632762662001e-14	5.09225791086499e-06
1116	T118Y	Collaterally Neutral	Collaterally Sensitive	Collaterally Sensitive	Collaterally Sensitive	0.66663894324192	0.88098010695116	0.885532076704327	1	0.33336105675808	0.11901989304884	0.114467923295673	1.97496694685587e-68
1117	V119A	Collaterally Neutral	Collaterally Resistant	Collaterally Sensitive	Collaterally Sensitive	0.599442494535963	0.000443671926889877	0.983860527447358	1	0.400557505464037	0.99955632807311	0.0161394725526425	0
1118	V119C	Collaterally Neutral	Collaterally Neutral	Collaterally Sensitive	Collaterally Sensitive	0.739841414378103	0.132680985969607	0.999999846443114	0.999039474039591	0.260158585621897	0.867319014030393	1.53556885917881e-07	0.000960525960408987
1119	V119F	Collaterally Neutral	Collaterally Neutral	Collaterally Sensitive	Collaterally Sensitive	0.775427951606692	0.770640162255266	0.98168895190321	1	0.224572048393308	0.229359837744734	0.0183110480967896	1.81175451767309e-91
1120	V119G	Collaterally Sensitive	Collaterally Sensitive	Collaterally Sensitive	Collaterally Sensitive	1	1	1	1	1.96420812960498e-178	3.46901499746868e-37	1.34745088049607e-35	5.89917156295624e-188
1121	V119H	Collaterally Sensitive	Collaterally Sensitive	Collaterally Sensitive	Collaterally Sensitive	1	0.924761447406638	0.999999999045884	1	6.14115436027835e-103	0.0752385525933616	9.54115955961317e-10	2.54928683416475e-39
1122	V119K	Collaterally Sensitive	Collaterally Sensitive	Collaterally Sensitive	Collaterally Sensitive	0.993229167772164	0.999999999999996	1	1	0.00677083222783644	3.74492442214737e-15	0	0
1123	V119N	Collaterally Neutral	Collaterally Neutral	Collaterally Sensitive	Collaterally Sensitive	0.644461944192738	0.55128331373859	0.99999999877892	1	0.355538055807262	0.44871668626141	1.2210800964681e-09	0
1124	V119P	Collaterally Neutral	Collaterally Sensitive	Collaterally Sensitive	Collaterally Sensitive	0.841071684431773	0.999988866702194	0.973862205020365	1	0.158928315568227	1.11332978056184e-05	0.0261377949796347	1.88674147948821e-234
1125	V119Q	Collaterally Sensitive	Collaterally Sensitive	Collaterally Sensitive	Collaterally Sensitive	0.968528974927116	0.994913686041571	0.999982991928598	0.999999931267118	0.0314710250728838	0.0050863139584292	1.70080714016906e-05	6.87328821261999e-08
1126	V119R	Collaterally Neutral	Collaterally Sensitive	Collaterally Sensitive	Collaterally Sensitive	0.788836422152237	1	0.999999999758097	0.999999999998871	0.211163577847762	1.63251255968131e-113	2.41903113240127e-10	1.12879542237199e-12
1127	V119S	Collaterally Neutral	Collaterally Sensitive	Collaterally Sensitive	Collaterally Sensitive	0.738228132752309	0.960052639317591	1	1	0.261771867247691	0.0399473606824091	3.7116773624394e-17	2.29581497772074e-23
1128	V119T	Collaterally Sensitive	Collaterally Neutral	Collaterally Neutral	Collaterally Sensitive	0.970004135077254	0.311163522272228	0.621410976089948	0.999999999912107	0.0299958649227461	0.688836477727772	0.378589023910052	8.7892678887778e-11
1129	V119W	Collaterally Neutral	Collaterally Sensitive	Collaterally Sensitive	Collaterally Sensitive	0.826167214744339	1	0.99999996823269	1	0.173832785255661	0	3.17673096760806e-08	0
1130	V119Y	Collaterally Neutral	Collaterally Neutral	Collaterally Sensitive	Collaterally Sensitive	0.131684231553564	0.582431844427773	1	0.999999999981288	0.868315768446436	0.417568155572227	1.59479409002925e-20	1.87117707713513e-11
1131	R120C	Collaterally Resistant	Collaterally Resistant	Collaterally Resistant	Collaterally Neutral	0.00823469070278293	0.0025058854275829	0.0512025420656106	0.159744137004987	0.991765309297217	0.997494114572417	0.948797457934389	0.840255862995013
1132	R120E	Collaterally Resistant	Collaterally Neutral	Collaterally Neutral	Collaterally Resistant	0.0756675955573691	0.178449929456621	0.435943797351298	0.0944957833558574	0.924332404442631	0.821550070543379	0.564056202648702	0.905504216644143
1133	R120G	Collaterally Neutral	Collaterally Resistant	Collaterally Neutral	Collaterally Resistant	0.311567680015552	0.116463598908617	0.456052234926208	0.0187796659866727	0.688432319984448	0.883536401091383	0.543947765073792	0.981220334013327
1134	R120I	Collaterally Resistant	Collaterally Resistant	Collaterally Resistant	Collaterally Sensitive	0.000171468016266885	0.0682414272184244	2.33146835171283e-14	0.992771260836481	0.999828531983733	0.931758572781576	0.999999999999977	0.00722873916351905
1135	R120M	Collaterally Neutral	Collaterally Neutral	Collaterally Neutral	Collaterally Neutral	0.614446611333404	0.644258316229668	0.649432068319322	0.822162999602175	0.385553388666596	0.355741683770332	0.350567931680678	0.177837000397825
1136	R120P	Collaterally Neutral	Collaterally Resistant	Collaterally Sensitive	Collaterally Sensitive	0.221598390603659	9.66026481030724e-10	0.898602101940529	1	0.778401609396341	0.999999999033974	0.101397898059471	1.60099255969624e-20
1137	R120T	Collaterally Neutral	Collaterally Resistant	Collaterally Neutral	Collaterally Neutral	0.258304974673715	1.71235763289923e-05	0.306798973502942	0.378739382408938	0.741695025326285	0.999982876423671	0.693201026497058	0.621260617591062
1138	R120V	Collaterally Neutral	Collaterally Resistant	Collaterally Neutral	Collaterally Sensitive	0.315686366869987	0.0773564345688609	0.299348488655053	1	0.684313633130013	0.922643565431139	0.700651511344947	1.19068224563161e-245
1139	R120W	Collaterally Resistant	Collaterally Neutral	Collaterally Resistant	Collaterally Resistant	0.0433553401056402	0.145080590946221	0.109748512150198	0.106783090807417	0.95664465989436	0.854919409053779	0.890251487849802	0.893216909192583
1140	R120Y	Collaterally Neutral	Collaterally Neutral	Collaterally Neutral	Collaterally Neutral	0.364449664422745	0.238221566946473	0.564597112271354	0.431285310358854	0.635550335577255	0.761778433053527	0.435402887728646	0.568714689641146
1141	E121A	Collaterally Neutral	Collaterally Neutral	Collaterally Resistant	Collaterally Sensitive	0.621317491998106	0.619538272493595	4.79169925959866e-10	1	0.378682508001894	0.380461727506405	0.99999999952083	2.37589470274989e-203
1142	E121C	Collaterally Neutral	Collaterally Neutral	Collaterally Sensitive	Collaterally Sensitive	0.67674751907492	0.390802952628026	0.981477299456876	1	0.32325248092508	0.609197047371974	0.0185227005431242	1.42317365398038e-31
1143	E121F	Collaterally Neutral	Collaterally Sensitive	Collaterally Sensitive	Collaterally Sensitive	0.830561592184116	0.999991602604797	0.999891381483052	1	0.169438407815884	8.39739520285567e-06	0.000108618516947847	2.81826996033972e-28
1144	E121G	Collaterally Neutral	Collaterally Neutral	Collaterally Resistant	Collaterally Sensitive	0.659327124720523	0.629669135098173	0.00566055865151927	0.999978203364029	0.340672875279477	0.370330864901827	0.994339441348481	2.17966359709148e-05
1145	E121H	Collaterally Neutral	Collaterally Neutral	Collaterally Neutral	Collaterally Sensitive	0.729745134544238	0.606634375159177	0.227507215933086	0.999908627335828	0.270254865455762	0.393365624840823	0.772492784066914	9.13726641715495e-05
1146	E121I	Collaterally Sensitive	Collaterally Sensitive	Collaterally Sensitive	Collaterally Sensitive	1	1	1	0.999077205906059	1.39707107749257e-79	2.64581947122664e-117	0	0.000922794093941252
1147	E121K	Collaterally Neutral	Collaterally Neutral	Collaterally Neutral	Collaterally Sensitive	0.54633281010252	0.589710233840306	0.495074098329351	0.99999982848469	0.45366718989748	0.410289766159694	0.504925901670649	1.71515310282181e-07
1148	E121L	Collaterally Sensitive	Collaterally Sensitive	Collaterally Sensitive	Collaterally Sensitive	0.97609043464185	0.997963174466312	1	1	0.0239095653581504	0.00203682553368763	0	1.13837236097722e-56
1149	E121M	Collaterally Neutral	Collaterally Neutral	Collaterally Resistant	Collaterally Sensitive	0.472920429634875	0.287043716378321	0.0586414639441672	1	0.527079570365125	0.712956283621679	0.941358536055833	1.85504804714509e-96
1150	E121N	Collaterally Neutral	Collaterally Neutral	Collaterally Neutral	Collaterally Sensitive	0.820734280888585	0.727003162513608	0.826716099243852	0.960783805073859	0.179265719111415	0.272996837486392	0.173283900756148	0.0392161949261415
1151	E121P	Collaterally Sensitive	Collaterally Sensitive	Collaterally Sensitive	Collaterally Sensitive	1	0.999999999999998	1	1	0	2.38600623590172e-15	0	2.71758400529101e-27
1152	E121Q	Collaterally Neutral	Collaterally Neutral	Collaterally Sensitive	Collaterally Sensitive	0.661183119325954	0.585038890365746	0.999999999999975	0.999999999989106	0.338816880674046	0.414961109634254	2.53570640834014e-14	1.08937680929001e-11
1153	E121R	Collaterally Neutral	Collaterally Neutral	Collaterally Neutral	Collaterally Sensitive	0.752640634303101	0.650346255929138	0.877145848197105	0.999999937917164	0.247359365696899	0.349653744070862	0.122854151802895	6.20828364443332e-08
1154	E121S	Collaterally Neutral	Collaterally Neutral	Collaterally Resistant	Collaterally Sensitive	0.617039803802616	0.411296442035001	0.106318131605517	0.996929925658189	0.382960196197384	0.588703557964999	0.893681868394483	0.00307007434181078
1155	E121V	Collaterally Sensitive	Collaterally Sensitive	Collaterally Sensitive	Collaterally Sensitive	0.936776628345489	1	0.999725216590614	0.989446522448187	0.0632233716545113	1.96240804066768e-46	0.000274783409386342	0.0105534775518126
1156	E121W	Collaterally Neutral	Collaterally Sensitive	Collaterally Sensitive	Collaterally Sensitive	0.600376467229293	0.999999999999994	1	0.999999999999059	0.399623532770707	6.0281288674155e-15	8.38524351906755e-286	9.4060307941849e-13
1157	E121Y	Collaterally Neutral	Collaterally Sensitive	Collaterally Sensitive	Collaterally Sensitive	0.570851695420723	0.980671874734126	1	0.999999988060953	0.429148304579277	0.0193281252658739	0	1.19390468956521e-08
1158	L122A	Collaterally Neutral	Collaterally Neutral	Collaterally Sensitive	Collaterally Sensitive	0.755277367619974	0.433782643094592	0.999999999999993	1	0.244722632380026	0.566217356905408	7.38116686391324e-15	1.06820468654278e-70
1159	L122C	Collaterally Sensitive	Collaterally Neutral	Collaterally Sensitive	Collaterally Sensitive	0.991735521047827	0.404755139299051	0.89820070404753	1	0.00826447895217265	0.595244860700949	0.10179929595247	7.10429972401926e-27
1160	L122D	Collaterally Sensitive	Collaterally Sensitive	Collaterally Sensitive	Collaterally Sensitive	0.999999977367142	0.999992409898306	0.999999257962779	1	2.26328582196981e-08	7.59010169451139e-06	7.42037221070478e-07	2.75970198645749e-220
1161	L122E	Collaterally Sensitive	Collaterally Sensitive	Collaterally Sensitive	Collaterally Sensitive	1	0.999980910576692	1	1	9.9913511850277e-73	1.90894233078754e-05	4.16905116544567e-61	0
1162	L122F	Collaterally Sensitive	Collaterally Neutral	Collaterally Sensitive	Collaterally Sensitive	0.999646122568195	0.846831151419663	1	0.999999932995334	0.00035387743180494	0.153168848580337	1.77217129604301e-207	6.7004666362402e-08
1163	L122G	Collaterally Sensitive	Collaterally Sensitive	Collaterally Sensitive	Collaterally Sensitive	0.998259802115322	1	1	0.999999883990171	0.00174019788467801	1.52473083233656e-54	0	1.16009829242273e-07
1164	L122H	Collaterally Sensitive	Collaterally Sensitive	Collaterally Sensitive	Collaterally Sensitive	0.917907697531691	1	1	1	0.0820923024683086	0	2.62385664313709e-91	7.65620374060842e-53
1165	L122I	Collaterally Sensitive	Collaterally Sensitive	Collaterally Neutral	Collaterally Sensitive	0.945444418570839	0.919090111242388	0.397646497517663	0.999991167015973	0.0545555814291609	0.080909888757612	0.602353502482337	8.83298402670741e-06
1166	L122M	Collaterally Neutral	Collaterally Neutral	Collaterally Neutral	Collaterally Sensitive	0.866767904380324	0.283351041263885	0.556845519524581	1	0.133232095619676	0.716648958736115	0.443154480475419	8.96919819185278e-49
1167	L122N	Collaterally Sensitive	Collaterally Sensitive	Collaterally Sensitive	Collaterally Sensitive	0.998480100395994	1	1	1	0.0015198996040063	2.20370969455169e-107	3.64277201109083e-31	0
1168	L122P	Collaterally Sensitive	Collaterally Sensitive	Collaterally Sensitive	Collaterally Sensitive	1	0.999999999999775	1	1	7.2392039109815e-17	2.24954963073432e-13	1.62942299376826e-189	2.06960469327841e-77
1169	L122Q	Collaterally Sensitive	Collaterally Sensitive	Collaterally Sensitive	Collaterally Sensitive	0.999990996221006	0.999999998347253	1	1	9.00377899384215e-06	1.65274708078672e-09	1.22366080304129e-36	0
1170	L122R	Collaterally Sensitive	Collaterally Sensitive	Collaterally Sensitive	Collaterally Sensitive	0.999994867598772	1	1	1	5.13240122799738e-06	0	0	1.01661442622088e-26
1171	L122S	Collaterally Neutral	Collaterally Sensitive	Collaterally Sensitive	Collaterally Sensitive	0.591828904848128	0.954469083621694	1	0.99999999973173	0.408171095151872	0.0455309163783064	1.63648926678759e-19	2.68270158623768e-10
1172	L122T	Collaterally Sensitive	Collaterally Sensitive	Collaterally Sensitive	Collaterally Sensitive	1	0.999999999921544	0.999999801694788	1	7.42596023230204e-43	7.84560628830351e-11	1.98305212250381e-07	6.07353535249605e-22
1173	L122V	Collaterally Sensitive	Collaterally Neutral	Collaterally Sensitive	Collaterally Sensitive	1	0.758871156615093	0.955163204503126	1	0	0.241128843384908	0.0448367954968738	0
1174	C123A	Collaterally Sensitive	Collaterally Neutral	Collaterally Neutral	Collaterally Sensitive	0.953893281153401	0.606803624634836	0.761517296604347	0.999920583606596	0.0461067188465985	0.393196375365164	0.238482703395653	7.94163934041976e-05
1175	C123D	Collaterally Sensitive	Collaterally Sensitive	Collaterally Sensitive	Collaterally Sensitive	0.999999604742204	1	0.999999999999997	1	3.95257796161099e-07	0	2.58391941040289e-15	2.21119742116581e-73
1176	C123E	Collaterally Sensitive	Collaterally Sensitive	Collaterally Sensitive	Collaterally Sensitive	0.999309735602763	1	1	1	0.000690264397236472	0	1.34341094746779e-165	1.61540735449702e-20
1177	C123F	Collaterally Sensitive	Collaterally Sensitive	Collaterally Sensitive	Collaterally Sensitive	0.999240226671263	1	1	1	0.000759773328736766	2.89764368856606e-16	0	5.43726275915223e-258
1178	C123G	Collaterally Neutral	Collaterally Neutral	Collaterally Sensitive	Collaterally Sensitive	0.258148695262918	0.602299411365813	0.894753940602524	1	0.741851304737082	0.397700588634187	0.105246059397476	4.52137415051025e-45
1179	C123H	Collaterally Sensitive	Collaterally Sensitive	Collaterally Sensitive	Collaterally Sensitive	0.999862810190687	1	1	1	0.000137189809312729	7.64544018766049e-21	3.1504914690974e-43	3.13785017238951e-18
1180	C123I	Collaterally Neutral	Collaterally Neutral	Collaterally Sensitive	Collaterally Sensitive	0.44793248844268	0.200453368738177	0.898943468221375	0.99999997541036	0.55206751155732	0.799546631261823	0.101056531778625	2.45896398262429e-08
1181	C123K	Collaterally Sensitive	Collaterally Sensitive	Collaterally Sensitive	Collaterally Sensitive	0.999999539815397	0.999999999985888	0.999999998352177	1	4.6018460310835e-07	1.41122247424375e-11	1.6478232116994e-09	1.10755957681768e-17
1182	C123L	Collaterally Neutral	Collaterally Neutral	Collaterally Neutral	Collaterally Sensitive	0.51815202000203	0.57688280973705	0.863329039834861	0.99999994215682	0.48184797999797	0.42311719026295	0.13667096016514	5.78431801245473e-08
1183	C123M	Collaterally Neutral	Collaterally Neutral	Collaterally Sensitive	Collaterally Sensitive	0.623967045316064	0.578041949930133	0.999541560606204	0.990117397849214	0.376032954683936	0.421958050069867	0.000458439393795548	0.0098826021507858
1184	C123N	Collaterally Sensitive	Collaterally Sensitive	Collaterally Sensitive	Collaterally Sensitive	0.88888146354668	1	0.999999999999568	1	0.11111853645332	0	4.31523181772953e-13	8.12101148796591e-50
1185	C123P	Collaterally Sensitive	Collaterally Sensitive	Collaterally Sensitive	Collaterally Sensitive	0.98350741468542	0.980901019391873	1	0.999999999644868	0.0164925853145804	0.0190989806081272	1.04054740756472e-96	3.55131709325767e-10
1186	C123Q	Collaterally Neutral	Collaterally Sensitive	Collaterally Sensitive	Collaterally Sensitive	0.529134771945227	1	1	0.996112564646278	0.470865228054773	2.57652113980578e-17	2.36243535908622e-77	0.00388743535372237
1187	C123R	Collaterally Sensitive	Collaterally Sensitive	Collaterally Sensitive	Collaterally Sensitive	0.999999360231251	0.999999999999852	0.999719812829199	1	6.39768749183963e-07	1.48017937659898e-13	0.000280187170800743	0
1188	C123S	Collaterally Sensitive	Collaterally Neutral	Collaterally Sensitive	Collaterally Sensitive	0.967282454404305	0.743060008085772	0.999510828207603	1	0.0327175455956953	0.256939991914228	0.000489171792396796	4.71517495051463e-163
1189	C123T	Collaterally Sensitive	Collaterally Sensitive	Collaterally Sensitive	Collaterally Sensitive	0.879861481587243	0.999907075421236	0.999999987594218	1	0.120138518412757	9.29245787641595e-05	1.2405782391698e-08	0
1190	C123V	Collaterally Neutral	Collaterally Neutral	Collaterally Sensitive	Collaterally Sensitive	0.367024531595401	0.450013045502972	1	1	0.632975468404599	0.549986954497028	7.85571376988673e-27	2.33876424888767e-30
1191	C123W	Collaterally Sensitive	Collaterally Sensitive	Collaterally Sensitive	Collaterally Sensitive	0.999424588360427	0.995226032310324	1	0.999999999999999	0.000575411639572685	0.00477396768967609	1.18180432786005e-101	1.22136985311021e-15
1192	C123Y	Collaterally Sensitive	Collaterally Sensitive	Collaterally Sensitive	Collaterally Sensitive	0.999997275359665	0.999999999929676	0.999999999989345	1	2.72464033454452e-06	7.03234969421703e-11	1.06549247604477e-11	1.96237675025417e-130
1193	S124C	Collaterally Sensitive	Collaterally Sensitive	Collaterally Neutral	Collaterally Sensitive	0.973771082253578	0.999996983052645	0.766021540966473	0.99984627313564	0.0262289177464221	3.01694735519981e-06	0.233978459033527	0.000153726864359956
1194	S124D	Collaterally Neutral	Collaterally Neutral	Collaterally Resistant	Collaterally Resistant	0.178619497237834	0.263586501175899	0	0.000177206838827493	0.821380502762166	0.736413498824101	1	0.999822793161173
1195	S124H	Collaterally Neutral	Collaterally Neutral	Collaterally Sensitive	Collaterally Neutral	0.319052262369549	0.41773258572682	1	0.410463666570858	0.680947737630451	0.58226741427318	3.61466752047227e-63	0.589536333429142
1196	S124K	Collaterally Neutral	Collaterally Neutral	Collaterally Neutral	Collaterally Sensitive	0.787387101820882	0.814547584493701	0.813811650643322	0.974569382697682	0.212612898179118	0.185452415506299	0.186188349356678	0.025430617302318
1197	S124P	Collaterally Neutral	Collaterally Neutral	Collaterally Neutral	Collaterally Neutral	0.194855718632466	0.828510035017844	0.808022421695305	0.770579645559818	0.805144281367534	0.171489964982156	0.191977578304695	0.229420354440182
1198	S124Y	Collaterally Sensitive	Collaterally Sensitive	Collaterally Neutral	Collaterally Neutral	0.998533046817265	0.99999987717465	0.56735998871415	0.776842577274302	0.00146695318273471	1.22825350038726e-07	0.43264001128585	0.223157422725698
1199	A125C	Collaterally Neutral	Collaterally Neutral	Collaterally Sensitive	Collaterally Sensitive	0.543251564904062	0.798091601019635	0.986563990740039	0.998483477845433	0.456748435095938	0.201908398980365	0.0134360092599607	0.00151652215456714
1200	A125D	Collaterally Neutral	Collaterally Sensitive	Collaterally Sensitive	Collaterally Sensitive	0.352411460680138	0.999773549499597	1	1	0.647588539319862	0.000226450500402799	1.62018983555929e-45	3.61427124971613e-88
1201	A125F	Collaterally Neutral	Collaterally Sensitive	Collaterally Sensitive	Collaterally Sensitive	0.418465069466966	0.998962274746175	0.999999997676074	1	0.581534930533034	0.00103772525382466	2.32392561160405e-09	0
1202	A125G	Collaterally Neutral	Collaterally Sensitive	Collaterally Neutral	Collaterally Sensitive	0.539200584750595	0.884071279705101	0.338188278296932	1	0.460799415249405	0.115928720294899	0.661811721703068	0
1203	A125I	Collaterally Resistant	Collaterally Resistant	Collaterally Sensitive	Collaterally Sensitive	0.0203786300692499	0.00439152504198204	0.999660979883452	1	0.97962136993075	0.995608474958018	0.000339020116548319	2.10190830822395e-54
1204	A125L	Collaterally Neutral	Collaterally Sensitive	Collaterally Sensitive	Collaterally Sensitive	0.533129619966919	0.904669978217287	1	0.999999999991457	0.466870380033081	0.0953300217827132	3.47316048061549e-49	8.54297135336157e-12
1205	A125M	Collaterally Sensitive	Collaterally Neutral	Collaterally Sensitive	Collaterally Sensitive	0.930154886343175	0.702735190020745	0.99999999999214	1	0.0698451136568252	0.297264809979254	7.86047800383578e-12	0
1206	A125N	Collaterally Sensitive	Collaterally Neutral	Collaterally Sensitive	Collaterally Sensitive	0.997990104586122	0.603272167940294	0.925564861272625	0.998982781649535	0.00200989541387749	0.396727832059706	0.074435138727375	0.00101721835046504
1207	A125P	Collaterally Sensitive	Collaterally Sensitive	Collaterally Sensitive	Collaterally Sensitive	0.985512009825468	0.993107618839731	0.993312532516182	0.988328671332269	0.0144879901745315	0.00689238116026924	0.00668746748381768	0.0116713286677309
1208	A125Q	Collaterally Sensitive	Collaterally Sensitive	Collaterally Sensitive	Collaterally Sensitive	0.961155262894422	0.961958824392323	1	0.999999996633778	0.0388447371055776	0.0380411756076773	3.05134861632243e-23	3.36622198267098e-09
1209	A125R	Collaterally Sensitive	Collaterally Sensitive	Collaterally Sensitive	Collaterally Sensitive	0.999017199417255	1	1	1	0.000982800582744576	0	1.1041836179575e-60	1.79131611838451e-17
1210	A125S	Collaterally Neutral	Collaterally Sensitive	Collaterally Neutral	Collaterally Sensitive	0.400413663247847	0.964008892893003	0.325641399767046	0.995193455469699	0.599586336752153	0.0359911071069974	0.674358600232954	0.00480654453030121
1211	A125T	Collaterally Neutral	Collaterally Resistant	Collaterally Sensitive	Collaterally Sensitive	0.447883504869658	0.0380530160802035	0.924127885000766	1	0.552116495130342	0.961946983919796	0.0758721149992343	4.86199577126193e-23
1212	A125V	Collaterally Neutral	Collaterally Sensitive	Collaterally Neutral	Collaterally Sensitive	0.78500729115646	0.997835464882949	0.798014251540161	1	0.21499270884354	0.00216453511705067	0.201985748459839	3.06918777662146e-46
1213	A125W	Collaterally Neutral	Collaterally Sensitive	Collaterally Sensitive	Collaterally Sensitive	0.266756739992602	0.999930490703033	0.999999999986087	1	0.733243260007398	6.95092969674425e-05	1.39134206400165e-11	3.45716132268626e-34
1214	A126C	Collaterally Neutral	Collaterally Neutral	Collaterally Neutral	Collaterally Sensitive	0.611530486823831	0.57239292760293	0.373518400372284	0.983771018247771	0.388469513176169	0.42760707239707	0.626481599627716	0.0162289817522294
1215	A126D	Collaterally Sensitive	Collaterally Sensitive	Collaterally Sensitive	Collaterally Sensitive	0.999999999990916	0.999999999999999	1	1	9.08436268617246e-12	5.24181215519446e-16	8.17729028255648e-30	2.92161752396815e-89
1216	A126E	Collaterally Sensitive	Collaterally Sensitive	Collaterally Sensitive	Collaterally Sensitive	0.998496866158329	1	0.999999999129564	0.999999999979784	0.00150313384167135	0	8.70435528367552e-10	2.02163131065759e-11
1217	A126F	Collaterally Sensitive	Collaterally Sensitive	Collaterally Sensitive	Collaterally Sensitive	1	1	0.999912474418419	0.999998021115672	2.40171055209296e-46	2.00595432529784e-153	8.75255815813449e-05	1.97888432801668e-06
1218	A126G	Collaterally Resistant	Collaterally Neutral	Collaterally Neutral	Collaterally Sensitive	0	0.4981302103209	0.229468286574996	1	1	0.5018697896791	0.770531713425004	4.40703245945777e-32
1219	A126H	Collaterally Sensitive	Collaterally Sensitive	Collaterally Sensitive	Collaterally Sensitive	0.999999995390576	0.999999998404339	0.999985955583631	1	4.60942399790833e-09	1.59566080886775e-09	1.40444163688988e-05	0
1220	A126I	Collaterally Resistant	Collaterally Resistant	Collaterally Sensitive	Collaterally Sensitive	0.0927082197037072	0.104001353151198	0.917520035579963	0.989016157989937	0.907291780296293	0.895998646848802	0.0824799644200375	0.0109838420100627
1221	A126K	Collaterally Sensitive	Collaterally Sensitive	Collaterally Sensitive	Collaterally Sensitive	1	1	0.999999998876299	0.999999999999842	6.37625902279284e-33	0	1.12370135506047e-09	1.57649660870414e-13
1222	A126L	Collaterally Neutral	Collaterally Sensitive	Collaterally Sensitive	Collaterally Sensitive	0.395696482353074	1	0.999952921266724	1	0.604303517646926	9.82284108121179e-109	4.70787332759785e-05	5.49018610521035e-27
1223	A126M	Collaterally Neutral	Collaterally Neutral	Collaterally Neutral	Collaterally Sensitive	0.514878263256742	0.558793571028165	0.372162630228219	0.999999963283639	0.485121736743258	0.441206428971835	0.627837369771781	3.67163611277476e-08
1224	A126N	Collaterally Neutral	Collaterally Neutral	Collaterally Sensitive	Collaterally Sensitive	0.61084006597676	0.677117946301011	0.989030881210922	0.999831319423718	0.38915993402324	0.322882053698989	0.0109691187890781	0.000168680576281806
1225	A126P	Collaterally Sensitive	Collaterally Sensitive	Collaterally Sensitive	Collaterally Sensitive	1	1	0.999999967105449	0.999980124731902	1.70076149975193e-48	9.06411356038262e-51	3.28945512380511e-08	1.98752680981807e-05
1226	A126Q	Collaterally Resistant	Collaterally Sensitive	Collaterally Sensitive	Collaterally Sensitive	0.0996835542110649	0.976488783808664	0.999999999999838	0.999999999999998	0.900316445788935	0.0235112161913361	1.61496077453247e-13	2.28893035388449e-15
1227	A126R	Collaterally Sensitive	Collaterally Sensitive	Collaterally Sensitive	Collaterally Sensitive	1	1	0.999966054447777	1	2.01967235091682e-24	5.81920759116215e-36	3.39455522230738e-05	0
1228	A126S	Collaterally Resistant	Collaterally Neutral	Collaterally Neutral	Collaterally Sensitive	0.0140792580004907	0.722909515681325	0.664729482581043	0.998698215595985	0.985920741999509	0.277090484318675	0.335270517418957	0.00130178440401505
1229	A126T	Collaterally Neutral	Collaterally Neutral	Collaterally Neutral	Collaterally Sensitive	0.371258371698113	0.620445019983698	0.245639625779137	0.91714343094269	0.628741628301887	0.379554980016302	0.754360374220863	0.08285656905731
1230	A126V	Collaterally Resistant	Collaterally Neutral	Collaterally Neutral	Collaterally Sensitive	0.0837987118158022	0.171333932475321	0.335138372168451	0.998445587630673	0.916201288184198	0.828666067524679	0.664861627831549	0.00155441236932647
1231	A126W	Collaterally Sensitive	Collaterally Sensitive	Collaterally Sensitive	Collaterally Sensitive	1	0.999999999999997	0.999999999999985	0.999999997974492	1.67663326314189e-61	3.04355217398764e-15	1.45702585394094e-14	2.02550780477553e-09
1232	A126Y	Collaterally Sensitive	Collaterally Sensitive	Collaterally Sensitive	Collaterally Sensitive	0.999999999999992	1	1	1	7.75860952690839e-15	3.54979675760273e-187	2.68867589396108e-74	4.76778771260322e-58
1233	I127E	Collaterally Sensitive	Collaterally Sensitive	Collaterally Sensitive	Collaterally Sensitive	0.999999999999772	0.999999999999999	0.999999999189993	1	2.27905568320816e-13	1.23364257948602e-15	8.10007123533314e-10	0
1234	I127F	Collaterally Neutral	Collaterally Sensitive	Collaterally Sensitive	Collaterally Sensitive	0.661435811587928	0.999999999490317	1	1	0.338564188412072	5.09682735194895e-10	3.94036061007977e-88	0
1235	I127G	Collaterally Sensitive	Collaterally Sensitive	Collaterally Sensitive	Collaterally Sensitive	1	1	1	1	1.37710791489281e-62	2.25770019014682e-135	5.26725277300206e-34	0
1236	I127H	Collaterally Neutral	Collaterally Sensitive	Collaterally Sensitive	Collaterally Sensitive	0.696979950407284	0.999999864013497	0.999999822013106	0.99967612113002	0.303020049592716	1.35986502579928e-07	1.77986893754085e-07	0.000323878869980437
1237	I127K	Collaterally Sensitive	Collaterally Sensitive	Collaterally Sensitive	Collaterally Sensitive	1	1	1	0.999999998063823	5.01917436093338e-45	0	2.33554722174657e-81	1.93617748872194e-09
1238	I127L	Collaterally Neutral	Collaterally Neutral	Collaterally Sensitive	Collaterally Sensitive	0.49308105519599	0.503329120430639	0.99999999686662	1	0.50691894480401	0.496670879569361	3.13337995502776e-09	5.26802381396936e-35
1239	I127P	Collaterally Sensitive	Collaterally Sensitive	Collaterally Sensitive	Collaterally Sensitive	0.999999999989079	1	1	0.999999999847504	1.09210868288223e-11	1.4166095471486e-194	0	1.52495646442211e-10
1240	I127Q	Collaterally Neutral	Collaterally Sensitive	Collaterally Sensitive	Collaterally Sensitive	0.622458794111679	0.999999425633416	0.999993927329613	1	0.377541205888321	5.74366583986196e-07	6.07267038699685e-06	3.5005367325244e-24
1241	I127R	Collaterally Sensitive	Collaterally Sensitive	Collaterally Sensitive	Collaterally Sensitive	1	1	1	0.999999999819309	0	2.5877584236058e-56	9.62176897428779e-19	1.80690996899298e-10
1242	I127S	Collaterally Neutral	Collaterally Sensitive	Collaterally Sensitive	Collaterally Sensitive	0.52567905124981	0.999999994170195	0.999862455508908	1	0.47432094875019	5.82980528995588e-09	0.000137544491091962	1.59097291826174e-85
1243	I127T	Collaterally Neutral	Collaterally Neutral	Collaterally Neutral	Collaterally Sensitive	0.245858636286178	0.552220626887366	0.640552060551282	1	0.754141363713822	0.447779373112634	0.359447939448718	7.50984536472874e-69
1244	I127Y	Collaterally Sensitive	Collaterally Sensitive	Collaterally Sensitive	Collaterally Sensitive	0.999999997877871	1	1	0.999997157349709	2.12212924551494e-09	1.19590331814402e-179	0	2.8426502914494e-06
1245	T128C	Collaterally Neutral	Collaterally Neutral	Collaterally Neutral	Collaterally Sensitive	0.308537702388175	0.373321653370932	0.37863052071367	0.915084071594234	0.691462297611825	0.626678346629068	0.62136947928633	0.0849159284057662
1246	T128D	Collaterally Neutral	Collaterally Neutral	Collaterally Neutral	Collaterally Sensitive	0.349404123070424	0.447068894675766	0.321146203965573	0.999920865894221	0.650595876929576	0.552931105324234	0.678853796034427	7.91341057789002e-05
1247	T128F	Collaterally Neutral	Collaterally Sensitive	Collaterally Sensitive	Collaterally Sensitive	0.541893246703958	0.97962523719036	0.999972288674496	1	0.458106753296042	0.0203747628096404	2.77113255040691e-05	6.89475552172114e-270
1248	T128P	Collaterally Neutral	Collaterally Sensitive	Collaterally Sensitive	Collaterally Sensitive	0.358471960645156	0.991954902182818	1	1	0.641528039354844	0.00804509781718205	9.21993453496008e-20	2.63198554607266e-85
1249	T128Q	Collaterally Neutral	Collaterally Sensitive	Collaterally Neutral	Collaterally Sensitive	0.483050987962431	0.947142412881548	0.479001677507859	0.99999518951141	0.516949012037569	0.0528575871184516	0.520998322492141	4.81048858975285e-06
1250	T128W	Collaterally Resistant	Collaterally Neutral	Collaterally Sensitive	Collaterally Sensitive	3.0875246801898e-05	0.478732507235666	0.999486941856575	0.999998619780915	0.999969124753198	0.521267492764334	0.000513058143424859	1.38021908503201e-06
1251	T128Y	Collaterally Neutral	Collaterally Sensitive	Collaterally Sensitive	Collaterally Sensitive	0.231736108813261	0.968890178528657	0.976652898947002	0.999999999994018	0.768263891186739	0.031109821471343	0.0233471010529983	5.98240021190173e-12
1252	M129H	Collaterally Neutral	Collaterally Neutral	Collaterally Neutral	Collaterally Sensitive	0.529057263458884	0.747913335434512	0.530641777528552	0.999629915136771	0.470942736541116	0.252086664565488	0.469358222471448	0.000370084863229446
1253	M129I	Collaterally Neutral	Collaterally Neutral	Collaterally Neutral	Collaterally Sensitive	0.393219249951316	0.589228581772776	0.562494110429111	0.99999999483246	0.606780750048684	0.410771418227224	0.437505889570889	5.16754034832588e-09
1254	M129V	Collaterally Neutral	Collaterally Neutral	Collaterally Neutral	Collaterally Neutral	0.577349074997338	0.765575566260826	0.710880573323293	0.654758698988843	0.422650925002662	0.234424433739174	0.289119426676707	0.345241301011157
1255	M129W	Collaterally Resistant	Collaterally Neutral	Collaterally Neutral	Collaterally Sensitive	0.00176352654453815	0.557908368281259	0.214142362557928	0.949328311443363	0.998236473455462	0.442091631718741	0.785857637442072	0.050671688556637
1256	S130F	Collaterally Sensitive	Collaterally Sensitive	Collaterally Sensitive	Collaterally Sensitive	0.999971963777341	1	1	1	2.80362226585739e-05	3.54926193069497e-289	7.38407474383317e-85	6.39014624378398e-35
1257	S130I	Collaterally Sensitive	Collaterally Sensitive	Collaterally Sensitive	Collaterally Sensitive	0.999999966289355	1	1	1	3.37106450006495e-08	5.30503526982849e-54	6.96879630729822e-25	0
1258	S130L	Collaterally Sensitive	Collaterally Sensitive	Collaterally Sensitive	Collaterally Sensitive	1	0.999999999999963	0.999967238431282	1	4.52976769996205e-25	3.744772084898e-14	3.27615687180917e-05	0
1259	S130P	Collaterally Sensitive	Collaterally Sensitive	Collaterally Sensitive	Collaterally Sensitive	1	1	1	1	0	1.14437397760802e-190	0	2.85073336612593e-277
1260	S130R	Collaterally Sensitive	Collaterally Sensitive	Collaterally Sensitive	Collaterally Sensitive	1	1	0.999999999999999	0.999910466782788	8.19925368530378e-61	5.94788175241261e-29	8.14540917000931e-16	8.95332172118534e-05
1261	S130T	Collaterally Sensitive	Collaterally Sensitive	Collaterally Sensitive	Collaterally Sensitive	0.997071728515163	1	1	0.999999999999997	0.00292827148483676	1.58270330919973e-144	9.78041751264423e-124	2.52568210292678e-15
1262	S130V	Collaterally Sensitive	Collaterally Sensitive	Collaterally Sensitive	Collaterally Sensitive	1	1	1	0.999997529750738	2.27593463538397e-151	0	3.02141210316869e-105	2.47024926240873e-06
1263	S130W	Collaterally Sensitive	Collaterally Sensitive	Collaterally Sensitive	Collaterally Sensitive	1	0.999999999995415	1	0.999999977698798	1.22204509275304e-23	4.58501294594544e-12	1.95034120956551e-28	2.23012024431145e-08
1264	S130Y	Collaterally Sensitive	Collaterally Sensitive	Collaterally Sensitive	Collaterally Sensitive	1	0.999999995191883	0.999996332162759	1	1.08515649348744e-155	4.8081170487472e-09	3.66783724068232e-06	1.76429940619298e-31
1265	D131A	Collaterally Sensitive	Collaterally Sensitive	Collaterally Sensitive	Collaterally Sensitive	0.999999973296748	0.999999999999994	1	1	2.67032517252851e-08	5.74229754446826e-15	2.27358325444565e-115	3.09199184891317e-54
1266	D131C	Collaterally Sensitive	Collaterally Sensitive	Collaterally Sensitive	Collaterally Sensitive	1	1	1	1	1.31133106053409e-37	2.43719781256553e-22	1.00896148279619e-19	1.29576168615926e-67
1267	D131E	Collaterally Sensitive	Collaterally Sensitive	Collaterally Sensitive	Collaterally Sensitive	0.999999383731052	1	1	0.999958302728344	6.16268947628604e-07	1.59370440275941e-16	1.27201004119131e-16	4.16972716558652e-05
1268	D131F	Collaterally Sensitive	Collaterally Sensitive	Collaterally Sensitive	Collaterally Sensitive	1	0.999999999972602	1	1	2.27210594956374e-197	2.73975619970996e-11	5.62480914142024e-175	1.45253346207086e-293
1269	D131G	Collaterally Sensitive	Collaterally Sensitive	Collaterally Sensitive	Collaterally Sensitive	1	1	1	0.999921090262471	0	0	0	7.89097375290137e-05
1270	D131H	Collaterally Sensitive	Collaterally Sensitive	Collaterally Sensitive	Collaterally Sensitive	0.99991096818398	0.999993808695579	1	1	8.90318160195622e-05	6.19130442077956e-06	2.79180517221434e-20	1.99302164530573e-131
1271	D131I	Collaterally Sensitive	Collaterally Sensitive	Collaterally Sensitive	Collaterally Sensitive	1	1	1	1	1.66822480241279e-20	5.09001095805935e-168	0	6.03084493464001e-38
1272	D131K	Collaterally Sensitive	Collaterally Sensitive	Collaterally Sensitive	Collaterally Sensitive	0.999999999922041	1	1	1	7.79591806732099e-11	1.0456721560891e-33	0	0
1273	D131L	Collaterally Sensitive	Collaterally Sensitive	Collaterally Sensitive	Collaterally Sensitive	1	1	1	1	1.63375215802808e-92	0	5.94749162699043e-24	7.95463570420789e-30
1274	D131M	Collaterally Sensitive	Collaterally Sensitive	Collaterally Sensitive	Collaterally Sensitive	0.996262388717358	1	1	1	0.00373761128264198	2.33731234733078e-36	5.85746755752983e-131	0
1275	D131N	Collaterally Sensitive	Collaterally Sensitive	Collaterally Sensitive	Collaterally Sensitive	1	1	1	1	0	0	8.81206664731598e-28	1.17900841881175e-56
1276	D131P	Collaterally Sensitive	Collaterally Sensitive	Collaterally Sensitive	Collaterally Sensitive	1	1	1	1	4.04351383870044e-20	1.43886736112741e-101	0	6.76764063192725e-24
1277	D131Q	Collaterally Sensitive	Collaterally Sensitive	Collaterally Sensitive	Collaterally Sensitive	0.999999997112599	1	1	1	2.88740133993454e-09	1.22361548948501e-47	8.02621354061567e-90	6.69771380637476e-245
1278	D131R	Collaterally Sensitive	Collaterally Sensitive	Collaterally Sensitive	Collaterally Sensitive	1	1	1	1	1.38851166154915e-21	3.63468692503921e-54	0	1.41242394216493e-21
1279	D131S	Collaterally Sensitive	Collaterally Sensitive	Collaterally Sensitive	Collaterally Sensitive	1	0.999999999991842	0.999971275321633	1	0	8.15804419748798e-12	2.87246783670926e-05	2.95817756133345e-39
1280	D131T	Collaterally Sensitive	Collaterally Sensitive	Collaterally Sensitive	Collaterally Sensitive	0.99982110340719	1	1	0.99999999919466	0.000178896592809826	0	1.10756343919478e-19	8.05339890953494e-10
1281	D131V	Collaterally Sensitive	Collaterally Sensitive	Collaterally Sensitive	Collaterally Sensitive	0.999999792076504	1	0.999999998421029	0.999998885127056	2.07923496329408e-07	0	1.5789706501701e-09	1.11487294377958e-06
1282	D131W	Collaterally Sensitive	Collaterally Sensitive	Collaterally Sensitive	Collaterally Sensitive	1	1	1	1	0	0	1.70325854537534e-128	7.13776930002399e-54
1283	D131Y	Collaterally Sensitive	Collaterally Sensitive	Collaterally Sensitive	Collaterally Sensitive	1	0.999999980100955	0.999999999999997	1	3.14444874833103e-89	1.98990448000905e-08	2.60638521016736e-15	0
1284	N132P	Collaterally Sensitive	Collaterally Sensitive	Collaterally Sensitive	Collaterally Sensitive	1	1	1	0.999999743821464	0	0	2.02163471185259e-41	2.56178536431883e-07
1285	T133C	Collaterally Neutral	Collaterally Neutral	Collaterally Resistant	Collaterally Sensitive	0.638285361507869	0.415104645229452	0.0867186341048458	0.999990469389873	0.361714638492131	0.584895354770548	0.913281365895154	9.53061012739308e-06
1286	T133D	Collaterally Sensitive	Collaterally Sensitive	Collaterally Sensitive	Collaterally Sensitive	0.885682675392216	1	1	0.995236324194238	0.114317324607784	7.29916883880218e-78	1.75395500111754e-54	0.00476367580576192
1287	T133F	Collaterally Neutral	Collaterally Neutral	Collaterally Neutral	Collaterally Sensitive	0.356046008695692	0.301197692089535	0.717841087820602	0.999052792574189	0.643953991304308	0.698802307910465	0.282158912179398	0.000947207425810781
1288	T133H	Collaterally Resistant	Collaterally Resistant	Collaterally Sensitive	Collaterally Sensitive	0.0946796244013393	0.121841423290407	0.999999994746136	0.999146066772633	0.905320375598661	0.878158576709593	5.25386425322686e-09	0.000853933227367001
1289	T133K	Collaterally Neutral	Collaterally Sensitive	Collaterally Sensitive	Collaterally Sensitive	0.645204948794778	0.999989220665979	1	0.999947869751262	0.354795051205222	1.07793340212487e-05	0	5.21302487384318e-05
1290	T133L	Collaterally Neutral	Collaterally Neutral	Collaterally Resistant	Collaterally Sensitive	0.358142901816803	0.278840546846844	0.0109156843740621	1	0.641857098183197	0.721159453153156	0.989084315625938	1.03771503495607e-58
1291	T133M	Collaterally Resistant	Collaterally Resistant	Collaterally Neutral	Collaterally Sensitive	0.0925764849609746	0.00067063908251741	0.54922429159045	0.998420259370898	0.907423515039025	0.999329360917483	0.45077570840955	0.00157974062910165
1292	T133N	Collaterally Neutral	Collaterally Neutral	Collaterally Sensitive	Collaterally Sensitive	0.342808593982524	0.344408925472369	1	1	0.657191406017476	0.655591074527631	0	1.40601423182518e-21
1293	T133P	Collaterally Neutral	Collaterally Neutral	Collaterally Sensitive	Collaterally Sensitive	0.388771164890402	0.870800061041436	1	1	0.611228835109598	0.129199938958564	2.3953749394651e-18	0
1294	T133R	Collaterally Neutral	Collaterally Sensitive	Collaterally Sensitive	Collaterally Sensitive	0.321309731525142	0.999999883028892	0.999999796293289	1	0.678690268474858	1.16971107762398e-07	2.03706710707401e-07	0
1295	T133V	Collaterally Resistant	Collaterally Resistant	Collaterally Neutral	Collaterally Sensitive	0.118792251463478	0.00605881036446576	0.181977674104309	1	0.881207748536522	0.993941189635534	0.818022325895691	9.4793060316796e-116
1296	T133W	Collaterally Neutral	Collaterally Sensitive	Collaterally Sensitive	Collaterally Sensitive	0.51353888736938	0.979811648442336	1	0.999999999774714	0.48646111263062	0.0201883515576638	4.16692977151975e-17	2.25286331755133e-10
1297	A134C	Collaterally Neutral	Collaterally Sensitive	Collaterally Sensitive	Collaterally Sensitive	0.376688214207466	0.910206282973805	1	1	0.623311785792534	0.0897937170261952	0	5.63649762280335e-25
1298	A134D	Collaterally Sensitive	Collaterally Sensitive	Collaterally Sensitive	Collaterally Sensitive	0.99999998373052	1	0.999945357657729	1	1.62694795759452e-08	0	5.46423422714267e-05	2.00999549233196e-32
1299	A134E	Collaterally Sensitive	Collaterally Sensitive	Collaterally Sensitive	Collaterally Sensitive	0.999990777994492	1	0.999999999999997	0.998717095157316	9.22200550842507e-06	2.58708011696223e-22	2.80119473154953e-15	0.00128290484268444
1300	A134G	Collaterally Neutral	Collaterally Resistant	Collaterally Sensitive	Collaterally Sensitive	0.308504648066231	0.0438628800838383	0.922422401875168	0.9999999968273	0.691495351933769	0.956137119916162	0.0775775981248322	3.17270019462391e-09
1301	A134H	Collaterally Sensitive	Collaterally Sensitive	Collaterally Sensitive	Collaterally Sensitive	0.999973448413322	1	1	1	2.65515866779305e-05	5.06125109947453e-31	2.34212113999804e-31	5.00453197624719e-69
1302	A134I	Collaterally Sensitive	Collaterally Sensitive	Collaterally Sensitive	Collaterally Sensitive	1	1	1	1	1.24582844915089e-123	1.15326987241387e-22	5.88371251806218e-19	7.85658260595422e-40
1303	A134K	Collaterally Sensitive	Collaterally Sensitive	Collaterally Sensitive	Collaterally Sensitive	1	0.999999999953548	1	1	3.94357601280217e-86	4.6452094418033e-11	2.72256268282499e-45	3.00069787347035e-100
1304	A134L	Collaterally Sensitive	Collaterally Sensitive	Collaterally Sensitive	Collaterally Sensitive	0.999999998894252	1	1	1	1.10574838488918e-09	0	1.29065860642947e-36	2.37521441411394e-60
1305	A134M	Collaterally Sensitive	Collaterally Sensitive	Collaterally Sensitive	Collaterally Sensitive	1	0.999999999941769	0.998994193625506	1	1.09633410294324e-35	5.82311652181637e-11	0.00100580637449356	6.4399870898884e-100
1306	A134N	Collaterally Sensitive	Collaterally Sensitive	Collaterally Sensitive	Collaterally Sensitive	1	1	0.999996437703228	1	3.18629068969077e-36	1.43274874271484e-21	3.56229677177925e-06	9.96637926046845e-178
1307	A134P	Collaterally Sensitive	Collaterally Sensitive	Collaterally Sensitive	Collaterally Sensitive	1	1	1	1	4.17385445744748e-68	2.50075963195684e-21	2.87072235812287e-55	0
1308	A134R	Collaterally Sensitive	Collaterally Sensitive	Collaterally Sensitive	Collaterally Sensitive	1	0.999999999999703	0.999999999999996	1	3.87484450638585e-222	2.96722163075695e-13	3.56508412899051e-15	1.85399882970229e-39
1309	A134S	Collaterally Resistant	Collaterally Resistant	Collaterally Neutral	Collaterally Sensitive	0	0.0127727433994457	0.611374945662791	0.994201034825138	1	0.987227256600554	0.388625054337209	0.00579896517486156
1310	A134T	Collaterally Neutral	Collaterally Sensitive	Collaterally Sensitive	Collaterally Sensitive	0.515655729756245	1	1	1	0.484344270243755	0	9.28875287727621e-31	2.39334897781436e-245
1311	A134V	Collaterally Sensitive	Collaterally Sensitive	Collaterally Sensitive	Collaterally Sensitive	0.999971109118601	0.999999902523296	1	1	2.8890881398992e-05	9.74767040035313e-08	4.17707412915961e-50	1.72761616070161e-27
1312	A134W	Collaterally Sensitive	Collaterally Sensitive	Collaterally Sensitive	Collaterally Sensitive	1	0.999999999999973	1	0.999998930863071	1.63003696078419e-27	2.68503845492245e-14	1.7484758424623e-20	1.06913692891924e-06
1313	A135C	Collaterally Neutral	Collaterally Resistant	Collaterally Neutral	Collaterally Sensitive	0.489802093860075	0	0.51573772077155	1	0.510197906139925	1	0.48426227922845	3.61853957038392e-19
1314	A135D	Collaterally Sensitive	Collaterally Sensitive	Collaterally Sensitive	Collaterally Sensitive	1	1	0.999999999999993	0.999997262848116	9.74693813670969e-33	1.37197852537856e-23	6.99537324979303e-15	2.73715188364114e-06
1315	A135E	Collaterally Sensitive	Collaterally Sensitive	Collaterally Sensitive	Collaterally Sensitive	1	1	0.999999760048974	1	0	3.5559281755534e-44	2.39951026109283e-07	8.97371462938514e-28
1316	A135F	Collaterally Neutral	Collaterally Sensitive	Collaterally Sensitive	Collaterally Sensitive	0.786789111425985	0.999921713474149	0.999991395016316	1	0.213210888574015	7.82865258507926e-05	8.6049836844166e-06	0
1317	A135G	Collaterally Neutral	Collaterally Neutral	Collaterally Neutral	Collaterally Sensitive	0.425683345513454	0.258113604366127	0.194722376972799	0.993703891288543	0.574316654486546	0.741886395633873	0.805277623027201	0.00629610871145728
1318	A135H	Collaterally Sensitive	Collaterally Sensitive	Collaterally Sensitive	Collaterally Sensitive	0.99999909888542	1	0.995840562670801	0.999993715298788	9.01114579921438e-07	0	0.00415943732919941	6.28470121241569e-06
1319	A135I	Collaterally Sensitive	Collaterally Sensitive	Collaterally Sensitive	Collaterally Sensitive	0.991693276597347	1	0.997019431365066	0.999999999999996	0.00830672340265308	2.42556188365158e-16	0.00298056863493427	4.2764238389779e-15
1320	A135K	Collaterally Sensitive	Collaterally Sensitive	Collaterally Sensitive	Collaterally Sensitive	1	0.999999999995338	1	1	3.91107675467011e-16	4.66174170270129e-12	1.90193333099582e-16	1.73128180796772e-72
1321	A135M	Collaterally Sensitive	Collaterally Sensitive	Collaterally Sensitive	Collaterally Sensitive	1	1	1	1	1.21558534819871e-80	3.5607200319427e-18	1.31603231256675e-25	0
1322	A135N	Collaterally Sensitive	Collaterally Sensitive	Collaterally Sensitive	Collaterally Sensitive	0.960258115347684	0.999875986711973	1	1	0.0397418846523158	0.00012401328802684	1.51898621358194e-25	0
1323	A135P	Collaterally Neutral	Collaterally Sensitive	Collaterally Sensitive	Collaterally Sensitive	0.462718704078522	0.945983752259203	1	1	0.537281295921478	0.0540162477407971	2.03181123598336e-18	0
1324	A135Q	Collaterally Sensitive	Collaterally Sensitive	Collaterally Sensitive	Collaterally Sensitive	1	0.999834598057799	0.999769754612781	1	7.41423319282994e-87	0.00016540194220083	0.000230245387219544	3.51672729996479e-23
1325	A135R	Collaterally Sensitive	Collaterally Sensitive	Collaterally Sensitive	Collaterally Sensitive	1	0.999999999995827	0.999999980163015	1	9.82737954320033e-30	4.17290737794813e-12	1.9836984658933e-08	1.04100595150814e-19
1326	A135S	Collaterally Neutral	Collaterally Resistant	Collaterally Neutral	Collaterally Sensitive	0.614571036850317	0.000274296161321241	0.4997385475654	1	0.385428963149683	0.999725703838679	0.5002614524346	2.12558314694098e-151
1327	A135T	Collaterally Neutral	Collaterally Sensitive	Collaterally Sensitive	Collaterally Sensitive	0.64067129459605	0.999999757944449	0.985198285929026	1	0.35932870540395	2.42055551466788e-07	0.0148017140709737	8.36733488565501e-32
1328	A135V	Collaterally Neutral	Collaterally Sensitive	Collaterally Sensitive	Collaterally Sensitive	0.49934367587277	0.923104673126007	0.999987870935867	1	0.50065632412723	0.0768953268739932	1.21290641329207e-05	0
1329	A135W	Collaterally Sensitive	Collaterally Sensitive	Collaterally Sensitive	Collaterally Sensitive	1	0.999996177739906	0.999999999999953	0.999999999999999	1.85861416267739e-21	3.82226009410308e-06	4.67159726015557e-14	1.17023519949037e-15
1330	A135Y	Collaterally Sensitive	Collaterally Sensitive	Collaterally Sensitive	Collaterally Sensitive	1	1	1	1	3.89081027967691e-34	9.4482742082579e-96	0	3.20338516171832e-45
1331	N136A	Collaterally Neutral	Collaterally Sensitive	Collaterally Sensitive	Collaterally Sensitive	0.82225274898132	0.899688335167682	0.999999989979498	1	0.17774725101868	0.100311664832318	1.00205023676707e-08	0
1332	N136C	Collaterally Sensitive	Collaterally Neutral	Collaterally Sensitive	Collaterally Sensitive	0.99192420971147	0.591537544437706	1	1	0.00807579028853026	0.408462455562294	3.62319851718771e-61	2.59565790468806e-29
1333	N136D	Collaterally Neutral	Collaterally Neutral	Collaterally Neutral	Collaterally Sensitive	0.815848065930446	0.675959921544027	0.792588028635449	0.999999984536325	0.184151934069554	0.324040078455973	0.207411971364551	1.54636749388851e-08
1334	N136E	Collaterally Neutral	Collaterally Sensitive	Collaterally Sensitive	Collaterally Sensitive	0.653686832116181	0.99999999905414	0.998720313580104	0.999989138636146	0.346313167883819	9.45860298164387e-10	0.00127968641989583	1.08613638544247e-05
1335	N136F	Collaterally Neutral	Collaterally Sensitive	Collaterally Sensitive	Collaterally Sensitive	0.38526257016366	0.986429791084538	0.999999994050628	0.999999998991156	0.61473742983634	0.013570208915462	5.94937210519296e-09	1.00884441856588e-09
1336	N136G	Collaterally Neutral	Collaterally Sensitive	Collaterally Sensitive	Collaterally Sensitive	0.577766731581871	0.893803047643013	1	1	0.422233268418129	0.106196952356987	1.15770165354589e-17	1.02916312303175e-42
1337	N136H	Collaterally Neutral	Collaterally Neutral	Collaterally Sensitive	Collaterally Sensitive	0.560908658656603	0.501934113287536	1	0.999995720868045	0.439091341343397	0.498065886712464	8.06816881163334e-51	4.2791319547728e-06
1338	N136I	Collaterally Neutral	Collaterally Sensitive	Collaterally Sensitive	Collaterally Sensitive	0.795088403063136	0.928546277654243	0.990484636333861	0.996915679653426	0.204911596936864	0.071453722345757	0.00951536366613897	0.00308432034657382
1339	N136K	Collaterally Neutral	Collaterally Neutral	Collaterally Sensitive	Collaterally Sensitive	0.15679175194174	0.57754963617823	0.997613622325385	0.999999994341033	0.84320824805826	0.42245036382177	0.002386377674615	5.65896727264748e-09
1340	N136L	Collaterally Neutral	Collaterally Sensitive	Collaterally Sensitive	Collaterally Sensitive	0.73676191770129	1	1	0.999999999999986	0.26323808229871	3.48674116024244e-142	1.20347795335961e-83	1.3871644138331e-14
1341	N136M	Collaterally Sensitive	Collaterally Sensitive	Collaterally Sensitive	Collaterally Sensitive	0.999999698527828	0.965828070995127	0.999999992682589	0.999578304719862	3.01472172256104e-07	0.034171929004873	7.31741063307347e-09	0.000421695280137574
1342	N136P	Collaterally Sensitive	Collaterally Sensitive	Collaterally Sensitive	Collaterally Sensitive	1	0.999999999999534	0.999075490072564	0.999994789436269	0	4.66310760360430e-13	0.00092450992743629	5.21056373083508e-06
1343	N136Q	Collaterally Neutral	Collaterally Neutral	Collaterally Sensitive	Collaterally Sensitive	0.61274981761266	0.564136531094252	0.999999999303647	0.999906598993837	0.38725018238734	0.435863468905748	6.96352940526732e-10	9.34010061634255e-05
1344	N136R	Collaterally Neutral	Collaterally Neutral	Collaterally Sensitive	Collaterally Sensitive	0.4680007580481	0.733126529524578	1	0.999781045691246	0.5319992419519	0.266873470475422	1.51640255519466e-18	0.000218954308754095
1345	N136S	Collaterally Sensitive	Collaterally Neutral	Collaterally Sensitive	Collaterally Sensitive	1	0.806726406865868	0.999683913427241	0.998759955785559	1.71145886192974e-125	0.193273593134132	0.000316086572758969	0.00124004421444116
1346	N136T	Collaterally Neutral	Collaterally Neutral	Collaterally Sensitive	Collaterally Sensitive	0.627139766864882	0.649324401516441	0.999888071931343	0.999999511291049	0.372860233135118	0.350675598483559	0.000111928068656651	4.88708951014411e-07
1347	N136V	Collaterally Resistant	Collaterally Sensitive	Collaterally Sensitive	Collaterally Sensitive	0.106861379330339	0.973142618639849	1	0.999999999999999	0.893138620669661	0.0268573813601513	3.13490039358604e-29	1.04785536943695e-15
1348	N136W	Collaterally Sensitive	Collaterally Sensitive	Collaterally Sensitive	Collaterally Sensitive	0.998487733163548	1	1	0.999997012394667	0.00151226683645236	7.88796567065379e-59	4.22493145087888e-16	2.98760533335055e-06
1349	N136Y	Collaterally Neutral	Collaterally Neutral	Collaterally Sensitive	Collaterally Sensitive	0.615589585880665	0.710306274185141	1	0.999745959481644	0.384410414119335	0.289693725814859	5.82203684964355e-28	0.000254040518356001
1350	L137A	Collaterally Neutral	Collaterally Neutral	Collaterally Neutral	Collaterally Sensitive	0.371361060240215	0.270314100324671	0.187800089811359	1	0.628638939759785	0.729685899675329	0.812199910188641	9.90594534076038e-18
1351	L137C	Collaterally Sensitive	Collaterally Neutral	Collaterally Neutral	Collaterally Sensitive	0.952798583598323	0.854141035598368	0.851484175013185	0.999999999997328	0.0472014164016767	0.145858964401632	0.148515824986815	2.67159117788507e-12
1352	L137D	Collaterally Sensitive	Collaterally Sensitive	Collaterally Sensitive	Collaterally Sensitive	1	1	1	1	3.77091340065353e-32	5.59358510005068e-34	2.55322406180315e-40	1.71311715655965e-29
1353	L137E	Collaterally Resistant	Collaterally Neutral	Collaterally Neutral	Collaterally Sensitive	0	0.402347851641635	0.700580010231113	1	1	0.597652148358365	0.299419989768887	0
1354	L137F	Collaterally Neutral	Collaterally Neutral	Collaterally Neutral	Collaterally Sensitive	0.425711067182113	0.372849049076028	0.56570440717546	0.999927227367554	0.574288932817887	0.627150950923972	0.43429559282454	7.2772632446152e-05
1355	L137G	Collaterally Neutral	Collaterally Sensitive	Collaterally Sensitive	Collaterally Sensitive	0.370689912807102	0.997662870859656	0.999999908065025	0.999999999996119	0.629310087192898	0.0023371291403441	9.19349747200764e-08	3.88147870279573e-12
1356	L137H	Collaterally Sensitive	Collaterally Sensitive	Collaterally Sensitive	Collaterally Sensitive	0.885704798944582	0.99999862989017	0.99999830384761	0.999999646622008	0.114295201055418	1.37010983039358e-06	1.69615239031134e-06	3.53377991882957e-07
1357	L137K	Collaterally Neutral	Collaterally Neutral	Collaterally Neutral	Collaterally Sensitive	0.430340419525711	0.821495613008566	0.842188156890295	1	0.569659580474289	0.178504386991434	0.157811843109705	5.03251542994129e-41
1358	L137M	Collaterally Neutral	Collaterally Neutral	Collaterally Neutral	Collaterally Sensitive	0.638201759646878	0.234490083984641	0.599230912798787	1	0.361798240353122	0.765509916015359	0.400769087201213	0
1359	L137N	Collaterally Neutral	Collaterally Neutral	Collaterally Sensitive	Collaterally Sensitive	0.634657599624499	0.470035511799836	0.999999999506049	1	0.365342400375501	0.529964488200164	4.93950915470385e-10	0
1360	L137P	Collaterally Sensitive	Collaterally Sensitive	Collaterally Sensitive	Collaterally Sensitive	1	1	1	0.999999999999997	1.14634742075827e-263	2.10665302865106e-61	5.42779608544132e-128	2.80929085288142e-15
1361	L137Q	Collaterally Resistant	Collaterally Resistant	Collaterally Neutral	Collaterally Sensitive	1.68096436770071e-09	0.114392399788604	0.273715888440547	1	0.999999998319036	0.885607600211396	0.726284111559453	2.70486608642985e-107
1362	L137R	Collaterally Sensitive	Collaterally Resistant	Collaterally Sensitive	Collaterally Sensitive	0.9270484162447	7.7251827157454e-10	0.989633961693523	0.999999985457607	0.0729515837553004	0.999999999227482	0.0103660383064771	1.45423926878402e-08
1363	L137S	Collaterally Neutral	Collaterally Neutral	Collaterally Sensitive	Collaterally Sensitive	0.525585246748335	0.263883502824628	0.99783498656321	0.999999999881333	0.474414753251665	0.736116497175372	0.00216501343679008	1.18666688833877e-10
1364	L137T	Collaterally Sensitive	Collaterally Neutral	Collaterally Resistant	Collaterally Sensitive	0.999784733664874	0.658396757564631	0.0391201490061427	0.999991839359028	0.000215266335126307	0.341603242435369	0.960879850993857	8.16064097199187e-06
1365	L137V	Collaterally Neutral	Collaterally Resistant	Collaterally Neutral	Collaterally Sensitive	0.681980478558855	0.00338103385424759	0.261439113755089	0.991311345963552	0.318019521441145	0.996618966145752	0.738560886244911	0.00868865403644769
1366	L137W	Collaterally Neutral	Collaterally Sensitive	Collaterally Sensitive	Collaterally Sensitive	0.74530760725449	0.971445237957016	1	1	0.25469239274551	0.0285547620429839	6.64483629857565e-48	0
1367	L137Y	Collaterally Neutral	Collaterally Neutral	Collaterally Sensitive	Collaterally Sensitive	0.503474046582836	0.456600210813215	1	0.997896501614914	0.496525953417164	0.543399789186785	0	0.0021034983850865
1368	L138A	Collaterally Neutral	Collaterally Neutral	Collaterally Neutral	Collaterally Sensitive	0.133902636083666	0.786351634137992	0.739624202442208	0.999999941624572	0.866097363916334	0.213648365862008	0.260375797557792	5.83754280686622e-08
1369	L138C	Collaterally Neutral	Collaterally Neutral	Collaterally Sensitive	Collaterally Sensitive	0.628820092656673	0.790483627994125	0.999999998175088	0.999842762946888	0.371179907343327	0.209516372005875	1.82491219800063e-09	0.000157237053111853
1370	L138D	Collaterally Sensitive	Collaterally Sensitive	Collaterally Sensitive	Collaterally Sensitive	1	0.999999998753659	0.999995555783301	1	1.92332994402806e-115	1.24634093525879e-09	4.4442166994576e-06	9.47013340907995e-68
1371	L138F	Collaterally Sensitive	Collaterally Sensitive	Collaterally Sensitive	Collaterally Sensitive	0.98727608145968	1	1	0.999970521354877	0.0127239185403199	1.71626247807224e-21	2.91507602351138e-51	2.94786451235329e-05
1372	L138G	Collaterally Neutral	Collaterally Sensitive	Collaterally Sensitive	Collaterally Sensitive	0.806465179569751	1	0.99999996611631	0.999999985833148	0.193534820430249	1.97990013622375e-36	3.38836899396782e-08	1.41668524024182e-08
1373	L138H	Collaterally Sensitive	Collaterally Sensitive	Collaterally Sensitive	Collaterally Sensitive	0.990326560506519	0.999999999999998	1	0.998830983538373	0.00967343949348067	1.50908708341762e-15	5.11752438424043e-247	0.00116901646162655
1374	L138K	Collaterally Sensitive	Collaterally Sensitive	Collaterally Sensitive	Collaterally Sensitive	1	0.999999999999999	0.999999165534142	0.999999870312496	0	5.81450900110767e-16	8.34465858114205e-07	1.29687503557978e-07
1375	L138M	Collaterally Neutral	Collaterally Sensitive	Collaterally Neutral	Collaterally Sensitive	0.719326844467917	1	0.557083165999122	0.958722164495225	0.280673155532083	0	0.442916834000878	0.0412778355047748
1376	L138N	Collaterally Sensitive	Collaterally Sensitive	Collaterally Sensitive	Collaterally Sensitive	0.971301703247814	1	0.999448363505208	0.999999999839623	0.0286982967521858	1.17038115256671e-39	0.000551636494792195	1.60376893510327e-10
1377	L138P	Collaterally Sensitive	Collaterally Sensitive	Collaterally Sensitive	Collaterally Sensitive	1	1	0.999999978799701	1	2.84967635793405e-93	1.00943748641933e-53	2.12002988632969e-08	2.46661412189391e-286
1378	L138Q	Collaterally Neutral	Collaterally Sensitive	Collaterally Sensitive	Collaterally Sensitive	0.826098662073128	0.999999951118016	0.999999999972688	0.999999999999615	0.173901337926872	4.88819844781627e-08	2.73118945392423e-11	3.84771965937017e-13
1379	L138R	Collaterally Sensitive	Collaterally Sensitive	Collaterally Sensitive	Collaterally Sensitive	1	0.999999999951411	0.99997942666916	0.999999764567715	5.05549419597848e-70	4.85886266566133e-11	2.05733308400493e-05	2.35432285287091e-07
1380	L138S	Collaterally Sensitive	Collaterally Sensitive	Collaterally Sensitive	Collaterally Sensitive	0.890115345545747	0.999999999999996	1	1	0.109884654454253	3.67390339895348e-15	1.94144757776986e-21	0
1381	L138T	Collaterally Neutral	Collaterally Sensitive	Collaterally Sensitive	Collaterally Sensitive	0.769444509329245	0.999999992261813	0.999994213714386	0.999999999990463	0.230555490670754	7.73818718828273e-09	5.7862856140745e-06	9.53691314092935e-12
1382	L138V	Collaterally Neutral	Collaterally Neutral	Collaterally Neutral	Collaterally Sensitive	0.620614981211013	0.766289395990549	0.479165556105004	0.999797240713283	0.379385018788987	0.233710604009451	0.520834443894996	0.000202759286716852
1383	L138W	Collaterally Sensitive	Collaterally Sensitive	Collaterally Sensitive	Collaterally Sensitive	1	1	0.996654549281365	0.999999982076758	6.56999445909504e-180	6.0258131728447e-51	0.00334545071863475	1.79232415775578e-08
1384	L138Y	Collaterally Sensitive	Collaterally Sensitive	Collaterally Sensitive	Collaterally Sensitive	1	0.999999981989351	0.999564042129058	1	1.97074931546967e-25	1.80106487307029e-08	0.000435957870942449	2.26455704218935e-24
1385	L139A	Collaterally Neutral	Collaterally Sensitive	Collaterally Neutral	Collaterally Sensitive	0.748509468552211	0.992210113146903	0.625209712150686	0.999999999999969	0.251490531447789	0.00778988685309664	0.374790287849314	3.10305508073663e-14
1386	L139C	Collaterally Neutral	Collaterally Sensitive	Collaterally Neutral	Collaterally Sensitive	0.702706926916161	0.999779637805877	0.834351956644218	0.999997538792165	0.29729307308384	0.000220362194123175	0.165648043355782	2.46120783516197e-06
1387	L139D	Collaterally Neutral	Collaterally Sensitive	Collaterally Sensitive	Collaterally Sensitive	0.835210202349508	1	1	1	0.164789797650492	9.51423455642335e-83	1.44065182569486e-22	8.78023059386725e-23
1388	L139E	Collaterally Neutral	Collaterally Neutral	Collaterally Sensitive	Collaterally Sensitive	0.248754491869667	0.708327996151297	0.92189001752152	1	0.751245508130333	0.291672003848703	0.0781099824784799	2.0995352070907e-41
1389	L139F	Collaterally Neutral	Collaterally Resistant	Collaterally Neutral	Collaterally Sensitive	0.421835448380103	0.114377877479432	0.28182367157705	0.999813168116206	0.578164551619897	0.885622122520568	0.71817632842295	0.000186831883793887
1390	L139G	Collaterally Neutral	Collaterally Sensitive	Collaterally Sensitive	Collaterally Sensitive	0.662510978432363	0.988852428604696	0.968609596211273	1	0.337489021567637	0.0111475713953044	0.0313904037887274	2.77151422632737e-102
1391	L139H	Collaterally Sensitive	Collaterally Sensitive	Collaterally Sensitive	Collaterally Sensitive	0.99999975219124	0.94787778438444	0.999999908182931	1	2.47808759609518e-07	0.0521222156155598	9.18170689386596e-08	0
1392	L139I	Collaterally Sensitive	Collaterally Neutral	Collaterally Resistant	Collaterally Sensitive	0.953448208312323	0.536951810489803	0.00629441249094886	0.99962952979939	0.0465517916876769	0.463048189510197	0.993705587509051	0.000370470200609546
1393	L139K	Collaterally Neutral	Collaterally Sensitive	Collaterally Sensitive	Collaterally Sensitive	0.802435842435416	0.999999997876394	0.998334964018403	1	0.197564157564584	2.12360629208546e-09	0.00166503598159681	1.86164471874183e-31
1394	L139M	Collaterally Neutral	Collaterally Sensitive	Collaterally Sensitive	Collaterally Sensitive	0.66326787194799	0.936682430829627	0.949418280664995	0.999964795445022	0.33673212805201	0.063317569170373	0.0505817193350048	3.52045549780823e-05
1395	L139N	Collaterally Neutral	Collaterally Neutral	Collaterally Sensitive	Collaterally Sensitive	0.415701814365268	0.291503553691946	0.932270460253375	0.996937690467474	0.584298185634732	0.708496446308054	0.0677295397466246	0.00306230953252581
1396	L139P	Collaterally Sensitive	Collaterally Sensitive	Collaterally Sensitive	Collaterally Sensitive	1	1	1	1	6.12518478024816e-294	5.39906420962378e-32	1.70519881352137e-22	3.55314404858185e-30
1397	L139Q	Collaterally Neutral	Collaterally Sensitive	Collaterally Neutral	Collaterally Sensitive	0.492918083096393	0.967523680879847	0.847995710150435	0.999999127030705	0.507081916903607	0.0324763191201531	0.152004289849566	8.72969294823507e-07
1398	L139R	Collaterally Sensitive	Collaterally Sensitive	Collaterally Sensitive	Collaterally Sensitive	0.998764781040025	1	1	0.999999999999999	0.00123521895997461	0	4.40857489186017e-20	8.36634926095014e-16
1399	L139S	Collaterally Neutral	Collaterally Neutral	Collaterally Neutral	Collaterally Sensitive	0.458129459504498	0.650323693852465	0.492881034473344	0.999999997614809	0.541870540495502	0.349676306147535	0.507118965526656	2.38519145240462e-09
1400	L139T	Collaterally Sensitive	Collaterally Neutral	Collaterally Sensitive	Collaterally Sensitive	0.998160040245504	0.873529446354792	0.952619627611949	0.999376800830582	0.00183995975449556	0.126470553645208	0.0473803723880506	0.000623199169417725
1401	L139V	Collaterally Neutral	Collaterally Neutral	Collaterally Neutral	Collaterally Sensitive	0.186965903477082	0.273883959708521	0.465626441957723	0.9994250508663	0.813034096522918	0.726116040291479	0.534373558042277	0.000574949133700497
1402	L139W	Collaterally Neutral	Collaterally Neutral	Collaterally Sensitive	Collaterally Sensitive	0.643888218878117	0.653174324273634	0.996327649390854	0.999999285475848	0.356111781121884	0.346825675726366	0.00367235060914639	7.14524151906964e-07
1403	L139Y	Collaterally Neutral	Collaterally Sensitive	Collaterally Sensitive	Collaterally Sensitive	0.386495535458278	0.960515676444183	0.999999999999971	0.998209049981699	0.613504464541722	0.0394843235558171	2.91303070707193e-14	0.00179095001830059
1404	T140C	Collaterally Resistant	Collaterally Neutral	Collaterally Resistant	Collaterally Sensitive	9.59493262620015e-10	0.176115321592507	0	0.881960456410379	0.999999999040507	0.823884678407493	1	0.118039543589621
1405	T140E	Collaterally Neutral	Collaterally Resistant	Collaterally Resistant	Collaterally Neutral	0.409396063078585	0.00109899826109816	0.0490860963723877	0.224929918372944	0.590603936921415	0.998901001738902	0.950913903627612	0.775070081627056
1406	T140F	Collaterally Neutral	Collaterally Neutral	Collaterally Neutral	Collaterally Sensitive	0.791704698176808	0.605024954791403	0.673733723945021	0.90065296514427	0.208295301823192	0.394975045208597	0.326266276054979	0.0993470348557302
1407	T140H	Collaterally Neutral	Collaterally Resistant	Collaterally Neutral	Collaterally Neutral	0.614814684264209	0.00940890514913684	0.265604058297129	0.63279956841232	0.385185315735791	0.990591094850863	0.734395941702871	0.36720043158768
1408	T140I	Collaterally Resistant	Collaterally Resistant	Collaterally Resistant	Collaterally Sensitive	0.0205872202560546	3.1663042188157e-09	0.0759754883337115	0.978722997253245	0.979412779743945	0.999999996833696	0.924024511666289	0.0212770027467552
1409	T140L	Collaterally Neutral	Collaterally Resistant	Collaterally Resistant	Collaterally Neutral	0.406666557200645	0	0	0.742606141413992	0.593333442799355	1	1	0.257393858586009
1410	T140P	Collaterally Neutral	Collaterally Neutral	Collaterally Neutral	Collaterally Sensitive	0.721998413400708	0.206537926217909	0.293744659223179	0.999999999972165	0.278001586599292	0.793462073782091	0.706255340776821	2.78352620349256e-11
1411	T140Q	Collaterally Neutral	Collaterally Resistant	Collaterally Resistant	Collaterally Neutral	0.734067566929524	0.0160639229984015	0.103204644130331	0.70539112666197	0.265932433070476	0.983936077001598	0.896795355869669	0.29460887333803
1412	T140V	Collaterally Neutral	Collaterally Neutral	Collaterally Neutral	Collaterally Sensitive	0.392324208279096	0.444230168979163	0.335345571379921	0.997975359129846	0.607675791720904	0.555769831020837	0.664654428620079	0.00202464087015357
1413	T141C	Collaterally Neutral	Collaterally Neutral	Collaterally Neutral	Collaterally Sensitive	0.598003709987609	0.473541575999763	0.52750742528855	0.936783920987667	0.401996290012391	0.526458424000237	0.47249257471145	0.0632160790123327
1414	T141F	Collaterally Sensitive	Collaterally Neutral	Collaterally Neutral	Collaterally Sensitive	0.975883801163987	0.87209158764047	0.724089198617263	0.99999999999995	0.0241161988360131	0.12790841235953	0.275910801382737	4.95427392235002e-14
1415	T141P	Collaterally Neutral	Collaterally Neutral	Collaterally Sensitive	Collaterally Sensitive	0.726419657291117	0.638139989483757	0.999209562396062	1	0.273580342708883	0.361860010516243	0.000790437603938063	1.83672700473567e-76
1416	T141R	Collaterally Neutral	Collaterally Neutral	Collaterally Neutral	Collaterally Sensitive	0.689466279482909	0.509558205548273	0.582264945855144	0.92780671265834	0.310533720517091	0.490441794451727	0.417735054144856	0.0721932873416604
1417	T141V	Collaterally Neutral	Collaterally Neutral	Collaterally Neutral	Collaterally Neutral	0.762404055482635	0.726807333289981	0.62840607645245	0.688521980423928	0.237595944517365	0.273192666710019	0.37159392354755	0.311478019576072
1418	T141W	Collaterally Neutral	Collaterally Neutral	Collaterally Neutral	Collaterally Sensitive	0.781523848852261	0.673872792477832	0.693016653220483	1	0.218476151147739	0.326127207522168	0.306983346779517	1.22089773392743e-40
1419	T141Y	Collaterally Neutral	Collaterally Sensitive	Collaterally Neutral	Collaterally Sensitive	0.656856770933266	1	0.635404447783395	0.999999999999542	0.343143229066734	6.77595795242003e-124	0.364595552216605	4.57571926728149e-13
1420	I142A	Collaterally Resistant	Collaterally Resistant	Collaterally Resistant	Collaterally Sensitive	0.00870545171742398	0.0862305894050197	0.0384699641109694	1	0.991294548282576	0.91376941059498	0.961530035889031	1.24850227472517e-17
1421	I142C	Collaterally Neutral	Collaterally Neutral	Collaterally Neutral	Collaterally Sensitive	0.187546360470255	0.251936335095173	0.376283630480142	0.999999999985044	0.812453639529745	0.748063664904827	0.623716369519858	1.49562483018936e-11
1422	I142D	Collaterally Sensitive	Collaterally Sensitive	Collaterally Sensitive	Collaterally Sensitive	0.893696907853641	0.999998126504976	1	1	0.106303092146359	1.87349502443947e-06	3.34730981781956e-76	2.59571616608765e-16
1423	I142G	Collaterally Neutral	Collaterally Neutral	Collaterally Sensitive	Collaterally Sensitive	0.410334995812936	0.540364136821148	0.970936933079275	0.999987662593412	0.589665004187064	0.459635863178851	0.0290630669207251	1.23374065884666e-05
1424	I142H	Collaterally Neutral	Collaterally Neutral	Collaterally Sensitive	Collaterally Sensitive	0.325200880067253	0.744452216790352	0.994040084789382	0.999957508539509	0.674799119932747	0.255547783209648	0.00595991521061828	4.24914604910633e-05
1425	I142K	Collaterally Neutral	Collaterally Sensitive	Collaterally Sensitive	Collaterally Sensitive	0.173636594401604	0.994519589076632	1	0.99999999999846	0.826363405598396	0.00548041092336776	2.97579718238393e-145	1.53959462405793e-12
1426	I142P	Collaterally Sensitive	Collaterally Sensitive	Collaterally Sensitive	Collaterally Sensitive	0.944832329180711	0.999999964354634	1	1	0.0551676708192894	3.56453663366753e-08	0	0
1427	I142Q	Collaterally Neutral	Collaterally Neutral	Collaterally Neutral	Collaterally Sensitive	0.426309915294707	0.267786598231974	0.58942633885313	1	0.573690084705293	0.732213401768026	0.41057366114687	6.48774162812865e-29
1428	I142R	Collaterally Sensitive	Collaterally Sensitive	Collaterally Sensitive	Collaterally Sensitive	0.946030695043371	0.975649081342754	0.999999999999999	0.999986047634219	0.053969304956629	0.0243509186572463	6.90208975423822e-16	1.39523657807749e-05
1429	I142S	Collaterally Neutral	Collaterally Neutral	Collaterally Neutral	Collaterally Sensitive	0.592224905709133	0.682965817115118	0.828527784925162	0.999999999999981	0.407775094290867	0.317034182884882	0.171472215074838	1.87435590584638e-14
1430	I142T	Collaterally Sensitive	Collaterally Neutral	Collaterally Neutral	Collaterally Sensitive	0.940079405396152	0.256285154106314	0.275326379828001	0.999999993601754	0.0599205946038482	0.743714845893686	0.724673620171999	6.3982463357691e-09
1431	I142W	Collaterally Neutral	Collaterally Neutral	Collaterally Sensitive	Collaterally Sensitive	0.580937554264421	0.431069496152178	0.893477612643796	0.99999999999998	0.419062445735579	0.568930503847822	0.106522387356204	2.03407616256163e-14
1432	I142Y	Collaterally Sensitive	Collaterally Neutral	Collaterally Sensitive	Collaterally Sensitive	0.99797771990881	0.717490750015945	0.999999998843793	0.996164690291933	0.00202228009119028	0.282509249984055	1.15620706333533e-09	0.00383530970806706
1433	G143A	Collaterally Neutral	Collaterally Neutral	Collaterally Neutral	Collaterally Sensitive	0.187710908063929	0.485386517030811	0.50449431620479	1	0.812289091936071	0.514613482969189	0.49550568379521	1.07118814706427e-28
1434	G143C	Collaterally Neutral	Collaterally Neutral	Collaterally Neutral	Collaterally Sensitive	0.258313153861808	0.58633626065446	0.775346061667514	1	0.741686846138192	0.41366373934554	0.224653938332486	1.20764800352682e-154
1435	G143D	Collaterally Neutral	Collaterally Neutral	Collaterally Resistant	Collaterally Sensitive	0.347166459264376	0.660411856943158	6.86352471523932e-08	0.928029686781497	0.652833540735624	0.339588143056842	0.999999931364753	0.071970313218503
1436	G143E	Collaterally Neutral	Collaterally Sensitive	Collaterally Neutral	Collaterally Sensitive	0.327388944867163	0.938644848832895	0.600182333458426	1	0.672611055132837	0.0613551511671053	0.399817666541574	4.67114044650069e-55
1437	G143F	Collaterally Neutral	Collaterally Neutral	Collaterally Sensitive	Collaterally Sensitive	0.295978429294911	0.503191639499936	0.967012725672184	0.999982696651412	0.704021570705089	0.496808360500064	0.032987274327816	1.73033485882062e-05
1438	G143H	Collaterally Neutral	Collaterally Neutral	Collaterally Neutral	Collaterally Sensitive	0.302578534089298	0.191638678296951	0.265704417987615	1	0.697421465910702	0.808361321703049	0.734295582012385	0
1439	G143I	Collaterally Neutral	Collaterally Neutral	Collaterally Neutral	Collaterally Sensitive	0.464418847069827	0.510098119803738	0.842992079357691	0.999999999999999	0.535581152930173	0.489901880196262	0.157007920642309	1.1957954847538e-15
1440	G143K	Collaterally Resistant	Collaterally Neutral	Collaterally Neutral	Collaterally Sensitive	0.00499270458095624	0.541166616082315	0.581703879982201	1	0.995007295419044	0.458833383917685	0.418296120017799	1.78747677432942e-195
1441	G143L	Collaterally Resistant	Collaterally Neutral	Collaterally Neutral	Collaterally Sensitive	0.0524769641654634	0.749895039770763	0.760877823167448	1	0.947523035834537	0.250104960229237	0.239122176832552	2.94493258521449e-42
1442	G143M	Collaterally Neutral	Collaterally Neutral	Collaterally Neutral	Collaterally Sensitive	0.352566625198937	0.781899657979329	0.144793079463529	1	0.647433374801063	0.218100342020671	0.855206920536471	1.5447243713117e-59
1443	G143N	Collaterally Neutral	Collaterally Neutral	Collaterally Sensitive	Collaterally Sensitive	0.489654674112306	0.796299647886907	0.893185859006461	1	0.510345325887694	0.203700352113093	0.10681414099354	4.49794462294638e-39
1444	G143P	Collaterally Neutral	Collaterally Sensitive	Collaterally Sensitive	Collaterally Sensitive	0.197864864814632	0.904672970041824	0.999996885626705	1	0.802135135185368	0.0953270299581756	3.11437329505e-06	7.82400325443674e-59
1445	G143Q	Collaterally Neutral	Collaterally Sensitive	Collaterally Neutral	Collaterally Sensitive	0.364393039231437	0.999999999999998	0.471905034593676	0.997035149148611	0.635606960768563	2.13838268126194e-15	0.528094965406324	0.0029648508513889
1446	G143R	Collaterally Neutral	Collaterally Sensitive	Collaterally Neutral	Collaterally Sensitive	0.138644401316427	0.999999163425158	0.469992783545647	1	0.861355598683573	8.36574841835607e-07	0.530007216454353	1.84103201498578e-50
1447	G143S	Collaterally Resistant	Collaterally Resistant	Collaterally Neutral	Collaterally Sensitive	2.10830875753132e-05	0.0786155159506865	0.349506323164138	1	0.999978916912425	0.921384484049314	0.650493676835862	1.47401152932349e-21
1448	G143T	Collaterally Neutral	Collaterally Neutral	Collaterally Neutral	Collaterally Sensitive	0.157442871280485	0.723985575221828	0.77318222296535	0.999999999999999	0.842557128719515	0.276014424778172	0.22681777703465	5.76247101667789e-16
1449	G143V	Collaterally Sensitive	Collaterally Neutral	Collaterally Neutral	Collaterally Sensitive	0.999999043774827	0.474820675406851	0.845762148237099	0.999994424567207	9.56225172595508e-07	0.525179324593149	0.154237851762901	5.57543279301575e-06
1450	G143W	Collaterally Neutral	Collaterally Neutral	Collaterally Sensitive	Collaterally Sensitive	0.386243543979964	0.807691195196633	0.999998590111275	1	0.613756456020036	0.192308804803367	1.40988872507766e-06	0
1451	G143Y	Collaterally Neutral	Collaterally Neutral	Collaterally Neutral	Collaterally Sensitive	0.566782351394237	0.425349704423092	0.78670793108778	0.999616899316727	0.433217648605763	0.574650295576908	0.213292068912219	0.000383100683272652
1452	G144A	Collaterally Sensitive	Collaterally Neutral	Collaterally Sensitive	Collaterally Sensitive	0.921465545409551	0.515467149382362	0.901270393212365	0.999999999815857	0.078534454590449	0.484532850617638	0.0987296067876348	1.84143515004713e-10
1453	G144C	Collaterally Neutral	Collaterally Sensitive	Collaterally Sensitive	Collaterally Sensitive	0.537495988785702	0.997919578663249	0.996340399475868	0.999990223367423	0.462504011214298	0.0020804213367513	0.00365960052413155	9.77663257708391e-06
1454	G144D	Collaterally Neutral	Collaterally Resistant	Collaterally Neutral	Collaterally Sensitive	0.795247683028978	0.0660426102398204	0.365934846055182	0.988853934947394	0.204752316971022	0.93395738976018	0.634065153944818	0.0111460650526059
1455	G144E	Collaterally Sensitive	Collaterally Neutral	Collaterally Neutral	Collaterally Sensitive	0.997993812943536	0.693987213362507	0.862578543138643	0.997985689478973	0.00200618705646382	0.306012786637493	0.137421456861357	0.00201431052102723
1456	G144F	Collaterally Neutral	Collaterally Sensitive	Collaterally Sensitive	Collaterally Sensitive	0.614277662893921	1	0.999999999999808	1	0.385722337106079	5.96363974527599e-41	1.91656595373804e-13	6.81080212867987e-42
1457	G144H	Collaterally Neutral	Collaterally Sensitive	Collaterally Sensitive	Collaterally Sensitive	0.758484206062786	0.979623064550178	0.898998277496397	1	0.241515793937214	0.0203769354498218	0.101001722503603	0
1458	G144I	Collaterally Neutral	Collaterally Sensitive	Collaterally Sensitive	Collaterally Sensitive	0.813690762554902	0.99994356673748	0.999999999720301	0.999999994431525	0.186309237445098	5.64332625197333e-05	2.79698772778964e-10	5.56847532751664e-09
1459	G144K	Collaterally Sensitive	Collaterally Sensitive	Collaterally Sensitive	Collaterally Sensitive	0.889861291905331	0.99958668379412	0.999937591855083	1	0.110138708094669	0.000413316205879672	6.24081449172359e-05	1.31708524164469e-49
1460	G144L	Collaterally Sensitive	Collaterally Sensitive	Collaterally Sensitive	Collaterally Sensitive	0.999999999999597	1	1	0.999999217641129	4.03056548607031e-13	2.11389172235327e-17	4.65852986801768e-28	7.82358870834035e-07
1461	G144M	Collaterally Neutral	Collaterally Sensitive	Collaterally Sensitive	Collaterally Sensitive	0.253346075942717	0.914205632667583	0.987410884733523	0.999999999988237	0.746653924057283	0.0857943673324167	0.0125891152664773	1.17634982924718e-11
1462	G144N	Collaterally Resistant	Collaterally Neutral	Collaterally Neutral	Collaterally Sensitive	0.031601417133322	0.674351262602182	0.570195585436756	0.999999999995594	0.968398582866678	0.325648737397818	0.429804414563244	4.4061844536395e-12
1463	G144P	Collaterally Sensitive	Collaterally Sensitive	Collaterally Sensitive	Collaterally Sensitive	0.991094773741672	0.993055184657198	0.999999999541406	1	0.00890522625832794	0.00694481534280236	4.58594197452017e-10	7.70359672581395e-17
1464	G144Q	Collaterally Neutral	Collaterally Resistant	Collaterally Sensitive	Collaterally Sensitive	0.440709082046201	0.00142925542706562	0.88699012178076	0.999934912432131	0.559290917953799	0.998570744572934	0.11300987821924	6.50875678686259e-05
1465	G144R	Collaterally Neutral	Collaterally Sensitive	Collaterally Sensitive	Collaterally Sensitive	0.776825694044853	0.999999999138792	0.999995044786105	1	0.223174305955147	8.61207989933681e-10	4.95521389478678e-06	7.86193824352237e-175
1466	G144S	Collaterally Sensitive	Collaterally Neutral	Collaterally Neutral	Collaterally Sensitive	0.996326947316053	0.711156582114774	0.781047226770394	0.999993006344437	0.00367305268394697	0.288843417885226	0.218952773229606	6.99365556314423e-06
1467	G144T	Collaterally Sensitive	Collaterally Neutral	Collaterally Neutral	Collaterally Sensitive	0.945544384699401	0.614998566096295	0.832054483308784	0.999999994634351	0.054455615300599	0.385001433903705	0.167945516691216	5.36564909335445e-09
1468	G144V	Collaterally Sensitive	Collaterally Sensitive	Collaterally Sensitive	Collaterally Sensitive	0.916453197766756	1	0.999999903027943	0.999999999999143	0.0835468022332441	2.2733103340186e-100	9.69720568802697e-08	8.56857371105826e-13
1469	G144W	Collaterally Neutral	Collaterally Sensitive	Collaterally Sensitive	Collaterally Sensitive	0.791609078081732	0.999999999996283	0.999988510764256	0.999999999210913	0.208390921918268	3.71689369273158e-12	1.1489235744474e-05	7.89087397823665e-10
1470	G144Y	Collaterally Neutral	Collaterally Sensitive	Collaterally Sensitive	Collaterally Sensitive	0.752224216019742	0.92913024386981	1	0.999999999999999	0.247775783980258	0.0708697561301901	0	6.77523042792293e-16
1471	P145A	Collaterally Neutral	Collaterally Neutral	Collaterally Sensitive	Collaterally Sensitive	0.243586720485506	0.815487681397159	0.999831096972096	1	0.756413279514494	0.184512318602841	0.000168903027904295	0
1472	P145C	Collaterally Neutral	Collaterally Neutral	Collaterally Neutral	Collaterally Sensitive	0.407952372946997	0.546795386505591	0.729710591121121	0.999139426083552	0.592047627053003	0.453204613494409	0.270289408878879	0.000860573916448009
1473	P145D	Collaterally Resistant	Collaterally Sensitive	Collaterally Sensitive	Collaterally Sensitive	0.00687087252289065	0.922920981349378	0.998624128292555	1	0.993129127477109	0.0770790186506221	0.0013758717074455	7.57042684906894e-24
1474	P145E	Collaterally Neutral	Collaterally Sensitive	Collaterally Neutral	Collaterally Sensitive	0.152185816413395	0.958830793973464	0.872723305109944	0.999999905459133	0.847814183586605	0.041169206026536	0.127276694890056	9.45408674344873e-08
1475	P145F	Collaterally Neutral	Collaterally Neutral	Collaterally Neutral	Collaterally Sensitive	0.377869348544748	0.762713100056863	0.874624624764778	0.999999970453859	0.622130651455252	0.237286899943137	0.125375375235222	2.95461407672724e-08
1476	P145G	Collaterally Neutral	Collaterally Neutral	Collaterally Neutral	Collaterally Sensitive	0.216816274629996	0.827440061717948	0.749540252875739	0.999999997173754	0.783183725370004	0.172559938282052	0.250459747124261	2.8262461735515e-09
1477	P145K	Collaterally Neutral	Collaterally Sensitive	Collaterally Sensitive	Collaterally Sensitive	0.537871128036879	1	0.999999904260689	0.999729915079228	0.462128871963121	1.01707314407376e-24	9.5739310706093e-08	0.000270084920772066
1478	P145L	Collaterally Resistant	Collaterally Neutral	Collaterally Sensitive	Collaterally Sensitive	0.00690235487208191	0.751956222909174	0.909815917392687	0.999529998386931	0.993097645127918	0.248043777090826	0.090184082607313	0.000470001613069303
1479	P145N	Collaterally Neutral	Collaterally Sensitive	Collaterally Neutral	Collaterally Sensitive	0.155204593946865	0.999474333371526	0.873316860573096	1	0.844795406053135	0.00052566662847427	0.126683139426904	0
1480	P145Q	Collaterally Resistant	Collaterally Neutral	Collaterally Neutral	Collaterally Sensitive	0.00034831613517472	0.407357659460993	0.451641214405714	0.999999998776121	0.999651683864825	0.592642340539007	0.548358785594286	1.22387866176406e-09
1481	P145R	Collaterally Neutral	Collaterally Sensitive	Collaterally Sensitive	Collaterally Sensitive	0.423620009177252	0.947419562920054	0.999999999800037	0.997440161490776	0.576379990822748	0.0525804370799459	1.99962788696841e-10	0.00255983850922354
1482	P145S	Collaterally Neutral	Collaterally Neutral	Collaterally Neutral	Collaterally Sensitive	0.475999886410073	0.847458687215754	0.604104918427503	1	0.524000113589927	0.152541312784246	0.395895081572497	7.711620209374e-45
1483	P145T	Collaterally Resistant	Collaterally Neutral	Collaterally Neutral	Collaterally Sensitive	4.09885569485624e-06	0.407905975562942	0.494450287869442	0.999999999760175	0.999995901144305	0.592094024437058	0.505549712130558	2.3982469721011e-10
1484	P145V	Collaterally Neutral	Collaterally Sensitive	Collaterally Sensitive	Collaterally Sensitive	0.240531165394322	0.989423590538919	0.999999999999999	1	0.759468834605678	0.0105764094610812	1.16301789845134e-15	0
1485	P145W	Collaterally Neutral	Collaterally Sensitive	Collaterally Sensitive	Collaterally Sensitive	0.34314570589618	0.921616006373233	0.990893280296728	0.999999999985238	0.65685429410382	0.0783839936267669	0.00910671970327168	1.47623289903293e-11
1486	P145Y	Collaterally Neutral	Collaterally Sensitive	Collaterally Sensitive	Collaterally Sensitive	0.182686414016174	0.955598660111239	0.991218565301724	0.999504153319172	0.817313585983826	0.0444013398887615	0.00878143469827567	0.000495846680828055
1487	K146A	Collaterally Sensitive	Collaterally Neutral	Collaterally Neutral	Collaterally Sensitive	1	0.484804288919011	0.644338515240183	0.999999881052652	0	0.515195711080989	0.355661484759817	1.18947348369631e-07
1488	K146C	Collaterally Sensitive	Collaterally Neutral	Collaterally Neutral	Collaterally Sensitive	1	0.872399445558279	0.741528165038989	0.999996997053723	8.39036430092204e-39	0.127600554441721	0.258471834961011	3.0029462768611e-06
1489	K146D	Collaterally Sensitive	Collaterally Neutral	Collaterally Neutral	Collaterally Neutral	0.97471562131286	0.576067751532098	0.873259072085739	0.858816183702666	0.0252843786871395	0.423932248467902	0.126740927914261	0.141183816297334
1490	K146E	Collaterally Neutral	Collaterally Neutral	Collaterally Sensitive	Collaterally Neutral	0.706356868123557	0.538440743612376	0.922195838738998	0.665773213903611	0.293643131876443	0.461559256387624	0.0778041612610024	0.334226786096389
1491	K146F	Collaterally Neutral	Collaterally Neutral	Collaterally Neutral	Collaterally Sensitive	0.446257758558676	0.377301244659833	0.545172846492041	0.984870887805646	0.553742241441324	0.622698755340167	0.454827153507959	0.0151291121943535
1492	K146G	Collaterally Neutral	Collaterally Neutral	Collaterally Sensitive	Collaterally Neutral	0.859984897293815	0.546563728687395	1	0.706187819419049	0.140015102706185	0.453436271312605	3.56302987747236e-22	0.293812180580951
1493	K146H	Collaterally Neutral	Collaterally Resistant	Collaterally Resistant	Collaterally Neutral	0.549846924934275	0	0.101844141712664	0.579819960007915	0.450153075065725	1	0.898155858287336	0.420180039992085
1494	K146L	Collaterally Sensitive	Collaterally Neutral	Collaterally Neutral	Collaterally Sensitive	0.998117159144895	0.849668067283577	0.785212680557853	0.999999999999899	0.00188284085510489	0.150331932716423	0.214787319442147	1.00746280132088e-13
1495	K146M	Collaterally Neutral	Collaterally Neutral	Collaterally Sensitive	Collaterally Sensitive	0.769617629131454	0.656184803275969	0.97028436191607	0.885792114822509	0.230382370868546	0.343815196724031	0.0297156380839302	0.114207885177491
1496	K146N	Collaterally Sensitive	Collaterally Neutral	Collaterally Neutral	Collaterally Neutral	0.905317457673027	0.266383274209967	0.694148268213171	0.536186574723226	0.0946825423269731	0.733616725790033	0.305851731786829	0.463813425276774
1497	K146P	Collaterally Sensitive	Collaterally Neutral	Collaterally Sensitive	Collaterally Sensitive	0.964916846726991	0.692708511565549	0.951806243827867	0.999913768604248	0.0350831532730093	0.307291488434451	0.048193756172133	8.6231395751827e-05
1498	K146Q	Collaterally Sensitive	Collaterally Neutral	Collaterally Neutral	Collaterally Neutral	0.901263723298118	0.24877175216744	0.476321480194657	0.65655675565592	0.0987362767018821	0.75122824783256	0.523678519805343	0.34344324434408
1499	K146R	Collaterally Sensitive	Collaterally Neutral	Collaterally Sensitive	Collaterally Sensitive	0.999943122392181	0.570739328467618	0.997339322826421	0.998025745194215	5.68776078189413e-05	0.429260671532382	0.00266067717357877	0.00197425480578512
1500	K146S	Collaterally Sensitive	Collaterally Neutral	Collaterally Sensitive	Collaterally Sensitive	0.996763440706754	0.354477432761581	0.999999539099562	0.999882872246013	0.00323655929324629	0.645522567238419	4.60900437847815e-07	0.000117127753987085
1501	K146T	Collaterally Sensitive	Collaterally Resistant	Collaterally Neutral	Collaterally Neutral	0.920832329709623	0.0409858138621197	0.702595894153775	0.846176609612417	0.0791676702903769	0.95901418613788	0.297404105846225	0.153823390387583
1502	K146W	Collaterally Sensitive	Collaterally Neutral	Collaterally Neutral	Collaterally Sensitive	0.964897952240989	0.379338165144537	0.575144698671171	1	0.0351020477590114	0.620661834855463	0.424855301328829	1.84491821029491e-18
1503	K146Y	Collaterally Sensitive	Collaterally Neutral	Collaterally Sensitive	Collaterally Sensitive	1	0.445018233611599	0.999432538714104	0.9948260070941	0	0.554981766388401	0.000567461285896286	0.00517399290590043
1504	E147I	Collaterally Neutral	Collaterally Neutral	Collaterally Neutral	Collaterally Sensitive	0.342360162360177	0.577374380444001	0.397662675616564	1	0.657639837639823	0.422625619555999	0.602337324383436	0
1505	L148A	Collaterally Neutral	Collaterally Sensitive	Collaterally Resistant	Collaterally Sensitive	0.842731708538023	1	0.00893127499678958	1	0.157268291461977	3.50226140661407e-27	0.99106872500321	0
1506	L148C	Collaterally Neutral	Collaterally Neutral	Collaterally Neutral	Collaterally Sensitive	0.502461333115015	0.707237060264649	0.79922691398356	1	0.497538666884985	0.292762939735351	0.20077308601644	2.12291573418779e-171
1507	L148D	Collaterally Sensitive	Collaterally Sensitive	Collaterally Sensitive	Collaterally Sensitive	1	0.999938181077462	0.999015675638645	1	1.09550357465765e-16	6.18189225377343e-05	0.000984324361355433	2.62087273753718e-20
1508	L148E	Collaterally Neutral	Collaterally Sensitive	Collaterally Sensitive	Collaterally Sensitive	0.711598363317947	0.999999999468553	0.999999861832231	1	0.288401636682053	5.31446926459649e-10	1.38167768679365e-07	1.13243894006065e-66
1509	L148G	Collaterally Neutral	Collaterally Sensitive	Collaterally Sensitive	Collaterally Sensitive	0.780492342557471	0.998702670500882	0.999992845731506	0.999999997136404	0.219507657442529	0.00129732949911841	7.15426849378833e-06	2.86359646667281e-09
1510	L148H	Collaterally Sensitive	Collaterally Sensitive	Collaterally Sensitive	Collaterally Sensitive	0.950403528940055	0.967078341847164	0.999999163520443	1	0.0495964710599449	0.0329216581528362	8.36479556790176e-07	2.46663916714415e-25
1511	L148I	Collaterally Neutral	Collaterally Neutral	Collaterally Neutral	Collaterally Neutral	0.592702402091643	0.247692139578657	0.790378193182532	0.835783278345531	0.407297597908357	0.752307860421343	0.209621806817468	0.164216721654469
1512	L148K	Collaterally Sensitive	Collaterally Sensitive	Collaterally Sensitive	Collaterally Sensitive	0.974855240289201	1	0.999999999999998	0.999999999999843	0.0251447597107995	0	2.18758505306793e-15	1.57376184706169e-13
1513	L148M	Collaterally Sensitive	Collaterally Sensitive	Collaterally Sensitive	Collaterally Sensitive	0.888744143924532	0.905515696638393	0.9847660324798	1	0.111255856075468	0.0944843033616068	0.0152339675201998	0
1514	L148N	Collaterally Resistant	Collaterally Sensitive	Collaterally Sensitive	Collaterally Sensitive	0.0794285218955129	0.98974509339604	1	0.999999999999715	0.920571478104487	0.0102549066039603	8.19190061377113e-108	2.85309387030858e-13
1515	L148P	Collaterally Sensitive	Collaterally Sensitive	Collaterally Sensitive	Collaterally Sensitive	0.999875533934342	1	1	0.999996398537486	0.000124466065658354	2.28932442198976e-61	3.35298423277513e-55	3.60146251396122e-06
1516	L148Q	Collaterally Neutral	Collaterally Neutral	Collaterally Sensitive	Collaterally Sensitive	0.813774667301734	0.764457864661158	0.924535680405542	0.999995961093255	0.186225332698266	0.235542135338842	0.0754643195944582	4.03890674546632e-06
1517	L148R	Collaterally Sensitive	Collaterally Sensitive	Collaterally Sensitive	Collaterally Sensitive	0.999999999999999	1	0.99999999915413	0.999887950375498	1.07714984750437e-15	4.98499337193372e-204	8.4586963104658e-10	0.000112049624501881
1518	L148S	Collaterally Neutral	Collaterally Sensitive	Collaterally Sensitive	Collaterally Sensitive	0.823894494527516	0.999999999883703	0.999999999999999	1	0.176105505472484	1.16297131610292e-10	6.5095043825295e-16	0
1519	L148T	Collaterally Neutral	Collaterally Sensitive	Collaterally Sensitive	Collaterally Sensitive	0.542685594733824	0.999992926233136	0.958657433779097	0.999999999999986	0.457314405266175	7.07376686449151e-06	0.0413425662209029	1.4366717540716e-14
1520	L148V	Collaterally Neutral	Collaterally Sensitive	Collaterally Sensitive	Collaterally Sensitive	0.707243670431219	0.999999999999708	1	1	0.292756329568781	2.91871497779356e-13	4.91118063549705e-38	0
1521	L148Y	Collaterally Sensitive	Collaterally Sensitive	Collaterally Neutral	Collaterally Sensitive	0.901149664199819	1	0.864821430138252	0.99898707904471	0.0988503358001805	1.19072578927707e-45	0.135178569861748	0.00101292095528977
1522	T149A	Collaterally Neutral	Collaterally Neutral	Collaterally Sensitive	Collaterally Sensitive	0.435596528361743	0.552187874359051	0.891086441953109	1	0.564403471638257	0.447812125640949	0.108913558046891	0
1523	T149C	Collaterally Sensitive	Collaterally Neutral	Collaterally Neutral	Collaterally Sensitive	0.975782654527035	0.70197589968831	0.674532624014219	0.999999999999981	0.0242173454729647	0.29802410031169	0.325467375985781	1.93617942272381e-14
1524	T149D	Collaterally Neutral	Collaterally Neutral	Collaterally Neutral	Collaterally Sensitive	0.53044026596679	0.585149575994656	0.414188860103555	1	0.46955973403321	0.414850424005344	0.585811139896445	2.09774467322062e-21
1525	T149E	Collaterally Neutral	Collaterally Neutral	Collaterally Neutral	Collaterally Sensitive	0.219200430215939	0.603093425569119	0.601450831230832	1	0.780799569784061	0.396906574430881	0.398549168769168	3.52831578356552e-29
1526	T149G	Collaterally Neutral	Collaterally Neutral	Collaterally Neutral	Collaterally Sensitive	0.398807594126449	0.477604906811423	0.632642172791471	1	0.601192405873551	0.522395093188577	0.367357827208529	4.43768332701959e-207
1527	T149H	Collaterally Neutral	Collaterally Sensitive	Collaterally Sensitive	Collaterally Sensitive	0.797108862983917	1	0.999999999999993	1	0.202891137016082	4.35451392814357e-36	6.94652651270343e-15	1.96216618443075e-23
1528	T149I	Collaterally Neutral	Collaterally Neutral	Collaterally Neutral	Collaterally Sensitive	0.246927870900031	0.342284902085614	0.462873108363328	0.999980834027511	0.753072129099969	0.657715097914386	0.537126891636672	1.91659724893588e-05
1529	T149K	Collaterally Sensitive	Collaterally Neutral	Collaterally Sensitive	Collaterally Sensitive	0.947207560753872	0.722579719023665	0.999690398340586	1	0.0527924392461284	0.277420280976335	0.000309601659413467	0
1530	T149L	Collaterally Resistant	Collaterally Neutral	Collaterally Neutral	Collaterally Sensitive	0	0.707350508322587	0.738522384684864	1	1	0.292649491677413	0.261477615315136	6.54321747695608e-19
1531	T149M	Collaterally Neutral	Collaterally Neutral	Collaterally Neutral	Collaterally Sensitive	0.363816634386455	0.412420440255227	0.431881584018026	1	0.636183365613545	0.587579559744773	0.568118415981974	8.17076723062479e-150
1532	T149N	Collaterally Sensitive	Collaterally Neutral	Collaterally Sensitive	Collaterally Sensitive	0.999985639031285	0.728875199991042	0.954353564052869	1	1.43609687153518e-05	0.271124800008958	0.045646435947131	8.24405773141511e-18
1533	T149P	Collaterally Sensitive	Collaterally Neutral	Collaterally Sensitive	Collaterally Sensitive	0.999999999999222	0.568858690304528	0.962498893939224	1	7.78478996557077e-13	0.431141309695472	0.0375011060607762	3.15187288920279e-25
1534	T149Q	Collaterally Sensitive	Collaterally Neutral	Collaterally Sensitive	Collaterally Sensitive	0.946673261115554	0.569886104361372	0.999999999984414	0.97279058061236	0.0533267388844463	0.430113895638628	1.55858318635736e-11	0.0272094193876402
1535	T149R	Collaterally Resistant	Collaterally Neutral	Collaterally Neutral	Collaterally Sensitive	0	0.418139353434085	0.521782143543074	0.9864979697384	1	0.581860646565915	0.478217856456926	0.0135020302615996
1536	T149W	Collaterally Neutral	Collaterally Neutral	Collaterally Sensitive	Collaterally Sensitive	0.506762915805762	0.535610692238895	0.95208498286386	1	0.493237084194238	0.464389307761104	0.0479150171361397	1.1660414203297e-22
1537	T149Y	Collaterally Sensitive	Collaterally Neutral	Collaterally Sensitive	Collaterally Sensitive	0.999942281571554	0.455532318061293	0.999999999944055	1	5.77184284465116e-05	0.544467681938707	5.59447508139434e-11	4.13997390643776e-86
1538	A150C	Collaterally Neutral	Collaterally Sensitive	Collaterally Neutral	Collaterally Sensitive	0.549050959472863	0.8861364811621	0.46307144924324	0.959660068213018	0.450949040527137	0.1138635188379	0.53692855075676	0.0403399317869822
1539	A150E	Collaterally Neutral	Collaterally Sensitive	Collaterally Neutral	Collaterally Neutral	0.280484708260491	1	0.507397511558046	0.414906774049543	0.719515291739509	1.27881770839444e-25	0.492602488441953	0.585093225950457
1540	A150F	Collaterally Neutral	Collaterally Neutral	Collaterally Neutral	Collaterally Neutral	0.834557059030726	0.489835111353712	0.486118204742569	0.775524753455134	0.165442940969274	0.510164888646288	0.513881795257431	0.224475246544866
1541	A150G	Collaterally Neutral	Collaterally Neutral	Collaterally Neutral	Collaterally Neutral	0.34869502274771	0.58384663399228	0.813778626651068	0.598169994763813	0.65130497725229	0.41615336600772	0.186221373348932	0.401830005236187
1542	A150H	Collaterally Neutral	Collaterally Neutral	Collaterally Neutral	Collaterally Neutral	0.347967039341504	0.742975025082894	0.353712709245107	0.522281769954147	0.652032960658496	0.257024974917106	0.646287290754893	0.477718230045853
1543	A150I	Collaterally Neutral	Collaterally Neutral	Collaterally Neutral	Collaterally Neutral	0.245324329763407	0.742507175933613	0.180814361427765	0.344837285857855	0.754675670236593	0.257492824066387	0.819185638572235	0.655162714142145
1544	A150K	Collaterally Resistant	Collaterally Neutral	Collaterally Sensitive	Collaterally Neutral	0.0256831776760059	0.29382365904503	0.993190592110648	0.155362088199918	0.974316822323994	0.70617634095497	0.00680940788935179	0.844637911800082
1545	A150L	Collaterally Neutral	Collaterally Neutral	Collaterally Resistant	Collaterally Resistant	0.198515329639807	0.369341967034271	0.0609651035758594	0.0472044741990802	0.801484670360193	0.630658032965729	0.939034896424141	0.95279552580092
1546	A150N	Collaterally Neutral	Collaterally Sensitive	Collaterally Resistant	Collaterally Neutral	0.584964934914164	1	0.000129549800853668	0.762355085371824	0.415035065085836	0	0.999870450199146	0.237644914628176
1547	A150P	Collaterally Neutral	Collaterally Neutral	Collaterally Neutral	Collaterally Sensitive	0.214711827978282	0.733977118545878	0.41347414938959	1	0.785288172021718	0.266022881454122	0.58652585061041	5.12565297856398e-175
1548	A150Q	Collaterally Resistant	Collaterally Neutral	Collaterally Neutral	Collaterally Neutral	0.0136928917051777	0.874824216478375	0.298381857332322	0.757126010592732	0.986307108294822	0.125175783521625	0.701618142667678	0.242873989407268
1549	A150R	Collaterally Neutral	Collaterally Neutral	Collaterally Neutral	Collaterally Neutral	0.317884272962429	0.479336809544539	0.386340083426086	0.406478944345386	0.682115727037571	0.520663190455461	0.613659916573914	0.593521055654614
1550	A150T	Collaterally Neutral	Collaterally Neutral	Collaterally Neutral	Collaterally Sensitive	0.856962007186269	0.61593815834446	0.566851104132433	0.928726630783486	0.143037992813731	0.38406184165554	0.433148895867567	0.0712733692165144
1551	A150V	Collaterally Neutral	Collaterally Neutral	Collaterally Neutral	Collaterally Neutral	0.558938787680531	0.731751242919388	0.588048939043693	0.488392760541862	0.441061212319469	0.268248757080612	0.411951060956307	0.511607239458138
1552	A150W	Collaterally Neutral	Collaterally Neutral	Collaterally Neutral	Collaterally Neutral	0.183212653282985	0.335234635384188	0.285437103277497	0.635053981157722	0.816787346717015	0.664765364615812	0.714562896722503	0.364946018842278
1553	A150Y	Collaterally Neutral	Collaterally Sensitive	Collaterally Neutral	Collaterally Sensitive	0.869048834723676	0.976230770487515	0.537190404463173	0.991650327591694	0.130951165276324	0.0237692295124848	0.462809595536827	0.00834967240830578
1554	F151A	Collaterally Neutral	Collaterally Neutral	Collaterally Neutral	Collaterally Sensitive	0.27740683447978	0.691443242974551	0.671336092755447	0.996626584283491	0.72259316552022	0.308556757025449	0.328663907244553	0.00337341571650908
1555	F151C	Collaterally Neutral	Collaterally Neutral	Collaterally Resistant	Collaterally Sensitive	0.290593577187421	0.377984342713952	0.00321655652872044	1	0.709406422812579	0.622015657286048	0.99678344347128	3.66933000893723e-45
1556	F151D	Collaterally Neutral	Collaterally Neutral	Collaterally Neutral	Collaterally Sensitive	0.246610843348909	0.536183234154337	0.530493549350029	0.999999999999759	0.753389156651091	0.463816765845663	0.469506450649971	2.40542452719703e-13
1557	F151G	Collaterally Neutral	Collaterally Resistant	Collaterally Neutral	Collaterally Sensitive	0.278764202864085	3.19621801248005e-08	0.850231694674022	1	0.721235797135915	0.99999996803782	0.149768305325978	2.96171040450857e-68
1558	F151H	Collaterally Neutral	Collaterally Resistant	Collaterally Neutral	Collaterally Sensitive	0.302001842918253	0.00372532228337008	0.636520677199848	0.999998735525157	0.697998157081747	0.99627467771663	0.363479322800152	1.26447484288147e-06
1559	F151I	Collaterally Neutral	Collaterally Neutral	Collaterally Neutral	Collaterally Sensitive	0.251771467975632	0.264716884831626	0.386605682062354	0.960580563708438	0.748228532024368	0.735283115168374	0.613394317937646	0.0394194362915619
1560	F151K	Collaterally Neutral	Collaterally Sensitive	Collaterally Neutral	Collaterally Sensitive	0.378508619699031	0.999999995481079	0.748690304822095	1	0.621491380300969	4.51892119652377e-09	0.251309695177905	3.50326056387808e-110
1561	F151L	Collaterally Neutral	Collaterally Neutral	Collaterally Neutral	Collaterally Sensitive	0.20554635288008	0.299844166078828	0.448472549194192	0.998813463673686	0.79445364711992	0.700155833921172	0.551527450805808	0.00118653632631447
1562	F151N	Collaterally Neutral	Collaterally Resistant	Collaterally Neutral	Collaterally Sensitive	0.22058607179679	0.000195802046542348	0.596854769631844	1	0.77941392820321	0.999804197953458	0.403145230368156	1.29045787840861e-19
1563	F151P	Collaterally Sensitive	Collaterally Sensitive	Collaterally Sensitive	Collaterally Sensitive	0.994647662323436	1	0.999999999951292	0.999999711028019	0.005352337676564	1.19976645922188e-67	4.87079858254936e-11	2.8897198081794e-07
1564	F151Q	Collaterally Neutral	Collaterally Neutral	Collaterally Neutral	Collaterally Sensitive	0.239680325993843	0.368733937101706	0.716329516767931	0.958240050189499	0.760319674006157	0.631266062898294	0.283670483232069	0.0417599498105007
1565	F151R	Collaterally Neutral	Collaterally Resistant	Collaterally Neutral	Collaterally Sensitive	0.253004149784578	0	0.322158078945083	1	0.746995850215422	1	0.677841921054917	2.96498119446524e-35
1566	F151S	Collaterally Neutral	Collaterally Neutral	Collaterally Neutral	Collaterally Sensitive	0.280978664577779	0.385804899240179	0.51525356010876	0.999999989214329	0.719021335422221	0.614195100759821	0.48474643989124	1.07856708437056e-08
1567	F151T	Collaterally Neutral	Collaterally Neutral	Collaterally Neutral	Collaterally Sensitive	0.225475432624093	0.385688552033674	0.5997832015979	0.99572173252044	0.774524567375907	0.614311447966326	0.4002167984021	0.00427826747955952
1568	F151V	Collaterally Neutral	Collaterally Neutral	Collaterally Neutral	Collaterally Sensitive	0.308895139465885	0.366713984754332	0.668564949966395	0.995569019638806	0.691104860534115	0.633286015245668	0.331435050033605	0.00443098036119406
1569	L152A	Collaterally Neutral	Collaterally Resistant	Collaterally Neutral	Collaterally Sensitive	0.475376674355649	0.0477126086518171	0.166966251876916	0.999588162510799	0.524623325644351	0.952287391348183	0.833033748123084	0.000411837489201009
1570	L152C	Collaterally Neutral	Collaterally Neutral	Collaterally Neutral	Collaterally Sensitive	0.190764120858025	0.345676253824314	0.379265479241738	0.996368022716212	0.809235879141975	0.654323746175686	0.620734520758262	0.00363197728378806
1571	L152D	Collaterally Neutral	Collaterally Sensitive	Collaterally Sensitive	Collaterally Sensitive	0.853650170906659	0.999999999999999	1	1	0.146349829093341	8.67368087662279e-16	1.16899990148272e-247	5.68285824229015e-201
1572	L152E	Collaterally Neutral	Collaterally Sensitive	Collaterally Sensitive	Collaterally Sensitive	0.666837706062845	0.976125892947296	0.99816090747783	1	0.333162293937155	0.0238741070527042	0.00183909252216958	0
1573	L152F	Collaterally Resistant	Collaterally Neutral	Collaterally Neutral	Collaterally Sensitive	0.0391067739241575	0.467150636278036	0.435978920825793	0.896299906857806	0.960893226075842	0.532849363721964	0.564021079174207	0.103700093142194
1574	L152G	Collaterally Neutral	Collaterally Neutral	Collaterally Neutral	Collaterally Sensitive	0.269263044307178	0.196813401748128	0.777606336334078	1	0.730736955692822	0.803186598251872	0.222393663665922	4.44198130919435e-41
1575	L152H	Collaterally Neutral	Collaterally Neutral	Collaterally Sensitive	Collaterally Sensitive	0.504314158004058	0.406478852045698	0.88311789217806	0.999215465928053	0.495685841995942	0.593521147954302	0.11688210782194	0.000784534071947175
1576	L152K	Collaterally Sensitive	Collaterally Sensitive	Collaterally Sensitive	Collaterally Sensitive	0.924486772061929	1	0.999995028482799	1	0.0755132279380714	5.40892813586412e-19	4.97151720115203e-06	1.71306663769973e-27
1577	L152N	Collaterally Sensitive	Collaterally Neutral	Collaterally Neutral	Collaterally Sensitive	0.99998088388565	0.740915850499702	0.582378582351014	0.99997928601136	1.91161143503987e-05	0.259084149500298	0.417621417648986	2.0713988640118e-05
1578	L152P	Collaterally Sensitive	Collaterally Sensitive	Collaterally Sensitive	Collaterally Sensitive	0.966765286558334	1	0.999999999986489	0.999999999396901	0.0332347134416661	2.03120204722833e-120	1.35105428779276e-11	6.03099397188776e-10
1579	L152R	Collaterally Sensitive	Collaterally Sensitive	Collaterally Sensitive	Collaterally Sensitive	0.999995390915858	0.999999999997562	0.99976076243576	0.999981026062757	4.609084141849e-06	2.43796287863987e-12	0.000239237564239988	1.89739372431728e-05
1580	L152S	Collaterally Resistant	Collaterally Resistant	Collaterally Neutral	Collaterally Sensitive	0	0.0582954208358659	0.263444148799199	0.999999999996211	1	0.941704579164134	0.736555851200801	3.78899888115313e-12
1581	L152T	Collaterally Neutral	Collaterally Neutral	Collaterally Neutral	Collaterally Sensitive	0.259217818233128	0.135746919733725	0.325774729332099	0.998388514115019	0.740782181766872	0.864253080266275	0.674225270667901	0.00161148588498069
1582	L152W	Collaterally Neutral	Collaterally Sensitive	Collaterally Neutral	Collaterally Sensitive	0.397199209332862	0.952132034197739	0.497736920434853	1	0.602800790667138	0.0478679658022612	0.502263079565147	0
1583	H153A	Collaterally Neutral	Collaterally Neutral	Collaterally Neutral	Collaterally Neutral	0.345568967391213	0.634630014117057	0.434762434692826	0.331618714995878	0.654431032608787	0.365369985882943	0.565237565307174	0.668381285004122
1584	H153C	Collaterally Resistant	Collaterally Sensitive	Collaterally Neutral	Collaterally Sensitive	0.0532986637132754	0.98682842150055	0.842648957265421	1	0.946701336286725	0.0131715784994499	0.157351042734579	1.97460463265863e-19
1585	H153D	Collaterally Neutral	Collaterally Sensitive	Collaterally Neutral	Collaterally Neutral	0.346267170379678	0.999908032537132	0.338571877491975	0.671419884122111	0.653732829620322	9.19674628684299e-05	0.661428122508025	0.328580115877889
1586	H153E	Collaterally Neutral	Collaterally Neutral	Collaterally Neutral	Collaterally Resistant	0.46251949312595	0.689262990145705	0.337658212912226	0.116062289053912	0.53748050687405	0.310737009854295	0.662341787087774	0.883937710946088
1587	H153F	Collaterally Neutral	Collaterally Neutral	Collaterally Neutral	Collaterally Neutral	0.423062795310275	0.848909379518284	0.637144569583399	0.564253533806631	0.576937204689725	0.151090620481716	0.362855430416601	0.435746466193369
1588	H153G	Collaterally Resistant	Collaterally Sensitive	Collaterally Neutral	Collaterally Neutral	0.0671745395185722	0.960735708014731	0.364900625341146	0.22925574470645	0.932825460481428	0.0392642919852687	0.635099374658854	0.77074425529355
1589	H153L	Collaterally Neutral	Collaterally Neutral	Collaterally Neutral	Collaterally Sensitive	0.236011218482588	0.684775989643213	0.32102289000505	0.999463707588402	0.763988781517412	0.315224010356787	0.67897710999495	0.000536292411597534
1590	H153M	Collaterally Neutral	Collaterally Sensitive	Collaterally Neutral	Collaterally Neutral	0.240276615370472	0.999830021580143	0.509656783080034	0.257160314573038	0.759723384629528	0.000169978419856568	0.490343216919966	0.742839685426962
1591	H153N	Collaterally Neutral	Collaterally Sensitive	Collaterally Neutral	Collaterally Resistant	0.18481442129995	0.932376578493934	0.157238691765064	0.111580817685153	0.81518557870005	0.0676234215060656	0.842761308234936	0.888419182314847
1592	H153P	Collaterally Sensitive	Collaterally Sensitive	Collaterally Sensitive	Collaterally Sensitive	0.997941315413791	0.986959659190025	0.998278425063127	0.999999997951671	0.00205868458620882	0.0130403408099752	0.00172157493687335	2.0483284526273e-09
1593	H153Q	Collaterally Resistant	Collaterally Sensitive	Collaterally Neutral	Collaterally Resistant	0.0651593858821391	0.91309687766843	0.332332621054777	0.118785185631221	0.934840614117861	0.0869031223315704	0.667667378945223	0.881214814368779
1594	H153R	Collaterally Neutral	Collaterally Sensitive	Collaterally Neutral	Collaterally Resistant	0.352733814630976	0.92008199832047	0.423209209754392	0.0925890486641828	0.647266185369024	0.0799180016795302	0.576790790245608	0.907410951335817
1595	H153T	Collaterally Neutral	Collaterally Sensitive	Collaterally Neutral	Collaterally Neutral	0.278928247441584	0.997360697693884	0.331694659248272	0.326656718951904	0.721071752558416	0.00263930230611635	0.668305340751728	0.673343281048096
1596	H153V	Collaterally Neutral	Collaterally Neutral	Collaterally Neutral	Collaterally Neutral	0.461506799712465	0.737914265586741	0.433583072440127	0.491478506407081	0.538493200287535	0.262085734413259	0.566416927559873	0.508521493592919
1597	H153W	Collaterally Resistant	Collaterally Sensitive	Collaterally Neutral	Collaterally Sensitive	0.0482228438111492	0.999998116764888	0.526482411081257	0.925393823872531	0.951777156188851	1.88323511193764e-06	0.473517588918743	0.0746061761274693
1598	H153Y	Collaterally Resistant	Collaterally Sensitive	Collaterally Neutral	Collaterally Neutral	0.0148264689538278	1	0.463441111697516	0.423348200943533	0.985173531046172	8.2098879420012e-132	0.536558888302484	0.576651799056467
1599	N154P	Collaterally Neutral	Collaterally Sensitive	Collaterally Sensitive	Collaterally Sensitive	0.710092901902781	0.888689945054424	0.887394621528327	0.999999999994879	0.289907098097219	0.111310054945576	0.112605378471673	5.12127044391848e-12
1600	M155A	Collaterally Neutral	Collaterally Neutral	Collaterally Neutral	Collaterally Neutral	0.780272347216299	0.633895207762702	0.653458458830844	0.827410535778069	0.219727652783701	0.366104792237298	0.346541541169156	0.172589464221931
1601	M155C	Collaterally Sensitive	Collaterally Neutral	Collaterally Neutral	Collaterally Neutral	0.952024176064309	0.653430739720813	0.53925197207526	0.854676219702915	0.0479758239356908	0.346569260279187	0.46074802792474	0.145323780297085
1602	M155D	Collaterally Sensitive	Collaterally Neutral	Collaterally Sensitive	Collaterally Sensitive	1	0.649868683127786	0.999224476382935	0.999999999895887	1.25719721490944e-75	0.350131316872214	0.000775523617064569	1.04113535824904e-10
1603	M155E	Collaterally Sensitive	Collaterally Sensitive	Collaterally Sensitive	Collaterally Sensitive	0.999999130054077	0.985532261543126	0.999171756484103	1	8.6994592331513e-07	0.0144677384568735	0.000828243515897347	6.60491001292518e-38
1604	M155F	Collaterally Neutral	Collaterally Neutral	Collaterally Neutral	Collaterally Sensitive	0.829225240698581	0.869521847511085	0.829847453114194	0.999999999999069	0.170774759301419	0.130478152488915	0.170152546885806	9.30662015845427e-13
1605	M155G	Collaterally Sensitive	Collaterally Neutral	Collaterally Neutral	Collaterally Sensitive	0.890431042346571	0.847306583735574	0.763215012141089	0.99999681667137	0.109568957653429	0.152693416264426	0.236784987858911	3.18332862997357e-06
1606	M155H	Collaterally Sensitive	Collaterally Sensitive	Collaterally Sensitive	Collaterally Sensitive	0.999216274000705	0.982510268679937	0.999992327333348	0.998171849653889	0.000783725999295462	0.0174897313200632	7.67266665243378e-06	0.00182815034611101
1607	M155I	Collaterally Sensitive	Collaterally Sensitive	Collaterally Sensitive	Collaterally Sensitive	1	0.937997533365708	1	0.963153500970998	1.54306261624856e-20	0.0620024666342922	1.6836153993497e-21	0.0368464990290015
1608	M155K	Collaterally Sensitive	Collaterally Sensitive	Collaterally Neutral	Collaterally Sensitive	0.999809080171035	0.999988663081573	0.504324353259929	0.99999879224816	0.000190919828965176	1.13369184271689e-05	0.495675646740071	1.20775184028516e-06
1609	M155N	Collaterally Sensitive	Collaterally Sensitive	Collaterally Sensitive	Collaterally Sensitive	1	0.994480514555074	0.999064736720865	1	0	0.00551948544492598	0.000935263279135245	5.37227907558936e-31
1610	M155P	Collaterally Sensitive	Collaterally Sensitive	Collaterally Sensitive	Collaterally Sensitive	0.969799609585587	1	1	1	0.030200390414413	0	0	0
1611	M155R	Collaterally Sensitive	Collaterally Sensitive	Collaterally Neutral	Collaterally Sensitive	1	0.961915765843965	0.7706683913027	0.99999963034338	8.04758511070609e-68	0.0380842341560349	0.2293316086973	3.6965662046134e-07
1612	M155S	Collaterally Sensitive	Collaterally Neutral	Collaterally Sensitive	Collaterally Sensitive	0.927226891501126	0.861324217210532	1	1	0.0727731084988739	0.138675782789468	0	1.82364409733623e-72
1613	M155T	Collaterally Neutral	Collaterally Sensitive	Collaterally Neutral	Collaterally Sensitive	0.705695172851952	0.961457591800008	0.632034526580984	0.898422474593407	0.294304827148048	0.0385424081999925	0.367965473419016	0.101577525406593
1614	M155V	Collaterally Neutral	Collaterally Neutral	Collaterally Neutral	Collaterally Sensitive	0.871120413073325	0.86052145715039	0.568942427455938	0.999680295691644	0.128879586926675	0.13947854284961	0.431057572544062	0.000319704308355775
1615	M155Y	Collaterally Sensitive	Collaterally Sensitive	Collaterally Sensitive	Collaterally Sensitive	0.984307160189633	0.931620053322828	0.994958841108174	0.996335315633659	0.0156928398103671	0.0683799466771716	0.00504115889182619	0.0036646843663413
1616	G156C	Collaterally Neutral	Collaterally Neutral	Collaterally Neutral	Collaterally Sensitive	0.277571533054975	0.420899789635027	0.459015494083208	1	0.722428466945025	0.579100210364973	0.540984505916792	4.06434636856471e-16
1617	G156F	Collaterally Neutral	Collaterally Sensitive	Collaterally Sensitive	Collaterally Sensitive	0.659254036168778	0.933861820202269	0.963532510998436	0.99999999906286	0.340745963831222	0.0661381797977308	0.0364674890015644	9.37140282189555e-10
1618	G156H	Collaterally Neutral	Collaterally Neutral	Collaterally Sensitive	Collaterally Sensitive	0.752921179811812	0.76287127627176	0.999997300986596	0.988904469222362	0.247078820188188	0.23712872372824	2.69901340389089e-06	0.0110955307776377
1619	G156I	Collaterally Sensitive	Collaterally Sensitive	Collaterally Sensitive	Collaterally Sensitive	0.999236049866119	0.965597750198085	0.994917499293051	1	0.000763950133881447	0.034402249801915	0.00508250070694908	3.30178740557194e-16
1620	G156K	Collaterally Neutral	Collaterally Neutral	Collaterally Neutral	Collaterally Sensitive	0.210176869126798	0.706219059968861	0.758409656040434	0.999999985587866	0.789823130873202	0.293780940031139	0.241590343959566	1.44121336615974e-08
1621	G156L	Collaterally Resistant	Collaterally Neutral	Collaterally Sensitive	Collaterally Sensitive	0.000205058007925918	0.499232864059503	0.898293896294984	1	0.999794941992074	0.500767135940497	0.101706103705016	5.20937900974894e-48
1622	G156N	Collaterally Resistant	Collaterally Resistant	Collaterally Sensitive	Collaterally Sensitive	0.0583164525842353	0.110087010084782	0.999999999930054	0.937041147012055	0.941683547415765	0.889912989915218	6.9946445930419e-11	0.0629588529879452
1623	G156P	Collaterally Sensitive	Collaterally Neutral	Collaterally Sensitive	Collaterally Sensitive	0.977728262533806	0.508463527767671	0.950775175446749	0.99999969842178	0.0222717374661937	0.491536472232329	0.0492248245532514	3.01578220186686e-07
1624	G156R	Collaterally Neutral	Collaterally Neutral	Collaterally Neutral	Collaterally Sensitive	0.711853017483517	0.555359408731071	0.551944204137487	0.999999999999807	0.288146982516483	0.444640591268929	0.448055795862513	1.92692837637667e-13
1625	G156S	Collaterally Resistant	Collaterally Neutral	Collaterally Sensitive	Collaterally Sensitive	0.039957989850272	0.378984551809249	1	0.999141028785906	0.960042010149728	0.621015448190751	2.29994549361685e-65	0.000858971214094264
1626	G156T	Collaterally Sensitive	Collaterally Neutral	Collaterally Sensitive	Collaterally Sensitive	0.921942993586839	0.725681060452177	0.884572583460537	1	0.078057006413161	0.274318939547823	0.115427416539463	4.54073499902223e-34
1627	G156V	Collaterally Neutral	Collaterally Sensitive	Collaterally Sensitive	Collaterally Sensitive	0.549060410576837	1	0.995914786453036	0.971328468712131	0.450939589423163	6.03850869449089e-23	0.00408521354696422	0.0286715312878685
1628	G156W	Collaterally Neutral	Collaterally Neutral	Collaterally Sensitive	Collaterally Sensitive	0.160243441328857	0.48192934379604	0.999991237007795	0.999999887764608	0.839756558671143	0.51807065620396	8.76299220450695e-06	1.12235392469871e-07
1629	G156Y	Collaterally Neutral	Collaterally Neutral	Collaterally Sensitive	Collaterally Sensitive	0.548031123521854	0.623871124685191	0.936816717454421	0.999985746988229	0.451968876478146	0.376128875314809	0.0631832825455787	1.42530117714535e-05
1630	D157H	Collaterally Sensitive	Collaterally Sensitive	Collaterally Sensitive	Collaterally Sensitive	0.99943229341799	1	0.999999992518497	1	0.000567706582010325	1.92012664200873e-20	7.4815030843361e-09	0
1631	D157N	Collaterally Resistant	Collaterally Neutral	Collaterally Neutral	Collaterally Sensitive	0.0806231367744062	0.519427524511773	0.55987779241463	1	0.919376863225594	0.480572475488228	0.44012220758537	1.00222947020764e-27
1632	D157P	Collaterally Sensitive	Collaterally Sensitive	Collaterally Sensitive	Collaterally Sensitive	0.982257957822812	0.999999999887124	1	0.999999214759264	0.0177420421771881	1.12875772422438e-10	4.86222794619711e-77	7.85240736272938e-07
1633	D157Q	Collaterally Sensitive	Collaterally Sensitive	Collaterally Sensitive	Collaterally Sensitive	0.999999941966245	0.999767071654981	1	0.999999999994806	5.8033754974711e-08	0.000232928345019203	3.78240227928244e-17	5.19391664464793e-12
1634	D157R	Collaterally Sensitive	Collaterally Sensitive	Collaterally Sensitive	Collaterally Sensitive	1	1	1	0.99999831670601	5.14658523804553e-22	2.45928968200736e-132	1.16297919809189e-44	1.68329399040575e-06
1635	D157T	Collaterally Sensitive	Collaterally Sensitive	Collaterally Sensitive	Collaterally Sensitive	0.979113118005444	1	1	0.998860438811419	0.0208868819945557	8.60728188638627e-27	1.88657232249394e-18	0.00113956118858118
1636	H158D	Collaterally Resistant	Collaterally Sensitive	Collaterally Neutral	Collaterally Sensitive	0	0.950474121614281	0.454536983599097	0.884158517672083	1	0.0495258783857188	0.545463016400903	0.115841482327917
1637	H158Q	Collaterally Neutral	Collaterally Neutral	Collaterally Sensitive	Collaterally Sensitive	0.327366125320285	0.672600866692483	0.999877282586141	0.879997386852391	0.672633874679715	0.327399133307517	0.000122717413858854	0.120002613147609
1638	H158Y	Collaterally Neutral	Collaterally Neutral	Collaterally Neutral	Collaterally Neutral	0.387521944238533	0.387281268862807	0.842179584751942	0.526155041661444	0.612478055761467	0.612718731137193	0.157820415248058	0.473844958338555
1639	V159K	Collaterally Neutral	Collaterally Neutral	Collaterally Neutral	Collaterally Sensitive	0.371302765993598	0.553510716949668	0.462587866642296	0.949605538523746	0.628697234006402	0.446489283050332	0.537412133357704	0.0503944614762537
1640	V159N	Collaterally Resistant	Collaterally Neutral	Collaterally Neutral	Collaterally Sensitive	0.0218515144947705	0.663319714514941	0.776982888563604	0.999999999998261	0.978148485505229	0.336680285485059	0.223017111436396	1.73880462555955e-12
1641	V159R	Collaterally Resistant	Collaterally Neutral	Collaterally Neutral	Collaterally Sensitive	0.0965115495822403	0.333038670492275	0.714334114589324	0.999858630717737	0.90348845041776	0.666961329507725	0.285665885410676	0.000141369282263256
1642	V159W	Collaterally Resistant	Collaterally Neutral	Collaterally Neutral	Collaterally Sensitive	0.00491464588770985	0.138922926592922	0.643313831900533	0.924315859158709	0.99508535411229	0.861077073407078	0.356686168099467	0.075684140841291
1643	T160F	Collaterally Neutral	Collaterally Neutral	Collaterally Neutral	Collaterally Sensitive	0.389902835910535	0.58660045850648	0.404854663858482	1	0.610097164089465	0.41339954149352	0.595145336141518	0
1644	T160I	Collaterally Neutral	Collaterally Sensitive	Collaterally Sensitive	Collaterally Sensitive	0.34247388717358	0.99999720627099	0.992197574427738	1	0.65752611282642	2.79372900955885e-06	0.0078024255722624	1.17245626766221e-18
1645	R161F	Collaterally Neutral	Collaterally Resistant	Collaterally Neutral	Collaterally Sensitive	0.285665616559458	0.117530163139822	0.156567715708143	0.999986101860938	0.714334383440542	0.882469836860178	0.843432284291857	1.38981390622229e-05
1646	R161H	Collaterally Neutral	Collaterally Resistant	Collaterally Neutral	Collaterally Sensitive	0.291621173424566	0	0.538601127299067	0.999999999996799	0.708378826575434	1	0.461398872700933	3.20082372142328e-12
1647	R161I	Collaterally Neutral	Collaterally Neutral	Collaterally Neutral	Collaterally Sensitive	0.680292822443679	0.725163631823141	0.613422385607716	1	0.319707177556321	0.274836368176859	0.386577614392284	3.21795163571137e-71
1648	R161L	Collaterally Neutral	Collaterally Neutral	Collaterally Sensitive	Collaterally Sensitive	0.840400400491731	0.630311964387515	0.883359829227361	0.999999982184441	0.159599599508269	0.369688035612485	0.116640170772639	1.78155593994334e-08
1649	R161T	Collaterally Neutral	Collaterally Neutral	Collaterally Neutral	Collaterally Sensitive	0.463593881698968	0.275209418739554	0.222643890401183	0.988770770977537	0.536406118301032	0.724790581260446	0.777356109598817	0.0112292290224631
1650	R161V	Collaterally Neutral	Collaterally Neutral	Collaterally Resistant	Collaterally Sensitive	0.536420649152108	0.739565614633297	5.6621374255883e-15	0.999999015224556	0.463579350847892	0.260434385366703	0.999999999999994	9.84775443995778e-07
1651	L162A	Collaterally Neutral	Collaterally Neutral	Collaterally Neutral	Collaterally Sensitive	0.468569580464688	0.592061047382306	0.598238837560955	0.999999999999782	0.531430419535312	0.407938952617694	0.401761162439045	2.18290291524225e-13
1652	L162C	Collaterally Sensitive	Collaterally Sensitive	Collaterally Sensitive	Collaterally Sensitive	1	0.999887234638332	0.896508515979564	0.908646278794183	3.28034801897712e-84	0.00011276536166778	0.103491484020436	0.0913537212058166
1653	L162F	Collaterally Neutral	Collaterally Neutral	Collaterally Neutral	Collaterally Sensitive	0.762303665227493	0.171451285447344	0.578373553295708	1	0.237696334772507	0.828548714552656	0.421626446704292	1.88890926085426e-42
1654	L162H	Collaterally Resistant	Collaterally Resistant	Collaterally Neutral	Collaterally Sensitive	2.17080464715025e-10	0.107533434490039	0.635345717993435	0.999177138655995	0.99999999978292	0.892466565509961	0.364654282006565	0.000822861344005034
1655	L162I	Collaterally Sensitive	Collaterally Neutral	Collaterally Neutral	Collaterally Neutral	0.972749429731638	0.300845222276718	0.665358894026809	0.666073742247188	0.0272505702683622	0.699154777723282	0.334641105973191	0.333926257752812
1656	L162K	Collaterally Sensitive	Collaterally Sensitive	Collaterally Sensitive	Collaterally Sensitive	0.911419315860161	1	1	0.999999998082828	0.0885806841398386	1.40430471741378e-77	0	1.91717196058924e-09
1657	L162M	Collaterally Resistant	Collaterally Neutral	Collaterally Neutral	Collaterally Sensitive	0.0833228841178695	0.166298613447519	0.59770926578252	1	0.916677115882131	0.833701386552481	0.40229073421748	2.46572452205876e-75
1658	L162N	Collaterally Sensitive	Collaterally Neutral	Collaterally Sensitive	Collaterally Sensitive	0.986107414815505	0.614242171052571	0.982256441350219	0.999973873820233	0.0138925851844948	0.385757828947429	0.0177435586497811	2.61261797672008e-05
1659	L162R	Collaterally Sensitive	Collaterally Sensitive	Collaterally Sensitive	Collaterally Sensitive	0.999802375727755	1	1	0.999994365019429	0.000197624272244835	0	2.57695437147799e-85	5.63498057062462e-06
1660	L162S	Collaterally Neutral	Collaterally Sensitive	Collaterally Neutral	Collaterally Sensitive	0.500655801795472	0.99579009288307	0.618418856901303	0.997981166825445	0.499344198204528	0.00420990711693039	0.381581143098697	0.0020188331745548
1661	L162T	Collaterally Neutral	Collaterally Neutral	Collaterally Resistant	Collaterally Sensitive	0.159279458095534	0.260294766750557	1.0886473481575e-05	0.999538835449759	0.840720541904466	0.739705233249443	0.999989113526518	0.000461164550240938
1662	L162V	Collaterally Neutral	Collaterally Sensitive	Collaterally Neutral	Collaterally Sensitive	0.813367932997758	0.999999998292922	0.865427669267752	0.999996359395135	0.186632067002242	1.70707770414691e-09	0.134572330732248	3.64060486495866e-06
1663	L162W	Collaterally Neutral	Collaterally Sensitive	Collaterally Sensitive	Collaterally Sensitive	0.841077514449705	1	1	0.999999822130786	0.158922485550295	1.5920503363457e-34	0	1.77869213669784e-07
1664	D163A	Collaterally Sensitive	Collaterally Sensitive	Collaterally Sensitive	Collaterally Sensitive	0.939165659436183	0.999741592172535	0.979423288322974	1	0.0608343405638167	0.000258407827464777	0.0205767116770263	6.33234754372286e-20
1665	D163C	Collaterally Neutral	Collaterally Neutral	Collaterally Sensitive	Collaterally Sensitive	0.683023469524038	0.589062932155732	0.914073726760453	1	0.316976530475962	0.410937067844268	0.0859262732395473	3.53158263531405e-60
1666	D163E	Collaterally Sensitive	Collaterally Sensitive	Collaterally Sensitive	Collaterally Sensitive	0.908819583159321	1	0.999847762213608	1	0.0911804168406791	8.01175759919205e-168	0.000152237786391456	1.75819040627854e-35
1667	D163F	Collaterally Sensitive	Collaterally Sensitive	Collaterally Sensitive	Collaterally Sensitive	0.999805081023799	0.913869894771901	0.999999974712954	0.999999999982782	0.000194918976200645	0.0861301052280986	2.52870457826526e-08	1.72177891430799e-11
1668	D163G	Collaterally Sensitive	Collaterally Sensitive	Collaterally Sensitive	Collaterally Sensitive	1	0.992350946015241	0.999999925264277	0.999998217855636	1.22189678838573e-62	0.00764905398475901	7.47357234161201e-08	1.78214436392269e-06
1669	D163H	Collaterally Sensitive	Collaterally Sensitive	Collaterally Neutral	Collaterally Sensitive	1	1	0.646791459474799	0.999983921193353	1.81137778444433e-16	9.09984948097985e-18	0.353208540525201	1.60788066470228e-05
1670	D163I	Collaterally Neutral	Collaterally Neutral	Collaterally Sensitive	Collaterally Sensitive	0.685211425672321	0.818113842954796	0.948809592500045	1	0.314788574327679	0.181886157045204	0.0511904074999554	9.95985674748144e-62
1671	D163K	Collaterally Sensitive	Collaterally Sensitive	Collaterally Sensitive	Collaterally Sensitive	0.999999999972283	0.947944553005838	0.988588906669791	1	2.77166151669101e-11	0.0520554469941615	0.0114110933302093	1.27108467298859e-82
1672	D163L	Collaterally Neutral	Collaterally Sensitive	Collaterally Sensitive	Collaterally Sensitive	0.844260226027313	0.983548091162206	0.999999998072327	0.99999999999999	0.155739773972687	0.0164519088377942	1.92767259962304e-09	9.57940704416616e-15
1673	D163M	Collaterally Sensitive	Collaterally Sensitive	Collaterally Sensitive	Collaterally Sensitive	0.901854661297973	1	0.963853658920396	1	0.0981453387020269	0	0.0361463410796043	2.73213635490573e-298
1674	D163N	Collaterally Neutral	Collaterally Neutral	Collaterally Neutral	Collaterally Sensitive	0.534638542274397	0.825855275967731	0.484175283337821	1	0.465361457725603	0.174144724032269	0.515824716662179	2.69599993246665e-28
1675	D163P	Collaterally Sensitive	Collaterally Sensitive	Collaterally Sensitive	Collaterally Sensitive	1	1	0.999999999836253	0.999999999982502	9.67073127008949e-274	8.93534853210788e-32	1.63747108871623e-10	1.74979011625023e-11
1676	D163Q	Collaterally Sensitive	Collaterally Sensitive	Collaterally Sensitive	Collaterally Sensitive	0.99358496152463	0.994599526122649	0.944262267489997	0.999999999999998	0.00641503847536958	0.00540047387735104	0.0557377325100035	2.28032624370645e-15
1677	D163R	Collaterally Sensitive	Collaterally Sensitive	Collaterally Sensitive	Collaterally Sensitive	0.999998176326178	0.992337212882683	0.999883471128277	1	1.82367382169178e-06	0.00766278711731751	0.000116528871723262	0
1678	D163S	Collaterally Sensitive	Collaterally Sensitive	Collaterally Sensitive	Collaterally Sensitive	1	0.999833559432555	1	0.999969209173965	7.63533501585334e-81	0.000166440567445349	3.50102110681111e-234	3.07908260352904e-05
1679	D163T	Collaterally Neutral	Collaterally Neutral	Collaterally Sensitive	Collaterally Sensitive	0.852862233979679	0.65924467257556	0.940279171775008	1	0.147137766020321	0.34075532742444	0.0597208282249916	1.35229338436694e-129
1680	D163V	Collaterally Sensitive	Collaterally Sensitive	Collaterally Neutral	Collaterally Sensitive	0.997526167747521	0.969599147876963	0.859281959673285	1	0.00247383225247893	0.0304008521230371	0.140718040326715	0
1681	D163W	Collaterally Neutral	Collaterally Sensitive	Collaterally Sensitive	Collaterally Sensitive	0.773282742131595	0.984179575526414	1	1	0.226717257868405	0.0158204244735863	0	5.28611472551493e-36
1682	D163Y	Collaterally Neutral	Collaterally Neutral	Collaterally Sensitive	Collaterally Sensitive	0.816959689922796	0.831546508393074	0.959746253080397	0.999731767150322	0.183040310077204	0.168453491606926	0.0402537469196033	0.000268232849678402
1683	R164A	Collaterally Resistant	Collaterally Neutral	Collaterally Neutral	Collaterally Sensitive	0.0244023407757544	0.679147805158286	0.746761410036291	1	0.975597659224246	0.320852194841714	0.253238589963709	1.44290283165957e-16
1684	R164C	Collaterally Neutral	Collaterally Neutral	Collaterally Neutral	Collaterally Sensitive	0.639285573859852	0.526545558576186	0.547107669539314	0.999999924714119	0.360714426140148	0.473454441423814	0.452892330460686	7.5285880623188e-08
1685	R164D	Collaterally Sensitive	Collaterally Neutral	Collaterally Sensitive	Collaterally Sensitive	0.893259404614922	0.863715127770915	1	0.989848525592342	0.106740595385078	0.136284872229085	1.52360073421677e-100	0.0101514744076577
1686	R164E	Collaterally Sensitive	Collaterally Neutral	Collaterally Sensitive	Collaterally Sensitive	0.999999935470784	0.159298366032461	0.945154260756312	1	6.45292159714617e-08	0.840701633967539	0.0548457392436875	2.53069990703536e-96
1687	R164F	Collaterally Neutral	Collaterally Sensitive	Collaterally Sensitive	Collaterally Sensitive	0.472040253205761	0.974037581942666	0.999969912223735	0.999998809237247	0.527959746794239	0.025962418057334	3.0087776265407e-05	1.19076275324001e-06
1688	R164G	Collaterally Resistant	Collaterally Neutral	Collaterally Neutral	Collaterally Sensitive	0.0361079303306694	0.600627204853897	0.714143609249246	0.999998451187305	0.963892069669331	0.399372795146103	0.285856390750754	1.54881269490287e-06
1689	R164H	Collaterally Resistant	Collaterally Neutral	Collaterally Neutral	Collaterally Sensitive	0.0799254347513538	0.279616580172407	0.811485499025927	0.999999999999999	0.920074565248646	0.720383419827593	0.188514500974073	8.77803637993994e-16
1690	R164I	Collaterally Sensitive	Collaterally Sensitive	Collaterally Sensitive	Collaterally Sensitive	0.998607770531214	1	0.999999999999702	0.999999999999993	0.00139222946878628	0	2.97998678367615e-13	6.79873149864472e-15
1691	R164K	Collaterally Resistant	Collaterally Neutral	Collaterally Sensitive	Collaterally Sensitive	5.84199355557757e-13	0.722668955425936	0.968171106143742	1	0.999999999999416	0.277331044574064	0.0318288938562583	0
1692	R164L	Collaterally Neutral	Collaterally Neutral	Collaterally Sensitive	Collaterally Sensitive	0.623357133982202	0.76678587793438	0.999980331459418	0.999332215271071	0.376642866017798	0.23321412206562	1.96685405820275e-05	0.000667784728928923
1693	R164M	Collaterally Neutral	Collaterally Neutral	Collaterally Sensitive	Collaterally Sensitive	0.204899804807299	0.404360205659236	0.99885014692989	0.99999987094987	0.795100195192701	0.595639794340764	0.00114985307011018	1.29050129886203e-07
1694	R164N	Collaterally Resistant	Collaterally Resistant	Collaterally Resistant	Collaterally Sensitive	0	0.0978524490278998	3.66281568409121e-07	0.998781038987297	1	0.9021475509721	0.999999633718432	0.00121896101270311
1695	R164P	Collaterally Sensitive	Collaterally Sensitive	Collaterally Sensitive	Collaterally Sensitive	1	1	0.999999999999999	1	1.53956098462883e-41	0	5.43931328453859e-16	3.7865229022436e-39
1696	R164Q	Collaterally Resistant	Collaterally Resistant	Collaterally Neutral	Collaterally Sensitive	0.0610577874552141	0	0.491331292124626	1	0.938942212544786	1	0.508668707875374	9.59718263392353e-259
1697	R164S	Collaterally Neutral	Collaterally Sensitive	Collaterally Sensitive	Collaterally Sensitive	0.266228580404655	0.999613038761057	0.968038669830168	0.999979592710937	0.733771419595345	0.000386961238943078	0.0319613301698323	2.04072890631634e-05
1698	R164T	Collaterally Neutral	Collaterally Neutral	Collaterally Neutral	Collaterally Sensitive	0.630986258559497	0.74667230004874	0.728548231613803	0.999999646750135	0.369013741440503	0.25332769995126	0.271451768386198	3.53249864976071e-07
1699	R164V	Collaterally Neutral	Collaterally Sensitive	Collaterally Sensitive	Collaterally Sensitive	0.457572569959657	1	1	0.999836340657818	0.542427430040343	5.05370080404083e-31	4.31622473842806e-25	0.000163659342182062
1700	R164W	Collaterally Sensitive	Collaterally Sensitive	Collaterally Sensitive	Collaterally Sensitive	0.981874721508097	1	1	0.999999999999997	0.0181252784919032	5.31335027041277e-112	2.71898434852223e-46	3.33357869743331e-15
1701	R164Y	Collaterally Neutral	Collaterally Sensitive	Collaterally Sensitive	Collaterally Sensitive	0.737518894409668	0.961462972879462	0.999999999612281	0.999999999991374	0.262481105590332	0.0385370271205376	3.87719456501803e-10	8.62621322490841e-12
1702	W165D	Collaterally Resistant	Collaterally Neutral	Collaterally Sensitive	Collaterally Sensitive	9.55764790872005e-05	0.208708911395631	0.999984818952616	0.998812376821781	0.999904423520913	0.791291088604369	1.51810473836747e-05	0.0011876231782194
1703	W165G	Collaterally Neutral	Collaterally Resistant	Collaterally Neutral	Collaterally Sensitive	0.63216706817456	3.53016906573522e-06	0.704632591606161	0.999878208254084	0.36783293182544	0.999996469830934	0.295367408393839	0.000121791745915766
1704	E166D	Collaterally Sensitive	Collaterally Sensitive	Collaterally Sensitive	Collaterally Sensitive	1	1	1	1	0	2.89488777580841e-284	3.65531606696087e-80	2.96468682239607e-24
1705	E166F	Collaterally Sensitive	Collaterally Sensitive	Collaterally Sensitive	Collaterally Sensitive	1	0.999994693640342	0.999971027358607	0.999994467204179	2.71150308684069e-44	5.30635965752562e-06	2.89726413932522e-05	5.53279582142857e-06
1706	E166G	Collaterally Sensitive	Collaterally Sensitive	Collaterally Sensitive	Collaterally Sensitive	1	1	1	0.999999987974884	2.91869192525691e-31	1.53592368106318e-234	5.62276642231453e-21	1.2025116208894e-08
1707	E166H	Collaterally Sensitive	Collaterally Sensitive	Collaterally Sensitive	Collaterally Sensitive	1	1	0.999999977385278	0.999999999999682	3.64895749674552e-21	7.29611018005641e-27	2.26147223878399e-08	3.17664400785985e-13
1708	E166K	Collaterally Sensitive	Collaterally Sensitive	Collaterally Sensitive	Collaterally Sensitive	0.99862060855639	1	1	1	0.00137939144360991	1.76415545310297e-23	2.37446630914359e-54	2.37967925763052e-21
1709	E166P	Collaterally Sensitive	Collaterally Sensitive	Collaterally Sensitive	Collaterally Sensitive	1	0.999999999999996	1	1	1.15741061835331e-83	4.18503361983182e-15	2.45998872660853e-101	0
1710	E166Q	Collaterally Sensitive	Collaterally Sensitive	Collaterally Sensitive	Collaterally Sensitive	1	0.999999999999363	1	0.99999999993009	1.7605124549199e-19	6.37261189277735e-13	1.34238867437914e-17	6.99098507117406e-11
1711	E166R	Collaterally Sensitive	Collaterally Sensitive	Collaterally Sensitive	Collaterally Sensitive	1	1	1	0.99999987174641	9.01840696071041e-33	4.64176182169752e-226	9.38335307870869e-18	1.28253590160379e-07
1712	E166V	Collaterally Sensitive	Collaterally Sensitive	Collaterally Sensitive	Collaterally Sensitive	1	1	1	1	8.20047840929125e-24	1.31394829640149e-208	0	5.14352923542936e-23
1713	E166W	Collaterally Sensitive	Collaterally Sensitive	Collaterally Sensitive	Collaterally Sensitive	1	0.999999999999999	1	0.999999999999997	0	1.39890965353644e-15	0	2.77584948652622e-15
[truncated: 1,077 more rows]
