# Supplementary material for: The population genetics of collateral resistance and sensitivity
Source: eLife journal article supplement (doi:10.7554/elife.73250), 2021-12-10
Supplement: supp [file elife-73250-supp-v1.zip › elife_poa_e73250_Figure_5_figure_supplement_1.pdf]

Rank by risk of collateral resistance

$1\sigma$

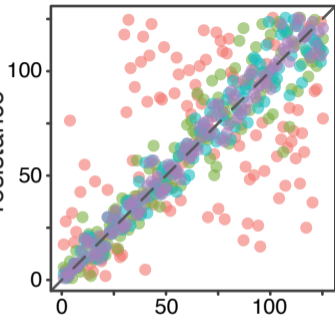

$2\sigma$

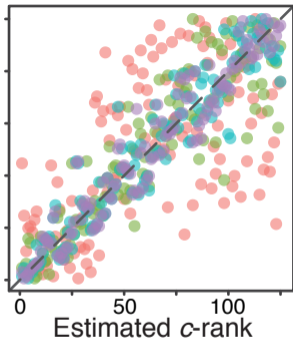

$3\sigma$

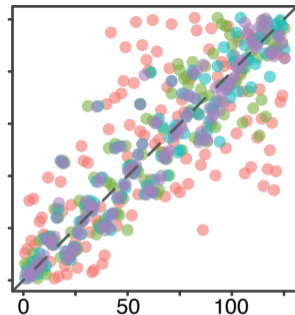

Sampled mutants

● 1  $R^2 = 0.19$  ●  $10^2$   $R^2 = 0.95$   
● 10  $R^2 = 0.88$  ●  $10^3$   $R^2 = 0.97$

Sampled mutants

● 1  $R^2 = 0.34$  ●  $10^2$   $R^2 = 0.90$   
● 10  $R^2 = 0.81$  ●  $10^3$   $R^2 = 0.93$

Sampled mutants

● 1  $R^2 = 0.40$  ●  $10^2$   $R^2 = 0.88$   
● 10  $R^2 = 0.81$  ●  $10^3$   $R^2 = 0.88$
