# Supplementary figures and images for: The population genetics of collateral resistance and sensitivity
Source: eLife journal article supplement (doi:10.7554/elife.73250), 2021-12-10

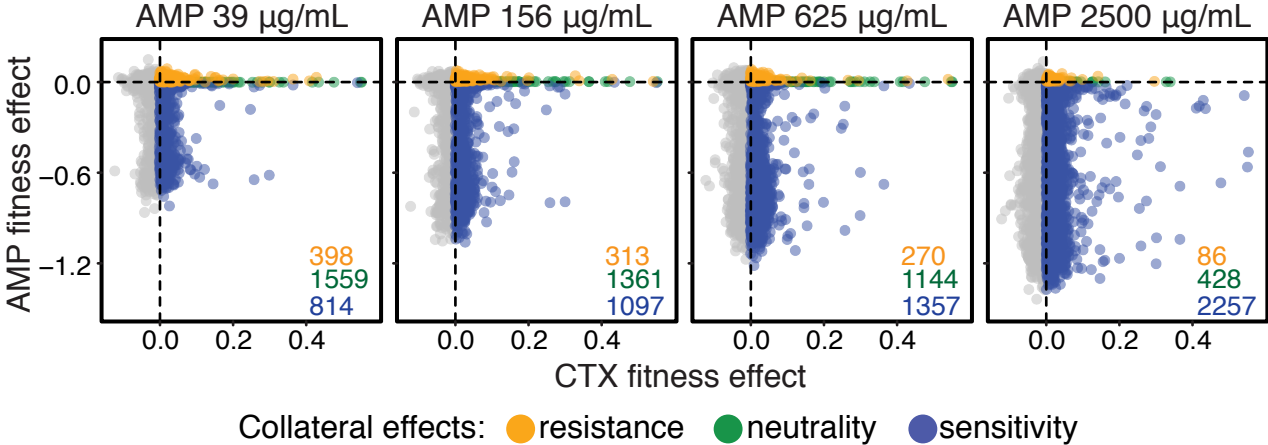

Supplement: supp [file elife-73250-supp-v1.zip › elife_poa_e73250_Figure_1_figure_supplement_1.pdf]

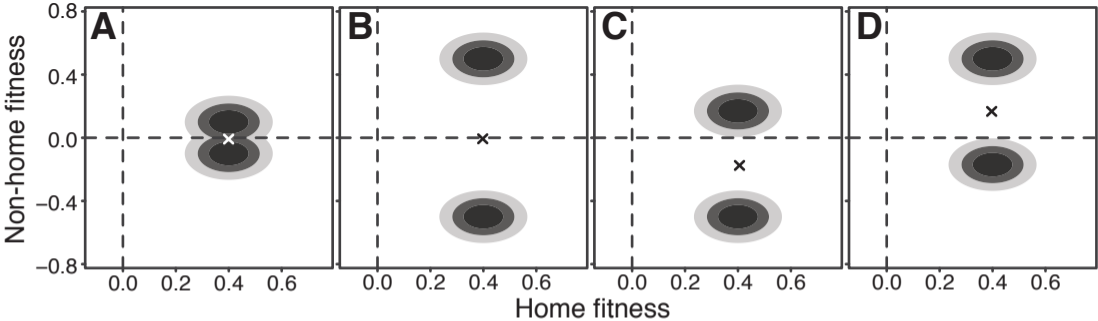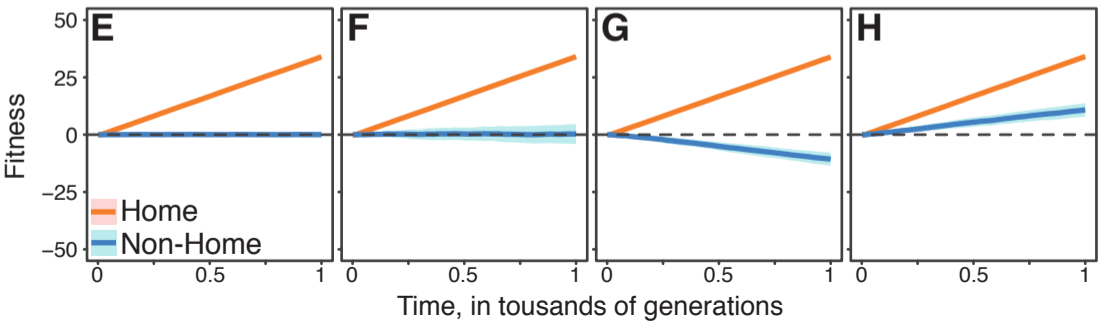

Supplement: supp [file elife-73250-supp-v1.zip › elife_poa_e73250_Figure_2_figure_supplement_1.pdf]

$NU_b = 0.46$ 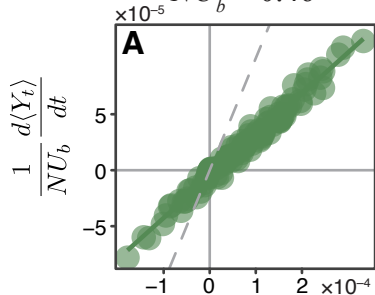 $NU_b = 4.6$ 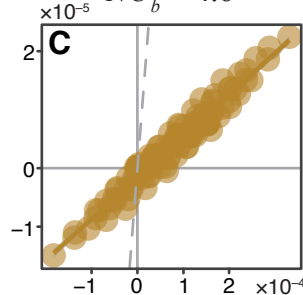 $NU_b = 46$ 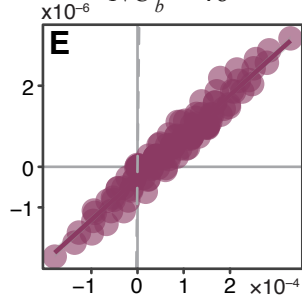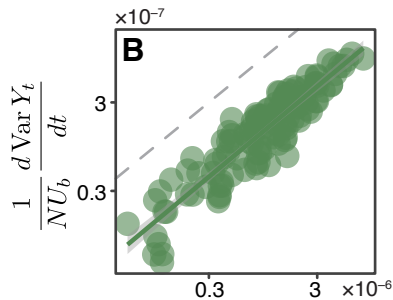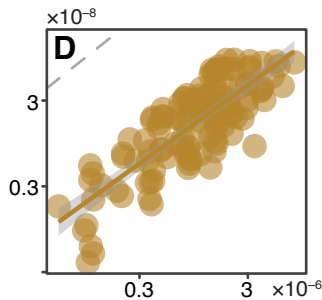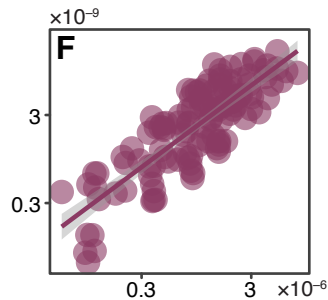

Pleiotropic variance,  $D_{22}$

Supplement: supp [file elife-73250-supp-v1.zip › elife_poa_e73250_Figure_3_figure_supplement_1.pdf]

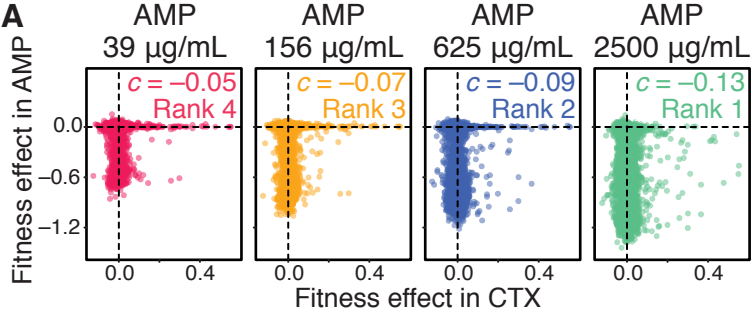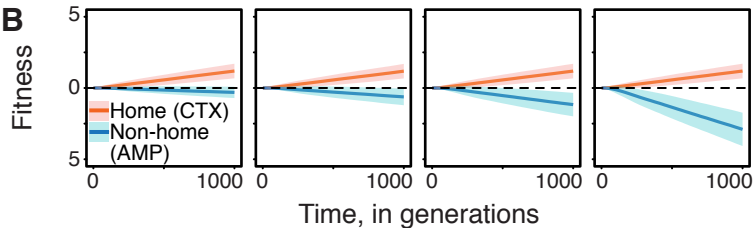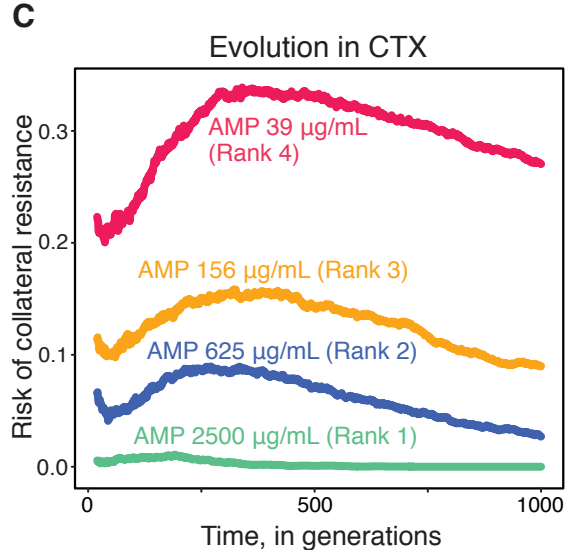

Supplement: supp [file elife-73250-supp-v1.zip › elife_poa_e73250_Figure_4_figure_supplement_1.pdf]
